# Supplementary material for: Drug treatment for panic disorder with or without agoraphobia: systematic review and network meta-analysis of randomised controlled trials
Source: PubMed Central journal article supplement — BMJ. 2022 Jan 19;376:e066084. doi: 10.1136/bmj-2021-066084 (PMC8767458; doi:10.1136/bmj-2021-066084), 2022-01-19
Supplement: chan066084.ww.pdf [file chan066084.ww.pdf]

**eTable 1. Treatment comparisons and data used for pooling disease remission**

| Author                  | Year | Duration of treatment (weeks) | Intervention | Remission | Non- remission |
|-------------------------|------|-------------------------------|--------------|-----------|----------------|
| <b>BZDs vs placebo</b>  |      |                               |              |           |                |
| Ballenger               | 1988 | 8                             | BZD          | 136       | 111            |
|                         |      |                               | Placebo      | 75        | 159            |
| Klosko                  | 1990 | 15                            | BZD          | 8         | 8              |
|                         |      |                               | Placebo      | 4         | 7              |
| Lydiard                 | 1992 | 6                             | BZD          | 14        | 9              |
|                         |      |                               | Placebo      | 5         | 28             |
| Schweizer               | 1993 | 6                             | BZD          | 74        | 13             |
|                         |      |                               | Placebo      | 37        | 24             |
| Pecknold                | 1994 | 6                             | BZD          | 55        | 14             |
|                         |      |                               | Placebo      | 34        | 36             |
| Davidson                | 1994 | 4                             | BZD          | 56        | 42             |
|                         |      |                               | Placebo      | 40        | 61             |
| Carter                  | 1995 | 4                             | BZD          | 109       | 119            |
|                         |      |                               | Placebo      | 36        | 45             |
| Noyes Jr                | 1996 | 8                             | BZD          | 52        | 13             |
|                         |      |                               | Placebo      | 19        | 15             |
| Rosenbaum               | 1997 | 9                             | BZD          | 49        | 18             |
|                         |      |                               | Placebo      | 38        | 31             |
| Moroz                   | 1999 | 6                             | BZD          | 137       | 84             |
|                         |      |                               | Placebo      | 79        | 137            |
| Valenca                 | 2003 | 6                             | BZD          | 14        | 4              |
|                         |      |                               | Placebo      | 1         | 11             |
| <b>TCAs vs placebo</b>  |      |                               |              |           |                |
| Lydiard                 | 1993 | 12                            | TCA          | 22        | 4              |
|                         |      |                               | Placebo      | 13        | 4              |
| Wade                    | 1997 | 8                             | TCA          | 50        | 48             |
|                         |      |                               | Placebo      | 32        | 64             |
| <b>SSRIs vs placebo</b> |      |                               |              |           |                |
| Black                   | 1993 | 8                             | Fluvoxamine  | 18        | 7              |
|                         |      |                               | Placebo      | 6         | 19             |
| Hoehn-Saric             | 1993 | 8                             | Fluvoxamine  | 11        | 7              |
|                         |      |                               | Placebo      | 4         | 14             |
| Sandmann                | 1998 | 6                             | Fluvoxamine  | 8         | 9              |
|                         |      |                               | Placebo      | 6         | 12             |
| Asnis                   | 2001 | 8                             | Fluvoxamine  | 60        | 27             |

| Author                  | Year | Duration of treatment (weeks) | Intervention | Remission | Non- remission |
|-------------------------|------|-------------------------------|--------------|-----------|----------------|
|                         |      |                               | Placebo      | 42        | 50             |
| Londborg                | 1998 | 12                            | Sertraline   | 72        | 55             |
|                         |      |                               | Placebo      | 18        | 26             |
| Pohl                    | 1998 | 10                            | Sertraline   | 49        | 30             |
|                         |      |                               | Placebo      | 40        | 47             |
| Pollack                 | 1998 | 10                            | Sertraline   | 50        | 38             |
|                         |      |                               | Placebo      | 41        | 47             |
| Michelson               | 1998 | 10                            | Fluoxetine   | 18        | 62             |
|                         |      |                               | Placebo      | 11        | 61             |
| Michelson               | 2001 | 12                            | Fluoxetine   | 38        | 52             |
|                         |      |                               | Placebo      | 25        | 65             |
| Oehrberg                | 1995 | 12                            | Paroxetine   | 19        | 41             |
|                         |      |                               | Placebo      | 8         | 52             |
| Sheehan                 | 2005 | 10                            | Paroxetine   | 236       | 141            |
|                         |      |                               | Placebo      | 208       | 187            |
| Bergink                 | 2005 | 9                             | Paroxetine   | 3         | 6              |
|                         |      |                               | Placebo      | 5         | 5              |
| Stahl                   | 2003 | 10                            | Escitalopram | 63        | 62             |
|                         |      |                               | Placebo      | 43        | 71             |
| <b>TCAs vs BZDs</b>     |      |                               |              |           |                |
| Uhlenhuth               | 1989 | 8                             | TCA          | 10        | 10             |
|                         |      |                               | BZD          | 9         | 9              |
|                         |      |                               | Placebo      | 6         | 14             |
| Taylor                  | 1990 | 8                             | TCA          | 15        | 6              |
|                         |      |                               | BZD          | 15        | 9              |
|                         |      |                               | Placebo      | 10        | 10             |
| Andersch                | 1991 | 8                             | TCA          | 15        | 26             |
|                         |      |                               | BZD          | 14        | 27             |
|                         |      |                               | Placebo      | 9         | 32             |
|                         | 1992 | 8                             | TCA          | 274       | 117            |
|                         |      |                               | BZD          | 270       | 116            |
|                         |      |                               | Placebo      | 196       | 195            |
| Schweizer               | 1993 | 8                             | TCA          | 9         | 11             |
|                         |      |                               | BZD          | 19        | 14             |
|                         |      |                               | Placebo      | 4         | 11             |
| Holland (alprazolam)    | 1999 | 12                            | TCA          | 83        | 45             |
|                         |      |                               | BZD          | 80        | 49             |
| <b>SNRIs vs placebo</b> |      |                               |              |           |                |

| Author                              | Year | Duration of treatment (weeks) | Intervention   | Remission | Non- remission |
|-------------------------------------|------|-------------------------------|----------------|-----------|----------------|
| Bradwejn                            | 2005 | 10                            | Venlafaxine    | 88        | 72             |
|                                     |      |                               | Placebo        | 88        | 80             |
| Liebowitz                           | 2009 | 10                            | Venlafaxine    | 80        | 75             |
|                                     |      |                               | Placebo        | 67        | 88             |
| <b>TCAs vs SSRIs</b>                |      |                               |                |           |                |
| Bystritsky                          | 1995 | 10                            | TCA            | 6         | 5              |
|                                     |      |                               | Fluoxetine     | 7         | 3              |
| Amore                               | 1999 | 24                            | TCA            | 13        | 4              |
|                                     |      |                               | Fluoxetine     | 14        | 4              |
| Nair                                | 1996 | 8                             | TCA            | 31        | 17             |
|                                     |      |                               | Fluvoxamine    | 19        | 31             |
|                                     |      |                               | Placebo        | 24        | 26             |
| Bakker                              | 1999 | 12                            | TCA            | 17        | 15             |
|                                     |      |                               | Paroxetine     | 21        | 11             |
|                                     |      |                               | Placebo        | 11        | 21             |
| Lecrubier                           | 1997 | 12                            | TCA            | 40        | 81             |
|                                     |      |                               | Paroxetine     | 56        | 67             |
|                                     |      |                               | Placebo        | 37        | 86             |
| <b>SNRIs vs SSRIs vs placebo</b>    |      |                               |                |           |                |
| Pollack                             | 2007 | 12                            | Venlafaxine    | 86        | 72             |
|                                     |      |                               | Paroxetine     | 98        | 63             |
|                                     |      |                               | Placebo        | 55        | 101            |
| Pollack                             | 2007 | 12                            | Venlafaxine    | 101       | 55             |
|                                     |      |                               | Paroxetine     | 88        | 63             |
|                                     |      |                               | Placebo        | 75        | 82             |
| <b>TCAs vs buspirone vs placebo</b> |      |                               |                |           |                |
| Pohl                                | 1989 | 8                             | TCA            | 1         | 13             |
|                                     |      |                               | Buspirone      | 4         | 12             |
|                                     |      |                               | Placebo        | 2         | 12             |
| Sheehan                             | 1990 | 8                             | TCA            | 10        | 8              |
|                                     |      |                               | Buspirone      | 9         | 9              |
|                                     |      |                               | Placebo        | 7         | 11             |
| <b>Other treatment comparisons</b>  |      |                               |                |           |                |
| Munjack                             | 1989 | 5                             | BZD            | 15        | 5              |
|                                     |      |                               | Beta-blocker   | 7         | 12             |
|                                     |      |                               | Placebo        | 7         | 9              |
| Pollack                             | 2003 | 8                             | Paroxetine+BZD | 4         | 16             |
|                                     |      |                               | Paroxetine     | 4         | 18             |

| <b>Author</b> | <b>Year</b> | <b>Duration of treatment (weeks)</b> | <b>Intervention</b> | <b>Remission</b> | <b>Non- remission</b> |
|---------------|-------------|--------------------------------------|---------------------|------------------|-----------------------|
| Sheehan       | 1993        | 8                                    | BZD                 | 20               | 14                    |
|               |             |                                      | Buspirone           | 8                | 19                    |
|               |             |                                      | Placebo             | 10               | 21                    |
| Tiller        | 1999        | 8                                    | MAOI                | 97               | 85                    |
|               |             |                                      | Fluoxetine          | 104              | 80                    |
| Versiani      | 2002        | 8                                    | NRI                 | 19               | 18                    |
|               |             |                                      | Placebo             | 9                | 29                    |
| Nardi         | 2011        | 8                                    | BZD                 | 49               | 14                    |
|               |             |                                      | Paroxetine          | 39               | 18                    |
| Bertani       | 2004        | 12.8                                 | NRI                 | 9                | 18                    |
|               |             |                                      | Paroxetine          | 17               | 13                    |

BZDs, benzodiazepine; MAOIs, monoamine oxidase inhibitors; NRI, norepinephrine reuptake inhibitors; SSRIs, selective serotonin reuptake inhibitors; SNRIs, serotonin norepinephrine reuptake inhibitors; TCAs, tricyclic antidepressants

**eTable 2. Exploring source of heterogeneity for remission by a meta-regression**

| <b>Paroxetine vs placebo</b>  | <b>N</b> | <b>Tau<sup>2</sup></b> | <b>I<sup>2</sup></b> |
|-------------------------------|----------|------------------------|----------------------|
| None                          | 7        | 0.02568                | 55.77                |
| - Duration of treatment       | 7        | 0.02093                | 38.78                |
| - Percent female              | 7        | 0.02892                | 56.99                |
| - Mean age                    | 6        | 0.02573                | 59.29                |
| - Duration of panic disorder  | 4        | 0.05144                | 70.10                |
| <b>Venlafaxine vs placebo</b> | <b>N</b> | <b>Tau<sup>2</sup></b> | <b>I<sup>2</sup></b> |
| None                          | 4        | 0.01382                | 52.02                |
| - Duration of treatment       | 4        | 5.3e-07                | 0                    |
| - Percent female              | 4        | 8.9e-07                | 0.01                 |
| - Mean age                    | 4        | 0.01145                | 45.21                |
| - Duration of panic disorder  | 4        | 2.2e-07                | 0                    |

**eTable 3. Estimation of the relative treatment effects (95% confidence intervals) from sensitivity analysis of disease remission**

|         |                  |                  |                         |                         |                  |                  |                         |                         |
|---------|------------------|------------------|-------------------------|-------------------------|------------------|------------------|-------------------------|-------------------------|
| Placebo | 1.51 (0.43,5.35) | 1.29 (0.81,2.07) | <b>1.27 (1.12,1.45)</b> | <b>1.38 (1.26,1.51)</b> | 1.10 (0.72,1.68) | 1.30 (0.99,1.71) | <b>1.47 (1.31,1.65)</b> | <b>1.39 (1.24,1.55)</b> |
|         | SSRI+BZD         | 0.85 (0.22,3.27) | 0.84 (0.24,2.99)        | 0.91 (0.26,3.20)        | 0.73 (0.19,2.75) | 0.86 (0.24,3.10) | 0.97 (0.27,3.44)        | 0.92 (0.26,3.25)        |
|         |                  | NRI              | 0.98 (0.61,1.59)        | 1.06 (0.67,1.70)        | 0.85 (0.45,1.60) | 1.00 (0.59,1.71) | 1.14 (0.70,1.83)        | 1.07 (0.66,1.73)        |
|         |                  |                  | SNRI                    | 1.08 (0.94,1.24)        | 0.86 (0.56,1.34) | 1.02 (0.76,1.36) | 1.15 (0.97,1.37)        | 1.09 (0.92,1.29)        |
|         |                  |                  |                         | SSRI                    | 0.80 (0.52,1.23) | 0.94 (0.73,1.22) | 1.07 (0.94,1.22)        | 1.01 (0.88,1.15)        |
|         |                  |                  |                         |                         | Buspirone        | 1.18 (0.72,1.94) | 1.33 (0.87,2.04)        | 1.26 (0.83,1.92)        |
|         |                  |                  |                         |                         |                  | MAOI             | 1.13 (0.85,1.51)        | 1.07 (0.80,1.43)        |
|         |                  |                  |                         |                         |                  |                  | BZD                     | 0.94 (0.84,1.06)        |
|         |                  |                  |                         |                         |                  |                  |                         | TCA                     |

Results are risk ratios (95% confidence intervals) between each pair of treatments from network meta-analysis. Comparisons are read from right to left. For example, the risk ratio for remission with TCA compared to BZD is 0.94 (95% CI: 0.84 to 1.06).

BZD, benzodiazepine; MAOI, monoamine oxidase inhibitors; NRI, norepinephrine reuptake inhibitor; SSRI, selective serotonin reuptake inhibitors; SNRI, serotonin norepinephrine reuptake inhibitors; TCA, tricyclic antidepressants

**eTable 4. Treatment comparisons and data used for pooling dropout rate**

| Author                 | Year | Duration of treatment | Definition of drop out                                                                  | Intervention | Dropout | Non-dropout |
|------------------------|------|-----------------------|-----------------------------------------------------------------------------------------|--------------|---------|-------------|
| <b>BZDs vs placebo</b> |      |                       |                                                                                         |              |         |             |
| Ballenger              | 1988 | 8                     | AE, inefficacy                                                                          | BZD          | 21      | 226         |
|                        |      |                       |                                                                                         | Placebo      | 102     | 132         |
| Klosko                 | 1990 | 15                    | AE, inefficacy, protocol violation                                                      | BZD          | 1       | 16          |
|                        |      |                       |                                                                                         | Placebo      | 7       | 11          |
| Ciraulo                | 1990 | 14                    | AE, inefficacy                                                                          | BZD          | 4       | 21          |
|                        |      |                       |                                                                                         | Placebo      | 5       | 6           |
| Tesar                  | 1991 | 6                     | AE, inefficacy                                                                          | BZD          | 4       | 20          |
|                        |      |                       |                                                                                         | Placebo      | 14      | 8           |
| Lydiard                | 1992 | 6                     | AE, inefficacy, administrative                                                          | BZD          | 7       | 21          |
|                        |      |                       |                                                                                         | Placebo      | 18      | 15          |
| Schweizer              | 1993 | 6                     | AE, intercurrent illness, patient withdraw, lost to F/U                                 | BZD          | 15      | 87          |
|                        |      |                       |                                                                                         | Placebo      | 31      | 61          |
| Beauclair              | 1994 | 4                     | AE, inefficacy                                                                          | BZD          | 1       | 12          |
|                        |      |                       |                                                                                         | Placebo      | 8       | 8           |
| Pecknold               | 1994 | 6                     | AE, inefficacy                                                                          | BZD          | 9       | 60          |
|                        |      |                       |                                                                                         | Placebo      | 20      | 49          |
| Davidson               | 1994 | 4                     | Responded & dropped out, AE, protocol violation, inefficacy, patient withdraw           | BZD          | 12      | 87          |
|                        |      |                       |                                                                                         | Placebo      | 15      | 88          |
| Carter                 | 1995 | 4                     | AE, inefficacy, intercurrent illness, protocol violation, loss to F/U, patient withdraw | BZD          | 29      | 203         |
|                        |      |                       |                                                                                         | Placebo      | 10      | 73          |
| Noyes Jr               | 1996 | 8                     | AE, inefficacy                                                                          | BZD          | 13      | 65          |
|                        |      |                       |                                                                                         | Placebo      | 34      | 45          |
| Rosenbaum              | 1997 | 9                     | AE, inefficacy                                                                          | BZD          | 30      | 37          |
|                        |      |                       |                                                                                         | Placebo      | 18      | 51          |
| Moroz                  | 1999 | 6                     | AE, inefficacy, loss to F/U, patient withdraw                                           | BZD          | 41      | 181         |
|                        |      |                       |                                                                                         | Placebo      | 55      | 161         |
| Valenca                | 2003 | 6                     | Inefficacy                                                                              | BZD          | 1       | 13          |
|                        |      |                       |                                                                                         | Placebo      | 0       | 9           |
| Savoldi                | 1995 | 4                     | AE, inefficacy                                                                          | BZD          | 1       | 14          |

| Author                         | Year | Duration of treatment | Definition of drop out                                                                   | Intervention | Dropout | Non-dropout |
|--------------------------------|------|-----------------------|------------------------------------------------------------------------------------------|--------------|---------|-------------|
|                                |      |                       |                                                                                          | Placebo      | 6       | 9           |
| <b>TCAs vs placebo</b>         |      |                       |                                                                                          |              |         |             |
| Lydiard                        | 1993 | 12                    | Not reported                                                                             | TCA          | 2       | 26          |
|                                |      |                       |                                                                                          | Placebo      | 11      | 17          |
| Mavissakalian                  | 1995 | 8                     | Inefficacy, protocol violation, medication/pharmacy error                                | TCA          | 3       | 17          |
|                                |      |                       |                                                                                          | Placebo      | 2       | 15          |
| Caillard                       | 1999 | 8                     | Inefficacy/worsening of symptoms, AE                                                     | TCA          | 15      | 46          |
|                                |      |                       |                                                                                          | Placebo      | 25      | 32          |
| Barlow                         | 2000 | 12                    | Inefficacy, perceived improvement, lost to F/U, noncompliant, AE, unrelated to treatment | TCA          | 32      | 51          |
|                                |      |                       |                                                                                          | Placebo      | 10      | 14          |
| Broocks                        | 1998 | 10                    | Not reported                                                                             | TCA          | 0       | 15          |
|                                |      |                       |                                                                                          | Placebo      | 4       | 11          |
| <b>TCAs vs BZDs vs placebo</b> |      |                       |                                                                                          |              |         |             |
| Uhlenhuth                      | 1989 | 8                     | Not reported                                                                             | TCA          | 10      | 10          |
|                                |      |                       |                                                                                          | BZD          | 7       | 13          |
|                                |      |                       |                                                                                          | Placebo      | 12      | 8           |
| Taylor                         | 1990 | 8                     | Not reported                                                                             | TCA          | 5       | 22          |
|                                |      |                       |                                                                                          | BZD          | 2       | 24          |
|                                |      |                       |                                                                                          | Placebo      | 6       | 20          |
| Andersch                       | 1991 | 8                     | AE, inefficacy, refused treatment                                                        | TCA          | 11      | 30          |
|                                |      |                       |                                                                                          | BZD          | 2       | 39          |
|                                |      |                       |                                                                                          | Placebo      | 22      | 19          |
|                                | 1992 | 8                     | AE, inefficacy, refused treatment                                                        | TCA          | 118     | 273         |
|                                |      |                       |                                                                                          | BZD          | 67      | 319         |
|                                |      |                       |                                                                                          | Placebo      | 171     | 220         |
| Keller                         | 1993 | 16                    | NR                                                                                       | TCA          | 10      | 36          |
|                                |      |                       |                                                                                          | BZD          | 8       | 35          |
|                                |      |                       |                                                                                          | Placebo      | 13      | 24          |
| Schweizer                      | 1993 | 8                     | AE, inefficacy, unknown reasons                                                          | TCA          | 14      | 20          |
|                                |      |                       |                                                                                          | BZD          | 4       | 33          |
|                                |      |                       |                                                                                          | Placebo      | 20      | 15          |
| Sheikh                         | 1999 | 8                     | NR                                                                                       | TCA          | 1       | 9           |
|                                |      |                       |                                                                                          | BZD          | 0       | 8           |
|                                |      |                       |                                                                                          | Placebo      | 6       | 1           |



| Author                  | Year | Duration of treatment | Definition of drop out                                                                                             | Intervention | Dropout | Non-dropout |
|-------------------------|------|-----------------------|--------------------------------------------------------------------------------------------------------------------|--------------|---------|-------------|
| Holland (adinazolam)    | 1999 | 24                    | Patient withdraw (most common reason)                                                                              | TCA          | 42      | 86          |
|                         |      |                       |                                                                                                                    | BZD          | 17      | 112         |
| Holland (alprazolam)    | 1999 | 12                    | AE, inefficacy, others                                                                                             | TCA          | 22      | 144         |
|                         |      |                       |                                                                                                                    | BZD          | 42      | 107         |
| <b>SSRIs vs Placebo</b> |      |                       |                                                                                                                    |              |         |             |
| Black                   | 1993 | 8                     | AE, inefficacy, protocol violation, attempt suicide, intercurrent illness, loss to F/U                             | Fluvoxamine  | 21      | 4           |
|                         |      |                       |                                                                                                                    | Placebo      | 18      | 7           |
| Hoehn-Saric             | 1993 | 8                     | AE, inefficacy, loss F/U                                                                                           | Fluvoxamine  | 6       | 19          |
|                         |      |                       |                                                                                                                    | Placebo      | 7       | 18          |
| Sharp                   | 1996 | 12                    | Not reported                                                                                                       | Fluvoxamine  | 77      | 29          |
|                         |      |                       |                                                                                                                    | Placebo      | 99      | 28          |
| Sandmann                | 1998 | 6                     | AE, noncompliance, protocol violation, inefficacy                                                                  | Fluvoxamine  | 6       | 17          |
|                         |      |                       |                                                                                                                    | Placebo      | 5       | 18          |
| Asnis                   | 2001 | 8                     | AE, inefficacy, intercurrent illness, loss to F/U, protocol violation, attempt suicide, non-drug associated events | Fluvoxamine  | 29      | 58          |
|                         |      |                       |                                                                                                                    | Placebo      | 29      | 63          |
| Oehrberg                | 1995 | 12                    | AE, inefficacy, noncompliance, uncertain diagnosis                                                                 | Paroxetine   | 5       | 55          |
|                         |      |                       |                                                                                                                    | Placebo      | 8       | 52          |
| Ballenger               | 1998 | 10                    | AE, inefficacy, anxiety-like symptom, non-compliance                                                               | Paroxetine   | 22      | 45          |
|                         |      |                       |                                                                                                                    | Placebo      | 23      | 46          |
| Sheehan                 | 2005 | 10                    | AE, inefficacy, protocol violation, loss to F?U, other                                                             | Paroxetine   | 133     | 311         |
|                         |      |                       |                                                                                                                    | Placebo      | 117     | 328         |
| Hendriks                | 2010 | 14                    | NR                                                                                                                 | Paroxetine   | 3       | 14          |
|                         |      |                       |                                                                                                                    | Placebo      | 1       | 11          |
| Londborg                | 1998 | 12                    | AE, inefficacy, lost of F/U, noncompliance, protocol violation,                                                    | Sertraline   | 49      | 83          |
|                         |      |                       |                                                                                                                    | Placebo      | 14      | 31          |

| Author                          | Year | Duration of treatment | Definition of drop out                                                                   | Intervention | Dropout | Non-dropout |
|---------------------------------|------|-----------------------|------------------------------------------------------------------------------------------|--------------|---------|-------------|
|                                 |      |                       | intercurrent illness, lab abnormality, other                                             |              |         |             |
| Pohl                            | 1998 | 10                    | AE, inefficacy                                                                           | Sertraline   | 21      | 59          |
|                                 |      |                       |                                                                                          | Placebo      | 15      | 73          |
| Pollack                         | 1998 | 10                    | AE, inefficacy, protocol violation, loss to F/U, patient withdraw, other                 | Sertraline   | 17      | 71          |
|                                 |      |                       |                                                                                          | Placebo      | 15      | 73          |
| Michelson                       | 1998 | 10                    | AE, inefficacy, lost to F/U, patient withdraw, protocol violation, satisfactory response | Fluoxetine   | 35      | 49          |
|                                 |      |                       |                                                                                          | Placebo      | 46      | 32          |
| Stahl                           | 2003 | 10                    | Lost to F/U, AE, patient withdraw, protocol violation, other                             | Escitalopram | 331     | 97          |
|                                 |      |                       |                                                                                          | Placebo      | 547     | 72          |
| <b>SNRIs vs placebo</b>         |      |                       |                                                                                          |              |         |             |
| Pollack                         | 1996 | 8                     | Patient withdrawal, inefficacy, loss to F/U, AE                                          | Venlafaxine  | 2       | 11          |
|                                 |      |                       |                                                                                          | Placebo      | 8       | 4           |
| Liebowitz                       | 2009 | 10                    | AE, loss to F/U, inefficacy, protocol violation, other, patient withdraw                 | Venlafaxine  | 65      | 110         |
|                                 |      |                       |                                                                                          | Placebo      | 53      | 115         |
| Bradwejn                        | 2005 | 10                    | AE, inefficacy                                                                           | Venlafaxine  | 30      | 130         |
|                                 |      |                       |                                                                                          | Placebo      | 33      | 135         |
| <b>MAOIs vs placebo</b>         |      |                       |                                                                                          |              |         |             |
| Van Vliet                       | 1993 | 12                    | Inefficacy                                                                               | MAOI         | 0       | 15          |
|                                 |      |                       |                                                                                          | Placebo      | 1       | 14          |
| Loerch                          | 1999 | 8                     | Inefficacy, protocol violation, AE                                                       | MOAI         | 7       | 9           |
|                                 |      |                       |                                                                                          | Placebo      | 2       | 9           |
| <b>TCAs vs SSRIs vs placebo</b> |      |                       |                                                                                          |              |         |             |
| Bakish                          | 1996 | 8                     | AE, inefficacy                                                                           | TCA          | 5       | 13          |
|                                 |      |                       |                                                                                          | Fluvoxamine  | 11      | 7           |
|                                 |      |                       |                                                                                          | Placebo      | 10      | 8           |
| Nair                            | 1996 | 8                     | AE, inefficacy                                                                           | TCA          | 16      | 32          |
|                                 |      |                       |                                                                                          | Fluvoxamine  | 31      | 19          |
|                                 |      |                       |                                                                                          | Placebo      | 29      | 21          |

| Author                              | Year | Duration of treatment | Definition of drop out                                                                                          | Intervention     | Dropout | Non-dropout |
|-------------------------------------|------|-----------------------|-----------------------------------------------------------------------------------------------------------------|------------------|---------|-------------|
| Lecrubier                           | 1997 | 12                    | Inefficacy, AE, noncompliance, loss to F/U, patient improvement, others                                         | TCA              | 33      | 88          |
|                                     |      |                       |                                                                                                                 | Paroxetine       | 36      | 87          |
|                                     |      |                       |                                                                                                                 | Placebo          | 44      | 79          |
| Bakker                              | 1999 | 12                    | AE, inefficacy, non-compliance, patient improvement                                                             | TCA              | 3       | 29          |
|                                     |      |                       |                                                                                                                 | Paroxetine       | 4       | 28          |
|                                     |      |                       |                                                                                                                 | Placebo          | 2       | 30          |
| Amore                               | 1999 | 24                    | AE                                                                                                              | TCA              | 1       | 18          |
|                                     |      |                       |                                                                                                                 | Fluoxetine       | 2       | 17          |
| Lepola                              | 2003 | 26                    | AE, inefficacy, patient withdraw, lost to F/U, others                                                           | TCA              | 37      | 32          |
|                                     |      |                       |                                                                                                                 | Sertraline       | 57      | 81          |
| Wade                                | 1997 | 8                     | AE, inefficacy, patient withdraw, lost to F/U, non-compliance, concurrent illness, no longer met study criteria | TCA              | 25      | 73          |
|                                     |      |                       |                                                                                                                 | Citalopram       | 26      | 71          |
|                                     |      |                       |                                                                                                                 | Placebo          | 25      | 71          |
| <b>SNRIs vs SSRIs vs placebo</b>    |      |                       |                                                                                                                 |                  |         |             |
| Pollack                             | 2007 | 12                    | AE, inefficacy, patient withdrawal, loss to F/U, protocol violation, other, patient request                     | Venlafaxine      | 25      | 135         |
|                                     |      |                       |                                                                                                                 | Paroxetine       | 27      | 124         |
|                                     |      |                       |                                                                                                                 | Placebo          | 38      | 119         |
| Pollack                             | 2007 | 12                    | AE, loss to F/U, inefficacy, protocol violation, other, patient request                                         | Venlafaxine      | 24      | 134         |
|                                     |      |                       |                                                                                                                 | Paroxetine       | 25      | 136         |
|                                     |      |                       |                                                                                                                 | Placebo          | 35      | 121         |
| <b>SSRIs+BZDs vs SSRIs</b>          |      |                       |                                                                                                                 |                  |         |             |
| Goddard                             | 2001 | 12                    | AE, non-compliance, protocol violation, loss to F/U, clinical worsening                                         | Sertraline + BZD | 6       | 18          |
|                                     |      |                       |                                                                                                                 | Sertraline       | 10      | 16          |
| Pollack                             | 2003 | 8                     | Not reported                                                                                                    | Paroxetine + BZD | 11      | 9           |
|                                     |      |                       |                                                                                                                 | Paroxetine       | 11      | 11          |
| <b>TCAs vs buspirone vs placebo</b> |      |                       |                                                                                                                 |                  |         |             |
| Pohl                                | 1989 | 8                     | Loss to F/U, inefficacy, AE, administrative                                                                     | TCA              | 4       | 10          |
|                                     |      |                       |                                                                                                                 | Buspirone        | 5       | 13          |
|                                     |      |                       |                                                                                                                 | Placebo          | 3       | 11          |

| Author                              | Year | Duration of treatment | Definition of drop out                                                                                                       | Intervention | Dropout | Non-dropout |
|-------------------------------------|------|-----------------------|------------------------------------------------------------------------------------------------------------------------------|--------------|---------|-------------|
| Robinson                            | 1989 | 8                     | Not reported                                                                                                                 | TCA          | 4       | 24          |
|                                     |      |                       |                                                                                                                              | Buspirone    | 8       | 26          |
|                                     |      |                       |                                                                                                                              | Placebo      | 4       | 25          |
| Sheehan                             | 1990 | 8                     | Not reported                                                                                                                 | TCA          | 0       | 18          |
|                                     |      |                       |                                                                                                                              | Buspirone    | 2       | 16          |
|                                     |      |                       |                                                                                                                              | Placebo      | 0       | 18          |
| <b>BZDs vs buspirone vs placebo</b> |      |                       |                                                                                                                              |              |         |             |
| Schweizer                           | 1988 | 4                     | Not reported                                                                                                                 | BZD          | 0       | 9           |
|                                     |      |                       |                                                                                                                              | Buspirone    | 5       | 2           |
| Sheehan                             | 1993 | 8                     | AE                                                                                                                           | BZD          | 1       | 33          |
|                                     |      |                       |                                                                                                                              | Buspirone    | 11      | 23          |
|                                     |      |                       |                                                                                                                              | Placebo      | 4       | 29          |
| <b>Other treatment comparisons</b>  |      |                       |                                                                                                                              |              |         |             |
| Munjack                             | 1989 | 5                     | Patient withdraw, inefficacy, AE                                                                                             | BZD          | 0       | 20          |
|                                     |      |                       |                                                                                                                              | Beta-blocker | 4       | 15          |
|                                     |      |                       |                                                                                                                              | Placebo      | 5       | 11          |
| Versiani                            | 2002 | 8                     | AE, loss to F/U, protocol violation, patient withdraw, medical illness                                                       | NRI          | 11      | 31          |
|                                     |      |                       |                                                                                                                              | Placebo      | 21      | 17          |
| Woods                               | 1992 | 4                     | AE, inefficacy                                                                                                               | TCA          | 9       | 16          |
|                                     |      |                       |                                                                                                                              | TCA + BZD    | 6       | 17          |
| Nardi                               | 2011 | 8                     | Inefficacy                                                                                                                   | BZD          | 1       | 62          |
|                                     |      |                       |                                                                                                                              | Paroxetine   | 2       | 55          |
| Pini                                | 2003 | 16                    | AE, inefficacy, early improvement, patient withdraw, loss to F/U, noncompliance, protocol violation, medical illness, others | MAOI         | 4       | 14          |
|                                     |      |                       |                                                                                                                              | Paroxetine   | 2       | 12          |
| Ribeiro                             | 2001 | 8                     | AE                                                                                                                           | NaSSA        | 2       | 12          |
|                                     |      |                       |                                                                                                                              | Fluoxetine   | 3       | 10          |
| Kruger                              | 1999 | 8                     | Inefficacy, AE, protocol violation, others                                                                                   | MAOI         | 15      | 38          |
|                                     |      |                       |                                                                                                                              | TCA          | 15      | 38          |
| Bertani                             | 2004 | 12.8                  | AE, protocol violation                                                                                                       | NRI          | 7       | 27          |
|                                     |      |                       |                                                                                                                              | Paroxetine   | 4       | 30          |

AE, adverse event; BZD, benzodiazepine; F/U, follow-up; MAOIs, monoamine oxidase inhibitors; NRI, norepinephrine reuptake inhibitor; SSRI, selective serotonin reuptake inhibitors; SNRIs, serotonin norepinephrine reuptake inhibitors; TCAs, tricyclic antidepressants

**eTable 5. Exploring sources of heterogeneity for dropout rate by a meta-regression**

| <b>BZDs vs placebo</b>       | <b>N</b> | <b>Tau<sup>2</sup></b> | <b>I<sup>2</sup></b> |
|------------------------------|----------|------------------------|----------------------|
| Including co-variable        |          |                        |                      |
| None                         | 24       | 0.2995                 | 71.69                |
| - Duration of treatment      | 24       | 0.3137                 | 72.58                |
| - Percent female             | 21       | 0.3268                 | 74.42                |
| - Mean age                   | 20       | 0.1436                 | 53.19                |
| - Duration of panic disorder | 10       | 0.7212                 | 79.83                |
| - Percent agoraphobia        | 16       | 0.3815                 | 75.75                |
| <b>TCAs vs BZDs</b>          | <b>N</b> | <b>Tau<sup>2</sup></b> | <b>I<sup>2</sup></b> |
| None                         | 9        | 0.3971                 | 78.55                |
| - Percent female             | 8        | 0.02192                | 15.23                |
| - Duration of treatment      | 8        | 0.0                    | 0                    |
| - Mean age                   | 7        | 0.01889                | 12.87                |
| - Percent agoraphobia        | 5        | 0.1316                 | 36.25                |

BZD, benzodiazepine; TCA, tricyclic antidepressants

**eTable 6. Estimation of the relative treatment effects (95% confidence intervals) of sensitivity analysis of dropout**

|                |                         |                     |                     |                     |                     |                                   |                      |                                   |                                   |
|----------------|-------------------------|---------------------|---------------------|---------------------|---------------------|-----------------------------------|----------------------|-----------------------------------|-----------------------------------|
| <b>Placebo</b> | 0.84<br>(0.43,1.64)     | 0.58<br>(0.10,3.29) | 0.69<br>(0.34,1.38) | 0.83<br>(0.59,1.16) | 0.94<br>(0.79,1.11) | 1.65<br>(0.90,3.02)               | 1.68<br>(0.44,6.51)  | <b>0.39</b><br><b>(0.29,0.53)</b> | <b>0.70</b><br><b>(0.57,0.87)</b> |
|                | <b>TCA plus<br/>BZD</b> | 0.69<br>(0.11,4.36) | 0.82<br>(0.31,2.13) | 0.99<br>(0.47,2.06) | 1.12<br>(0.59,2.13) | 1.96<br>(0.80,4.82)               | 2.00<br>(0.44,9.05)  | <b>0.47</b><br><b>(0.23,0.97)</b> | 0.84<br>(0.42,1.67)               |
|                |                         | <b>NaSSA</b>        | 1.18<br>(0.18,7.63) | 1.43<br>(0.25,8.33) | 1.62<br>(0.29,9.08) | 2.84<br>(0.45,17.83)              | 2.90<br>(0.32,26.16) | 0.68<br>(0.12,3.93)               | 1.21<br>(0.21,6.93)               |
|                |                         |                     | <b>NRI</b>          | 1.21<br>(0.56,2.63) | 1.37<br>(0.67,2.78) | 2.41<br>(0.95,6.07)               | 2.46<br>(0.54,11.28) | 0.57<br>(0.27,1.23)               | 1.03<br>(0.49,2.13)               |
|                |                         |                     |                     | <b>SNRI</b>         | 1.13<br>(0.79,1.62) | <b>1.99</b><br><b>(1.00,3.97)</b> | 2.03<br>(0.50,8.17)  | <b>0.47</b><br><b>(0.30,0.74)</b> | 0.85<br>(0.57,1.26)               |
|                |                         |                     |                     |                     | <b>SSRI</b>         | 1.76<br>(0.94,3.29)               | 1.80<br>(0.46,7.01)  | <b>0.42</b><br><b>(0.30,0.59)</b> | <b>0.75</b><br><b>(0.58,0.96)</b> |
|                |                         |                     |                     |                     |                     | <b>Buspirone</b>                  | 1.02<br>(0.23,4.49)  | <b>0.24</b><br><b>(0.12,0.46)</b> | <b>0.43</b><br><b>(0.23,0.79)</b> |
|                |                         |                     |                     |                     |                     |                                   | <b>MAOI</b>          | <b>0.23</b><br><b>(0.06,0.93)</b> | 0.42<br>(0.11,1.64)               |
|                |                         |                     |                     |                     |                     |                                   |                      | <b>BZD</b>                        | 1.79<br>(1.28,2.49)               |
|                |                         |                     |                     |                     |                     |                                   |                      |                                   | <b>TCA</b>                        |

Results are risk ratios (95% confidence intervals) between each pair of treatments from network meta-analysis. Comparisons are read from right to left. For example, the risk ratio for dropout with TCA compared to BZD is 1.79 (95% CI: 1.28 to 2.49).

BZDs, benzodiazepines; MAOIs, monoamine oxidase inhibitors; NaSSA, noradrenergic and specific serotonergic antidepressants; NRI, norepinephrine reuptake inhibitor; SSRI, selective serotonin reuptake inhibitor; SNRI, serotonin norepinephrine reuptake inhibitor; TCAs, tricyclic antidepressants

**eTable 7. Treatment comparisons and data used for pooling treatment effects on anxiety score**

| Author                  | Year | Measurement    | Intervention | N         | Mean         | SD         |
|-------------------------|------|----------------|--------------|-----------|--------------|------------|
| <b>TCAs vs placebo</b>  |      |                |              |           |              |            |
| Lydiard                 | 1993 | HAM-A          | TCA          | 28        | 9.3          | 7.7        |
|                         |      |                | Placebo      | 28        | 11.8         | 8          |
| Broocks                 | 1998 | HAM-A          | TCA          | 15        | <b>8.5</b>   | <b>3.7</b> |
|                         |      |                | Placebo      | 15        | 22.9         | <b>9.8</b> |
| Caillard                | 1999 | HAM-A          | TCA          | <b>51</b> | 10.2         | <b>8.6</b> |
|                         |      |                | Placebo      | 51        | <b>15.9</b>  | <b>9.8</b> |
| <b>BZDs vs placebo</b>  |      |                |              |           |              |            |
| Klosko                  | 1990 | HAM-A          | BZD          | 16        | 13.68        | 7.02       |
|                         |      |                | Placebo      | 11        | 13.36        | 5.63       |
| Schweizer               | 1993 | HAM-A          | BZD          | 102       | -11.6        | 7.9        |
|                         |      |                | Placebo      | 92        | -6.1         | 8.5        |
| Pecknold                | 1994 | HAM-A          | BZD          | 69        | -10.4        | 9.14       |
|                         |      |                | Placebo      | 70        | -6.7         | 8.2        |
| Beauchair               | 1994 | Modified HAM-A | BZD          | 13        | 22.2         | 11.8       |
|                         |      |                | Placebo      | 16        | 45.1         | <b>9.6</b> |
| Davidson                | 1994 | HAM-A          | BZD          | 99        | 10.9         | 5.97       |
|                         |      |                | Placebo      | 103       | 13.3         | 6.09       |
| Savoldi                 | 1995 | HAM-A          | BZD          | 14        | <b>9.79</b>  | 5.19       |
|                         |      |                | Placebo      | 9         | 18.56        | 4.25       |
| Noyes Jr                | 1996 | HAM-A          | BZD          | <b>78</b> | <b>9.9</b>   | 8.4        |
|                         |      |                | Placebo      | 79        | 15.4         | 10         |
| <b>SSRIs vs placebo</b> |      |                |              |           |              |            |
| Westernberg             | 1989 | HAM-A          | Fluvoxamine  | 20        | 9.8          | 2.83       |
|                         |      |                | Placebo      | 20        | 20.63        | 2.37       |
| Asnis                   | 2001 | CAS            | Fluvoxamine  | 87        | 6.7          | 6.1        |
|                         |      |                | Placebo      | 92        | 9.1          | 6.1        |
| Hoehn-Saric             | 1993 | CAS            | Fluvoxamine  | 18        | 3.71         | 1.71       |
|                         |      |                | Placebo      | 18        | 7.93         | 2.79       |
| Ballenger               | 1998 | HAM-A          | Paroxetine   | <b>67</b> | 11.3         | 8.3        |
|                         |      |                | Placebo      | 69        | 13.1         | 8.3        |
| Sheehan                 | 2005 | HAM-A          | Paroxetine   | 361       | 11.49        | 7.41       |
|                         |      |                | Placebo      | 384       | 13.72        | 7.45       |
| Michelson               | 1998 | HAM-A          | Fluoxetine   | <b>79</b> | -7.3         | <b>7.6</b> |
|                         |      |                | Placebo      | 74        | -5.3         | <b>7.8</b> |
| Michelson               | 2001 | HAM-A          | Fluoxetine   | 90        | <b>-14.9</b> | 9.1        |
|                         |      |                | Placebo      | 90        | -10          | 9.9        |
| Pollack                 | 1998 | HAM-A          | Sertraline   | 88        | -9.5         | 8.21       |



|                                |      |       |                           |     |       |       |
|--------------------------------|------|-------|---------------------------|-----|-------|-------|
|                                |      |       | Placebo                   | 88  | -8.32 | 8.53  |
| Stahl                          | 2003 | HAM-A | Escitalopram              | 125 | -6.1  | 7.83  |
|                                |      |       | Placebo                   | 114 | -4.6  | 8.54  |
| <b>SNRI vs placebo</b>         |      |       |                           |     |       |       |
| Pollack                        | 1996 | HAM-A | Venlafaxine               | 13  | 12.33 | 8.6   |
|                                |      |       | Placebo                   | 12  | 15.55 | 8.02  |
| Liebowitz                      | 2009 | HAM-A | Venlafaxine               | 104 | -9.51 | 6.93  |
|                                |      |       | Placebo                   | 105 | -7.65 | 6.97  |
| <b>MAOIs vs placebo</b>        |      |       |                           |     |       |       |
| Van Vilet                      | 1993 | HAM-A | MAOI                      | 15  | 15.05 | 3.06  |
|                                |      |       | Placebo                   | 14  | 23.29 | 2.02  |
| Loerch                         | 1999 | HAM-A | MAOI                      | 16  | 19.88 | 9.75  |
|                                |      |       | Placebo                   | 11  | 20.82 | 12.56 |
| <b>TCAs vs SSRIs</b>           |      |       |                           |     |       |       |
| Bystritsky                     | 1995 | HAM-A | TCA                       | 11  | 15    | 11    |
|                                |      |       | Fluoxetine                | 10  | 8     | 6     |
| Lepola                         | 2003 | CAS   | TCA                       | 69  | 7.1   | 6     |
|                                |      |       | Sertraline                | 138 | 7.1   | 5.2   |
| <b>MAOIs vs SSRIs</b>          |      |       |                           |     |       |       |
| Van Vilet                      | 1996 | HAM-A | MAOI                      | 15  | 6.1   | 2.71  |
|                                |      |       | Fluvoxamine               | 15  | 5.5   | 2.71  |
| Pini                           | 2003 | HAM-A | MAOI                      | 18  | 11.56 | 1.84  |
|                                |      |       | Paroxetine                | 14  | 5.86  | 1.96  |
| <b>TCAs vs BZDs vs placebo</b> |      |       |                           |     |       |       |
| Schweizer                      | 1993 | HAM-A | TCA                       | 30  | 9.4   | 8.8   |
|                                |      |       | BZD                       | 37  | 6.3   | 6.7   |
|                                |      |       | Placebo                   | 32  | 9.9   | 8.4   |
| Sheikh                         | 1999 | HAM-A | TCA                       | 9   | 5.3   | 3.65  |
|                                |      |       | BZD                       | 8   | 3.87  | 5.62  |
|                                |      |       | Placebo                   | 4   | 15    | 10.55 |
| <b>Other comparisons</b>       |      |       |                           |     |       |       |
| Woods                          | 1992 | HAM-A | TCA                       | 25  | 15.59 | 4.01  |
|                                |      |       | TCA + BZD                 | 23  | 13.11 | 3.6   |
| Pollack                        | 2003 | HAM-A | Paroxetine                | 22  | 16    | 7.2   |
|                                |      |       | Paroxetine + BZD          | 20  | 16.8  | 6.8   |
| Nardi                          | 2011 | HAM-A | BZD                       | 63  | 10.5  | 3.9   |
|                                |      |       | Paroxetine                | 57  | 10.4  | 3.7   |
| Ravaris                        | 1991 | HAM-A | BZD                       | 14  | 9.89  | 3.93  |
|                                |      |       | Beta-blocker              | 15  | 7.64  | 4.82  |
| Hirschmann                     | 2000 | HAM-A | Fluoxetine + beta-blocker | 13  | 3.4   | 2.5   |

|         |      |       |              |    |       |       |
|---------|------|-------|--------------|----|-------|-------|
|         |      |       | Fluoxetine   | 12 | 9.9   | 3.4   |
| Seedat  | 2003 | HAM-A | NRI          | 8  | 15.3  | 8.8   |
|         |      |       | Citalopram   | 9  | 13.3  | 14.9  |
| Bakker  | 1999 | HAM-A | Paroxetine   | 32 | 12.4  | 7.5   |
|         |      |       | TCA          | 32 | 12.9  | 6     |
|         |      |       | Placebo      | 32 | 16.9  | 8.2   |
| Munjack | 1989 | HAM-A | BZD          | 20 | 12.7  | 7.79  |
|         |      |       | Beta-blocker | 19 | 14.68 | 6.22  |
|         |      |       | Placebo      | 16 | 19.56 | 11.92 |
| Sheehan | 1993 | HAM-A | BZD          | 33 | 12.5  | 8.1   |
|         |      |       | Buspirone    | 23 | 16.1  | 8.1   |
|         |      |       | Placebo      | 29 | 17.9  | 7.1   |
| Sheehan | 1990 | HAM-A | TCA          | 18 | 15.3  | 9.1   |
|         |      |       | Buspirone    | 16 | 15.9  | 8.3   |
|         |      |       | Placebo      | 18 | 18.7  | 7.7   |

BZDs, benzodiazepine; MAOIs, monoamine oxidase inhibitors; NRI, norepinephrine reuptake inhibitor; SSRIs, selective serotonin reuptake inhibitors; SNRIs, serotonin norepinephrine reuptake inhibitors; TCAs; tricyclic antidepressants; BB, beta-blockers; HAM-A, Hamilton Scale for Anxiety; CAS, Clinical Anxiety Scale

**eTable 8. Exploring sources of heterogeneity for anxiety score by a meta-regression**

| <b>TCA vs placebo</b>        | <b>N</b> | <b>Tau2</b> | <b>I2</b> |
|------------------------------|----------|-------------|-----------|
| Including co-variable        |          |             |           |
| None                         | 7        | 14.71       | 73.75     |
| - Mean age                   | 5        | 27.89       | 83.68     |
| - Duration of treatment      | 7        | 19.54       | 77.79     |
| - Percent of female          | 6        | 14.08       | 73.38     |
| - Duration of panic disorder | 3        | 27.87       | 85.39     |
| - Percent of agoraphobia     | 3        | 60.62       | 91.63     |
| <b>BZDs vs placebo</b>       |          | <b>Tau2</b> | <b>I2</b> |
| None                         | 10       | 2.241       | 45.6      |
| - Duration of treatment      | 10       | 3.109       | 52.70     |
| - Percent of female          | 9        | 2.493       | 50.42     |
| - Mean age                   | 9        | 1.641       | 42.11     |
| - Duration of panic disorder | 3        | 0           | 0         |
| - Percent of agoraphobia     | 5        | 0           | 0         |

BZD, benzodiazepine; TCA, tricyclic antidepressants

**eTable 9. Treatment comparisons and data used for pooling of depression score**

| Author                   | Year | Measurement | Intervention              | N   | mean  | SD   |
|--------------------------|------|-------------|---------------------------|-----|-------|------|
| <b>BZDs vs placebo</b>   |      |             |                           |     |       |      |
| Schweizer                | 1993 | HAM-D       | BZD                       | 102 | -5.5  | 6.3  |
|                          |      |             | Placebo                   | 92  | -3.5  | 5.7  |
| Beauclair                | 1994 | HAM-D       | BZD                       | 12  | 5.8   | 2.2  |
|                          |      |             | Placebo                   | 14  | 12.6  | 4.7  |
| Pecknold                 | 1994 | HAM-D       | BZD                       | 69  | -8    | 9.14 |
|                          |      |             | Placebo                   | 70  | -4.3  | 6.02 |
| Savoldi                  | 1995 | HAM-D       | BZD                       | 14  | 5.1   | 1.59 |
|                          |      |             | Placebo                   | 9   | 13.22 | 2.99 |
| Pollack                  | 1996 | HAM-D       | BZD                       | 13  | 8.92  | 7.4  |
|                          |      |             | Placebo                   | 12  | 10.64 | 4.34 |
| <b>SSRIs vs placebo</b>  |      |             |                           |     |       |      |
| Michelson                | 1998 | HAM-D       | Fluoxetine                | 71  | -3.5  | 5.4  |
|                          |      |             | Placebo                   | 58  | -1.9  | 5.1  |
| Michelson                | 2001 | HAM-D       | Fluoxetine                | 90  | -6.5  | 4.7  |
|                          |      |             | Placebo                   | 90  | -4.2  | 5.8  |
| <b>MAOI vs placebo</b>   |      |             |                           |     |       |      |
| Van Vilet                | 1993 | MADRS       | MAOI                      | 15  | 6.6   | 3.4  |
|                          |      |             | Placebo                   | 14  | 9.7   | 2.5  |
| Loerch                   | 1999 | HAM-D       | MAOI                      | 16  | 12    | 7.4  |
|                          |      |             | Placebo                   | 11  | 11.09 | 7.38 |
| <b>TCA vs SSRI</b>       |      |             |                           |     |       |      |
| Lepola                   | 2003 | MADRS       | TCA                       | 69  | 11.2  | 10.4 |
|                          |      |             | Sertraline                | 138 | 11.1  | 10.8 |
| Byrtritsky               | 1995 | HAM-D       | TCA                       | 11  | 10    | 7    |
|                          |      |             | Fluoxetine                | 10  | 7     | 6    |
| Bakker                   | 1999 | MADRS       | TCA                       | 32  | 8.5   | 5.3  |
|                          |      |             | Paroxetine                | 32  | 6.7   | 7.3  |
|                          |      |             | Placebo                   | 32  | 10.2  | 6.7  |
| <b>Other comparisons</b> |      |             |                           |     |       |      |
| Broocks                  | 1998 | MADRS       | TCA                       | 15  | 6.1   | 2.9  |
|                          |      |             | Placebo                   | 15  | 17.3  | 7.4  |
| Pini                     | 2003 | HAM-D       | MAOI                      | 18  | 10.94 | 5.90 |
|                          |      |             | Paroxetine                | 14  | 7.07  | 8.23 |
| Hirschmann               | 2000 | HAM-D       | Fluoxetine + Beta-blocker | 12  | 3.7   | 1.9  |
|                          |      |             | Fluoxetine                | 11  | 8.5   | 3    |
| Pollack                  | 2003 | HAM-D       | Paroxetine                | 22  | 9.2   | 5.4  |
|                          |      |             | paroxetine + BZD          | 20  | 11.8  | 4.4  |

| <b>Author</b> | <b>Year</b> | <b>Measurement</b> | <b>Intervention</b> | <b>N</b> | <b>mean</b> | <b>SD</b> |
|---------------|-------------|--------------------|---------------------|----------|-------------|-----------|
| Seedat        | 2003        | MADRS              | NRI                 | 8        | 11.5        | 5.7       |
|               |             |                    | Citalopram          | 9        | 7.4         | 6.2       |
| Munjack       | 1989        | HAM-D              | BZD                 | 20       | 12.3        | 8.24      |
|               |             |                    | Beta-blocker        | 19       | 13.95       | 5.71      |
|               |             |                    | Placebo             | 16       | 17.31       | 10.74     |
| Sheehan       | 1993        | HAM-D              | BZD                 | 33       | 10.1        | 7         |
|               |             |                    | Buspirone           | 23       | 11.5        | 7.2       |
|               |             |                    | Placebo             | 29       | 13.3        | 6.6       |
| Sheehan       | 1990        | HAM-D              | TCA                 | 18       | 7.9         | 5.5       |
|               |             |                    | Buspirone           | 16       | 9.8         | 6.5       |
|               |             |                    | Placebo             | 18       | 11.2        | 5.3       |
| Sheikh        | 1999        | HAM-D              | TCA                 | 9        | 3.2         | 2.39      |
|               |             |                    | BZD                 | 8        | 3.88        | 6.11      |
|               |             |                    | Placebo             | 4        | 9           | 7.44      |

BZD, benzodiazepine; MAOIs, monoamine oxidase inhibitors; SSRIs, selective serotonin reuptake inhibitors; SNRIs, serotonin norepinephrine reuptake inhibitors; TCAs, tricyclic antidepressants; HAM-D, Hamilton rating scale for depression; MADRS, Montgomery-Åsberg depression rating scale

**eTable 10. Results from meta-regression of depression score**

| <b>BZDs vs placebo</b>   | <b>N</b> | <b>Tau<sup>2</sup></b> | <b>I<sup>2</sup></b> |
|--------------------------|----------|------------------------|----------------------|
| Including co-variable    |          |                        |                      |
| None                     | 8        | 4.651                  | 68.29                |
| - Percent of female      | 6        | 6.079                  | 79.57                |
| - Mean age               | 6        | 5.974                  | 78.60                |
| - Duration of treatment  | 7        | 1.044                  | 31.10                |
| - Percent of agoraphobia | 3        | 0                      | 0                    |

BZDs; benzodiazepine

**eTable 11. Treatment comparisons and data used for pooling of adverse events**

| Author                  | Year | Most common reported Adverse events | Intervention | Adverse events | No adverse events |
|-------------------------|------|-------------------------------------|--------------|----------------|-------------------|
| <b>BZDs vs placebo</b>  |      |                                     |              |                |                   |
| Tesar                   | 1991 | Sedation                            | BZD          | 15             | 9                 |
|                         |      | Sedation                            | Placebo      | 8              | 16                |
| Lydiard                 | 1992 | Sedation                            | BZD          | 7              | 23                |
|                         |      | Sedation                            | Placebo      | 7              | 26                |
| Schweizer               | 1993 | Nervousness                         | BZD          | 90             | 12                |
|                         |      | Nervousness                         | Placebo      | 36             | 56                |
| Beauclair               | 1994 | Sedation                            | BZD          | 9              | 4                 |
|                         |      | Headache                            | Placebo      | 5              | 11                |
| Pecknold                | 1994 | Sedation                            | BZD          | 59             | 10                |
|                         |      | Sedation                            | Placebo      | 34             | 35                |
| Davidson                | 1994 | Sedation                            | BZD          | 71             | 28                |
|                         |      | Sedation                            | Placebo      | 41             | 62                |
| Carter                  | 1995 | Nausea                              | BZD          | 146            | 86                |
|                         |      | Incoordination                      | placebo      | 26             | 57                |
| Savoldi                 | 1995 | Sedation                            | BZD          | 5              | 10                |
|                         |      | Dizziness                           | Placebo      | 2              | 13                |
| Noyes Jr                | 1996 | Sedation                            | BZD          | 59             | 18                |
|                         |      | Sedation                            | Placebo      | 32             | 45                |
| Rosenbaum               | 1997 | Sedation                            | BZD          | 28             | 40                |
|                         |      | Sedation                            | Placebo      | 21             | 48                |
| Moroz                   | 1999 | Sedation                            | BZD          | 105            | 125               |
|                         |      | Headache                            | Placebo      | 52             | 173               |
| Valenca                 | 2000 | Sedation                            | BZD          | 7              | 6                 |
|                         |      | Dizziness                           | Placebo      | 6              | 3                 |
| <b>SSRIs vs placebo</b> |      |                                     |              |                |                   |
| Hoehn-Saric             | 1993 | Sedation                            | Fluvoxamine  | 5              | 13                |
|                         |      | Dry mouth                           | Placebo      | 3              | 15                |
| Sandmann                | 1998 | Nausea                              | Fluvoxamine  | 9              | 14                |
|                         |      | Nausea                              | Placebo      | 6              | 17                |
| Asnis                   | 2001 | Nausea                              | Fluvoxamine  | 84             | 9                 |
|                         |      | Nausea                              | Placebo      | 70             | 25                |
| Oehrberg                | 1995 | Nausea                              | Paroxetine   | 46             | 9                 |
|                         |      | Nausea                              | Placebo      | 33             | 19                |
| Ballenger               | 1998 | Headache                            | Paroxetine   | 19             | 48                |
|                         |      | Headache                            | Placebo      | 30             | 39                |
| Sheehan                 | 2005 | Abnormal ejaculation                | Paroxetine   | 120            | 324               |

| Author                 | Year | Most common reported Adverse events | Intervention | Adverse events | No adverse events |
|------------------------|------|-------------------------------------|--------------|----------------|-------------------|
|                        |      | Nausea                              | Placebo      | 76             | 369               |
| Londborg               | 1998 | Nausea                              | Sertraline   | 42             | 85                |
|                        |      | Headache                            | Placebo      | 18             | 26                |
| Pohl                   | 1998 | Nausea                              | Sertraline   | 26             | 54                |
|                        |      | Nausea                              | Placebo      | 15             | 73                |
| Pollack                | 1998 | Insomnia                            | Sertraline   | 83             | 5                 |
|                        |      | Headache                            | Placebo      | 77             | 11                |
| Stahl                  | 2003 | Headache                            | Escitalopram | 20             | 108               |
|                        |      | Headache                            | Placebo      | 18             | 101               |
| Michelson              | 2001 | Not reported                        | Fluoxetine   | 25             | 65                |
|                        |      | Not reported                        | Placebo      | 19             | 71                |
| <b>SNRI vs placebo</b> |      |                                     |              |                |                   |
| Pollack                | 1996 | Headache                            | Venlafaxine  | 6              | 7                 |
|                        |      | Headache                            | Placebo      | 2              | 10                |
| Bradwejn               | 2005 | Insomnia                            | Venlafaxine  | 152            | 25                |
|                        |      | Dry mouth                           | Placebo      | 138            | 40                |
| Liebowitz              | 2009 | Nausea                              | Venlafaxine  | 12             | 143               |
|                        |      | Nausea                              | Placebo      | 7              | 148               |
| <b>TCAs vs BZDs</b>    |      |                                     |              |                |                   |
| Holland (adinazolam)   | 1999 | Dry mouth                           | TCA          | 41             | 87                |
|                        |      | Sedation                            | BZD          | 40             | 89                |
| Holland (alprazolam)   | 1999 | Dry mouth                           | TCA          | 77             | 72                |
|                        |      | Sedation                            | BZD          | 24             | 142               |
| Andersch               | 1991 | Dry mouth                           | TCA          | 29             | 11                |
|                        |      | Sedation                            | BZD          | 35             | 6                 |
|                        |      | Headache                            | Placebo      | 18             | 20                |
|                        | 1992 | Dry mouth                           | TCA          | 203            | 188               |
|                        |      | Sedation                            | BZD          | 224            | 162               |
|                        |      | Dry mouth                           | Placebo      | 86             | 305               |
| Schweizer              | 1993 | Dry mouth                           | TCA          | 28             | 6                 |
|                        |      | Sedation                            | BZD          | 33             | 4                 |
|                        |      | Sedation                            | Placebo      | 18             | 17                |
| <b>TCAs vs SSRIs</b>   |      |                                     |              |                |                   |
| Lepola                 | 2003 | Dry mouth                           | TCA          | 37             | 30                |
|                        |      | Nausea                              | Sertraline   | 40             | 94                |
| Nair                   | 1996 | Dry mouth                           | TCA          | 48             | 0                 |
|                        |      | Nausea                              | Fluvoxamine  | 45             | 5                 |
|                        |      | Headache                            | Placebo      | 45             | 5                 |
| Bakish                 | 1996 | Dry mouth                           | TCA          | 5              | 13                |
|                        |      | Dry mouth                           | Fluvoxamine  | 5              | 13                |



| Author                     | Year | Most common reported Adverse events | Intervention     | Adverse events | No adverse events |
|----------------------------|------|-------------------------------------|------------------|----------------|-------------------|
|                            |      | -                                   | Placebo          | 2              | 16                |
| Wade                       | 1997 | Dry mouth                           | TCA              | 32             | 66                |
|                            |      | Headache                            | Citalopram       | 32             | 65                |
|                            |      | Headache                            | Placebo          | 27             | 69                |
| Lecrubier                  | 1997 | Dry mouth                           | TCA              | 108            | 13                |
|                            |      | Sweating                            | Paroxetine       | 90             | 33                |
|                            |      | Headache                            | Placebo          | 83             | 40                |
| <b>SNRIs vs SSRIs</b>      |      |                                     |                  |                |                   |
| Pollack                    | 2007 | Not reported                        | Venlafaxine      | 138            | 22                |
|                            |      | Not reported                        | Paroxetine       | 129            | 32                |
|                            |      | Not reported                        | Placebo          | 129            | 33                |
| Pollack                    | 2007 | Sweating                            | Venlafaxine      | 117            | 41                |
|                            |      | Sedation                            | Paroxetine       | 121            | 40                |
|                            |      | Sweating                            | Placebo          | 105            | 51                |
| <b>SSRIs+BZDs vs SSRIs</b> |      |                                     |                  |                |                   |
| Goddard                    | 2001 | Sexual dysfunction                  | Sertraline + BZD | 8              | 14                |
|                            |      | Sexual dysfunction                  | Sertraline       | 8              | 16                |
| Pollack                    | 2003 | Sedation                            | Paroxetine + BZD | 17             | 3                 |
|                            |      | GI                                  | Paroxetine       | 15             | 7                 |
| <b>SSRIs vs NRIs</b>       |      |                                     |                  |                |                   |
| Bertani                    | 2004 | Sexual dysfunction                  | Paroxetine       | 15             | 15                |
|                            |      | Dry mouth                           | Reboxetine       | 12             | 15                |
| Seedat                     | 2003 | Dry mouth                           | Citalopram       | 7              | 5                 |
|                            |      | Dry mouth                           | Reboxetine       | 6              | 7                 |
| <b>SSRIs vs MAOI</b>       |      |                                     |                  |                |                   |
| Tiller                     | 1999 | Nausea                              | Fluoxetine       | 128            | 56                |
|                            |      | Headache                            | MAOI             | 115            | 67                |
| Van Vliet                  | 1996 | Nausea                              | Fluvoxamine      | 10             | 5                 |
|                            |      | Nausea                              | MAOI             | 10             | 5                 |
| <b>Other comparisons</b>   |      |                                     |                  |                |                   |
| Van Vliet                  | 1993 | Sleep disturbance                   | MAOI             | 13             | 1                 |
|                            |      | Nausea                              | Placebo          | 4              | 12                |
| Versiani                   | 2002 | Dry mouth                           | NRI              | 30             | 7                 |
|                            |      | Blurred vision                      | Placebo          | 27             | 10                |
| Woods                      | 1992 | Not reported                        | TCA + BZD        | 5              | 18                |
|                            |      | Not reported                        | TCA              | 5              | 20                |
| Kruger                     | 1999 | Dry mouth                           | TCA              | 63             | 5                 |
|                            |      | Nausea                              | MAOI             | 50             | 17                |

| <b>Author</b> | <b>Year</b> | <b>Most common reported Adverse events</b> | <b>Intervention</b> | <b>Adverse events</b> | <b>No adverse events</b> |
|---------------|-------------|--------------------------------------------|---------------------|-----------------------|--------------------------|
| Nardi         | 2011        | Sedation                                   | BZD                 | 46                    | 17                       |
|               |             | Sedation                                   | Paroxetine          | 54                    | 3                        |
| Pohl          | 1989        | Dry mouth                                  | TCA                 | 14                    | 6                        |
|               |             | Dizziness                                  | Buspirone           | 6                     | 12                       |
|               |             | Dry mouth                                  | Placebo             | 8                     | 14                       |
| Sheehan       | 1993        | Sedation                                   | BZD                 | 22                    | 12                       |
|               |             | Sedation                                   | Buspirone           | 5                     | 22                       |
|               |             | Cognitive impairment                       | Placebo             | 6                     | 25                       |
| Ribeiro       | 2001        | Sedation                                   | Mirtazapine         | 9                     | 5                        |
|               |             | Nausea                                     | Fluoxetine          | 5                     | 8                        |

BZD, benzodiazepine; MAOIs; monoamine oxidase inhibitors; NRI, norepinephrine reuptake inhibitor; SSRIs, selective serotonin reuptake inhibitors; SNRIs, serotonin norepinephrine reuptake inhibitors; TCAs, tricyclic antidepressants

**eTable 12. Results from meta-regression of adverse events**

| <b>TCAs vs placebo</b>   | <b>N</b> | <b>Tau<sup>2</sup></b> | <b>I<sup>2</sup></b> |
|--------------------------|----------|------------------------|----------------------|
| Including co-variables   |          |                        |                      |
| None                     | 8        | 0.06528                | 82.47                |
| - Percent female         | 8        | 0.07521                | 82.54                |
| - Mean age               | 7        | 0.06741                | 85.49                |
| - Percent of agoraphobia | 7        | 0.06587                | 79.28                |

TCAs; tricyclic antidepressants

**eTable 13. Estimation of the relative treatment effects (95% confidence intervals) of sensitivity analysis of adverse events**

|                |                     |                     |                     |                     |                     |                     |                     |                     |                     |
|----------------|---------------------|---------------------|---------------------|---------------------|---------------------|---------------------|---------------------|---------------------|---------------------|
| <b>Placebo</b> | 1.41<br>(0.91,2.19) | 1.96<br>(0.82,4.67) | 1.06<br>(0.76,1.48) | 1.19<br>(0.95,1.50) | 1.17<br>(1.03,1.33) | 0.69<br>(0.38,1.25) | 1.14<br>(0.86,1.53) | 1.86<br>(1.54,2.24) | 1.53<br>(1.28,1.83) |
|                | <b>SSRI+BZD</b>     | 1.38<br>(0.53,3.60) | 0.75<br>(0.44,1.29) | 0.84<br>(0.52,1.37) | 0.83<br>(0.54,1.26) | 0.49<br>(0.23,1.02) | 0.81<br>(0.49,1.34) | 1.31<br>(0.82,2.11) | 1.08<br>(0.68,1.72) |
|                |                     | <b>NaSSA</b>        | 0.54<br>(0.22,1.37) | 0.61<br>(0.25,1.49) | 0.60<br>(0.25,1.41) | 0.35<br>(0.12,1.01) | 0.59<br>(0.24,1.45) | 0.95<br>(0.39,2.30) | 0.78<br>(0.32,1.89) |
|                |                     |                     | <b>NRI</b>          | 1.12<br>(0.75,1.67) | 1.10<br>(0.79,1.54) | 0.65<br>(0.33,1.28) | 1.08<br>(0.70,1.65) | 1.75<br>(1.20,2.55) | 1.44<br>(1.00,2.09) |
|                |                     |                     |                     | <b>SNRI</b>         | 0.98<br>(0.77,1.25) | 0.58<br>(0.31,1.09) | 0.96<br>(0.67,1.37) | 1.56<br>(1.16,2.08) | 1.29<br>(0.97,1.70) |
|                |                     |                     |                     |                     | <b>SSRI</b>         | 0.59<br>(0.32,1.07) | 0.98<br>(0.74,1.29) | 1.59<br>(1.27,1.97) | 1.31<br>(1.08,1.59) |
|                |                     |                     |                     |                     |                     | <b>Buspirone</b>    | 1.66<br>(0.87,3.15) | 2.69<br>(1.49,4.85) | 2.22<br>(1.24,3.99) |
|                |                     |                     |                     |                     |                     |                     | <b>MAOI</b>         | 1.62<br>(1.18,2.23) | 1.34<br>(1.01,1.77) |
|                |                     |                     |                     |                     |                     |                     |                     | <b>BZD</b>          | 0.83<br>(0.68,1.00) |
|                |                     |                     |                     |                     |                     |                     |                     |                     | <b>TCA</b>          |

Results are risk ratios (95% confidence intervals) between each pair of treatments from network meta-analysis. Comparisons are read from right to left. For example, the risk ratio for dropout with TCA compared to BZD is 0.83 (95% CI: 0.68 to 1.00).

BZDs, benzodiazepines; MAOIs, monoamine oxidase inhibitors; NaSSA, noradrenergic and specific serotonergic antidepressants; NRI, norepinephrine reuptake inhibitor; SSRI, selective serotonin reuptake inhibitor; SNRI, serotonin norepinephrine reuptake inhibitor; TCAs, tricyclic antidepressants

**eTable 14. Evaluation of the certainty of evidence from network meta-analysis of remission for drug classes**

| Comparison             | Number of studies | Within-study bias | Reporting bias | Indirectness  | Imprecision    | Heterogeneity | Incoherence   | Confidence rating |
|------------------------|-------------------|-------------------|----------------|---------------|----------------|---------------|---------------|-------------------|
| <i>Mixed estimates</i> |                   |                   |                |               |                |               |               |                   |
| Beta-blocker:BZD       | 1                 | Major concerns    | Low risk       | Some concerns | No concerns    | Some concerns | No concerns   | Very low          |
| Bupirone:BZD           | 1                 | Major concerns    | Low risk       | No concerns   | Some concerns  | No concerns   | No concerns   | Low               |
| BZD:Placebo            | 18                | Some concerns     | Low risk       | No concerns   | No concerns    | No concerns   | No concerns   | Moderate          |
| BZD:SSRI               | 1                 | Some concerns     | Low risk       | No concerns   | No concerns    | Some concerns | No concerns   | Moderate          |
| BZD:TCA                | 6                 | Some concerns     | Low risk       | No concerns   | No concerns    | Some concerns | Some concerns | Low               |
| Beta-blocker:Placebo   | 1                 | Major concerns    | Low risk       | Some concerns | Major concerns | No concerns   | No concerns   | Very low          |
| Bupirone:Placebo       | 3                 | Major concerns    | Low risk       | No concerns   | Major concerns | No concerns   | No concerns   | Low               |
| Bupirone:TCA           | 2                 | Major concerns    | Low risk       | No concerns   | Some concerns  | Some concerns | No concerns   | Low               |
| MAOI:SSRI              | 1                 | Some concerns     | Low risk       | No concerns   | Some concerns  | Some concerns | No concerns   | Low               |

|                           |    |                |          |             |                |                |               |          |
|---------------------------|----|----------------|----------|-------------|----------------|----------------|---------------|----------|
| NRI:Placebo               | 1  | Some concerns  | Low risk | No concerns | Some concerns  | Some concerns  | Some concerns | Low      |
| NRI:SSRI                  | 1  | Major concerns | Low risk | No concerns | Major concerns | No concerns    | Some concerns | Very low |
| Placebo:SNRI              | 4  | Some concerns  | Low risk | No concerns | No concerns    | No concerns    | No concerns   | Moderate |
| Placebo:SSRI              | 18 | Some concerns  | Low risk | No concerns | No concerns    | No concerns    | No concerns   | Moderate |
| Placebo:TCA               | 12 | Some concerns  | Low risk | No concerns | No concerns    | No concerns    | No concerns   | Moderate |
| SNRI:SSRI                 | 2  | Some concerns  | Low risk | No concerns | No concerns    | Some concerns  | No concerns   | Moderate |
| SSRI:SSRI+BZD             | 1  | Some concerns  | Low risk | No concerns | Major concerns | No concerns    | No concerns   | Low      |
| SSRI:TCA                  | 5  | Some concerns  | Low risk | No concerns | No concerns    | Major concerns | No concerns   | Low      |
| <i>Indirect estimates</i> |    |                |          |             |                |                |               |          |
| BZD:MAOI                  | 0  | Some concerns  | Low risk | No concerns | Some concerns  | Some concerns  | No concerns   | Low      |
| BZD:NRI                   | 0  | Some concerns  | Low risk | No concerns | Major concerns | No concerns    | No concerns   | Low      |
| BZD:SNRI                  | 0  | Some concerns  | Low risk | No concerns | Some concerns  | No concerns    | No concerns   | Moderate |
| BZD:SSRI+BZD              | 0  | Some concerns  | Low risk | No concerns | Major concerns | No concerns    | No concerns   | Low      |

|                        |   |                |          |               |                |               |             |          |
|------------------------|---|----------------|----------|---------------|----------------|---------------|-------------|----------|
| Beta-blocker:Buspirone | 0 | Major concerns | Low risk | Some concerns | Major concerns | No concerns   | No concerns | Very low |
| Beta-blocker:MAOI      | 0 | Some concerns  | Low risk | No concerns   | Some concerns  | No concerns   | No concerns | Moderate |
| Beta-blocker:NRI       | 0 | Major concerns | Low risk | Some concerns | Major concerns | No concerns   | No concerns | Very low |
| Beta-blocker:SNRI      | 0 | Some concerns  | Low risk | No concerns   | Some concerns  | No concerns   | No concerns | Moderate |
| Beta-blocker:SSRI      | 0 | Some concerns  | Low risk | No concerns   | Some concerns  | No concerns   | No concerns | Moderate |
| Beta-blocker:SSRI+BZD  | 0 | Some concerns  | Low risk | No concerns   | Major concerns | No concerns   | No concerns | Low      |
| Beta-blocker:TCA       | 0 | Major concerns | Low risk | No concerns   | Some concerns  | No concerns   | No concerns | Low      |
| Buspirone:MAOI         | 0 | Some concerns  | Low risk | No concerns   | Major concerns | No concerns   | No concerns | Low      |
| Buspirone:NRI          | 0 | Some concerns  | Low risk | No concerns   | Major concerns | No concerns   | No concerns | Low      |
| Buspirone:SNRI         | 0 | Some concerns  | Low risk | No concerns   | Major concerns | No concerns   | No concerns | Low      |
| Buspirone:SSRI         | 0 | Some concerns  | Low risk | No concerns   | Some concerns  | Some concerns | No concerns | Low      |
| Buspirone:SSRI+BZD     | 0 | Some concerns  | Low risk | No concerns   | Major concerns | No concerns   | No concerns | Low      |
| MAOI:NRI               | 0 | Some concerns  | Low risk | No concerns   | Major concerns | No concerns   | No concerns | Low      |

|                  |   |               |          |             |                |             |             |          |
|------------------|---|---------------|----------|-------------|----------------|-------------|-------------|----------|
| MAOI:Placebo     | 0 | Some concerns | Low risk | No concerns | Some concerns  | No concerns | No concerns | Moderate |
| MAOI:SNRI        | 0 | Some concerns | Low risk | No concerns | Major concerns | No concerns | No concerns | Low      |
| MAOI:SSRI+BZD    | 0 | Some concerns | Low risk | No concerns | Major concerns | No concerns | No concerns | Low      |
| MAOI:TCA         | 0 | Some concerns | Low risk | No concerns | Major concerns | No concerns | No concerns | Low      |
| NRI:SNRI         | 0 | Some concerns | Low risk | No concerns | Major concerns | No concerns | No concerns | Low      |
| NRI:SSRI+BZD     | 0 | Some concerns | Low risk | No concerns | Major concerns | No concerns | No concerns | Low      |
| NRI:TCA          | 0 | Some concerns | Low risk | No concerns | Major concerns | No concerns | No concerns | Low      |
| Placebo:SSRI+BZD | 0 | Some concerns | Low risk | No concerns | Major concerns | No concerns | No concerns | Low      |
| SNRI:SSRI+BZD    | 0 | Some concerns | Low risk | No concerns | Major concerns | No concerns | No concerns | Low      |
| SNRI:TCA         | 0 | Some concerns | Low risk | No concerns | Some concerns  | No concerns | No concerns | Moderate |
| SSRI+BZD:TCA     | 0 | Some concerns | Low risk | No concerns | Major concerns | No concerns | No concerns | Low      |

BZDs, benzodiazepines; MAOIs, monoamine oxidase inhibitors; NRI, norepinephrine reuptake inhibitor; SSRI, selective serotonin reuptake inhibitor; SNRI, serotonin norepinephrine reuptake inhibitor; TCAs, tricyclic anti-depressants



**eTable 15. Evaluation of the certainty of evidence from network meta-analysis of drop-out for drug classes**

| <b>Comparison</b>      | <b>Number of studies</b> | <b>Within-study bias</b> | <b>Reporting bias</b> | <b>Indirectness</b> | <b>Imprecision</b> | <b>Heterogeneity</b> | <b>Incoherence</b> | <b>Confidence rating</b> |
|------------------------|--------------------------|--------------------------|-----------------------|---------------------|--------------------|----------------------|--------------------|--------------------------|
| <i>Mixed estimates</i> |                          |                          |                       |                     |                    |                      |                    |                          |
| Beta-blocker:BZD       | 1                        | Major concerns           | Low risk              | Some concerns       | Major concerns     | No concerns          | No concerns        | Very low                 |
| Buspirone:BZD          | 2                        | Some concerns            | Low risk              | No concerns         | No concerns        | No concerns          | No concerns        | Moderate                 |
| BZD:Placebo            | 24                       | Some concerns            | Low risk              | No concerns         | No concerns        | No concerns          | No concerns        | Moderate                 |
| BZD:SSRI               | 1                        | Some concerns            | Low risk              | No concerns         | No concerns        | Some concerns        | No concerns        | Moderate                 |
| BZD:TCA                | 9                        | Some concerns            | Low risk              | No concerns         | No concerns        | Major concerns       | No concerns        | Low                      |
| Beta-blocker:Placebo   | 1                        | Major concerns           | Low risk              | Some concerns       | Major concerns     | No concerns          | No concerns        | Very low                 |
| Buspirone:Placebo      | 4                        | Some concerns            | Low risk              | No concerns         | Some concerns      | Some concerns        | No concerns        | Low                      |
| Buspirone:TCA          | 3                        | Some concerns            | Low risk              | No concerns         | No concerns        | No concerns          | Major concerns     | Very low                 |
| MAOI:Placebo           | 2                        | Some concerns            | Low risk              | No concerns         | Major concerns     | No concerns          | No concerns        | Low                      |
| MAOI:SSRI              | 1                        | Some concerns            | Low risk              | No concerns         | Major concerns     | No concerns          | No concerns        | Low                      |

|                           |    |               |          |               |                |                |             |          |
|---------------------------|----|---------------|----------|---------------|----------------|----------------|-------------|----------|
| MAOI:TCA                  | 1  | Some concerns | Low risk | No concerns   | Major concerns | No concerns    | No concerns | Low      |
| NRI:Placebo               | 1  | Some concerns | Low risk | Some concerns | Major concerns | No concerns    | No concerns | Very low |
| NRI:SSRI                  | 1  | Some concerns | Low risk | No concerns   | Major concerns | No concerns    | No concerns | Low      |
| NaSSA:SSRI                | 1  | Some concerns | Low risk | No concerns   | Major concerns | No concerns    | No concerns | Low      |
| Placebo:SNRI              | 5  | Some concerns | Low risk | No concerns   | Some concerns  | Some concerns  | No concerns | Low      |
| Placebo:SSRI              | 21 | Some concerns | Low risk | No concerns   | Some concerns  | Some concerns  | No concerns | Low      |
| Placebo:TCA               | 20 | Some concerns | Low risk | No concerns   | No concerns    | Major concerns | No concerns | Low      |
| SNRI:SSRI                 | 2  | Some concerns | Low risk | No concerns   | Major concerns | No concerns    | No concerns | Low      |
| SSRI:SSRI+BZD             | 2  | Some concerns | Low risk | No concerns   | Major concerns | No concerns    | No concerns | Low      |
| SSRI:TCA                  | 7  | Some concerns | Low risk | No concerns   | No concerns    | Major concerns | No concerns | Low      |
| TCA:TCA+BZD               | 1  | Some concerns | Low risk | No concerns   | Major concerns | No concerns    | No concerns | Low      |
| <i>Indirect estimates</i> |    |               |          |               |                |                |             |          |
| BZD:MAOI                  | 0  | Some concerns | Low risk | No concerns   | No concerns    | Major concerns | No concerns | Low      |
| BZD:NRI                   | 0  | Some concerns | Low risk | No concerns   | Major concerns | No concerns    | No concerns | Low      |

|                        |   |                |          |               |                |               |             |          |
|------------------------|---|----------------|----------|---------------|----------------|---------------|-------------|----------|
| BZD:NaSSA              | 0 | Some concerns  | Low risk | No concerns   | Major concerns | No concerns   | No concerns | Low      |
| BZD:SNRI               | 0 | Some concerns  | Low risk | No concerns   | No concerns    | Some concerns | No concerns | Moderate |
| BZD:SSRI+BZD           | 0 | Some concerns  | Low risk | No concerns   | Some concerns  | Some concerns | No concerns | Low      |
| BZD:TCA+BZD            | 0 | Some concerns  | Low risk | No concerns   | Major concerns | No concerns   | No concerns | Low      |
| Beta-blocker:Buspirone | 0 | Major concerns | Low risk | Some concerns | Major concerns | No concerns   | No concerns | Very low |
| Beta-blocker:MAOI      | 0 | Some concerns  | Low risk | No concerns   | Major concerns | No concerns   | No concerns | Low      |
| Beta-blocker:NRI       | 0 | Major concerns | Low risk | Some concerns | Major concerns | No concerns   | No concerns | Very low |
| Beta-blocker:NaSSA     | 0 | Some concerns  | Low risk | No concerns   | Major concerns | No concerns   | No concerns | Low      |
| Beta-blocker:SNRI      | 0 | Some concerns  | Low risk | No concerns   | Major concerns | No concerns   | No concerns | Low      |
| Beta-blocker:SSRI      | 0 | Major concerns | Low risk | No concerns   | Major concerns | No concerns   | No concerns | Low      |
| Beta-blocker:SSRI+BZD  | 0 | Some concerns  | Low risk | No concerns   | Major concerns | No concerns   | No concerns | Low      |
| Beta-blocker:TCA       | 0 | Major concerns | Low risk | No concerns   | Major concerns | No concerns   | No concerns | Low      |
| Beta-blocker:TCA+BZD   | 0 | Some concerns  | Low risk | No concerns   | Major concerns | No concerns   | No concerns | Low      |

|                    |   |               |          |             |                |                |             |          |
|--------------------|---|---------------|----------|-------------|----------------|----------------|-------------|----------|
| Buspirone:MAOI     | 0 | Some concerns | Low risk | No concerns | Major concerns | No concerns    | No concerns | Low      |
| Buspirone:NRI      | 0 | Some concerns | Low risk | No concerns | No concerns    | Some concerns  | No concerns | Moderate |
| Buspirone:NaSSA    | 0 | Some concerns | Low risk | No concerns | Major concerns | No concerns    | No concerns | Low      |
| Buspirone:SNRI     | 0 | Some concerns | Low risk | No concerns | No concerns    | Some concerns  | No concerns | Moderate |
| Buspirone:SSRI     | 0 | Some concerns | Low risk | No concerns | No concerns    | Major concerns | No concerns | Low      |
| Buspirone:SSRI+BZD | 0 | Some concerns | Low risk | No concerns | Some concerns  | Some concerns  | No concerns | Low      |
| Buspirone:TCA+BZD  | 0 | Some concerns | Low risk | No concerns | Some concerns  | No concerns    | No concerns | Moderate |
| MAOI:NRI           | 0 | Some concerns | Low risk | No concerns | Major concerns | No concerns    | No concerns | Low      |
| MAOI:NaSSA         | 0 | Some concerns | Low risk | No concerns | Major concerns | No concerns    | No concerns | Low      |
| MAOI:SNRI          | 0 | Some concerns | Low risk | No concerns | Major concerns | No concerns    | No concerns | Low      |
| MAOI:SSRI+BZD      | 0 | Some concerns | Low risk | No concerns | Major concerns | No concerns    | No concerns | Low      |
| MAOI:TCA+BZD       | 0 | Some concerns | Low risk | No concerns | Major concerns | No concerns    | No concerns | Low      |
| NaSSA:NRI          | 0 | Some concerns | Low risk | No concerns | Major concerns | No concerns    | No concerns | Low      |

|                  |   |               |          |             |                |             |             |     |
|------------------|---|---------------|----------|-------------|----------------|-------------|-------------|-----|
| NRI:SNRI         | 0 | Some concerns | Low risk | No concerns | Major concerns | No concerns | No concerns | Low |
| NRI:SSRI+BZD     | 0 | Some concerns | Low risk | No concerns | Major concerns | No concerns | No concerns | Low |
| NRI:TCA          | 0 | Some concerns | Low risk | No concerns | Major concerns | No concerns | No concerns | Low |
| NRI:TCA+BZD      | 0 | Some concerns | Low risk | No concerns | Major concerns | No concerns | No concerns | Low |
| NaSSA:Placebo    | 0 | Some concerns | Low risk | No concerns | Major concerns | No concerns | No concerns | Low |
| NaSSA:SNRI       | 0 | Some concerns | Low risk | No concerns | Major concerns | No concerns | No concerns | Low |
| NaSSA:SSRI+BZD   | 0 | Some concerns | Low risk | No concerns | Major concerns | No concerns | No concerns | Low |
| NaSSA:TCA        | 0 | Some concerns | Low risk | No concerns | Major concerns | No concerns | No concerns | Low |
| NaSSA:TCA+BZD    | 0 | Some concerns | Low risk | No concerns | Major concerns | No concerns | No concerns | Low |
| Placebo:SSRI+BZD | 0 | Some concerns | Low risk | No concerns | Major concerns | No concerns | No concerns | Low |
| Placebo:TCA+BZD  | 0 | Some concerns | Low risk | No concerns | Major concerns | No concerns | No concerns | Low |
| SNRI:SSRI+BZD    | 0 | Some concerns | Low risk | No concerns | Major concerns | No concerns | No concerns | Low |
| SNRI:TCA         | 0 | Some concerns | Low risk | No concerns | Major concerns | No concerns | No concerns | Low |

|                  |   |               |          |             |                |             |             |     |
|------------------|---|---------------|----------|-------------|----------------|-------------|-------------|-----|
| SNRI:TCA+BZD     | 0 | Some concerns | Low risk | No concerns | Major concerns | No concerns | No concerns | Low |
| SSRI:TCA+BZD     | 0 | Some concerns | Low risk | No concerns | Major concerns | No concerns | No concerns | Low |
| SSRI+BZD:TCA     | 0 | Some concerns | Low risk | No concerns | Major concerns | No concerns | No concerns | Low |
| SSRI+BZD:TCA+BZD | 0 | Some concerns | Low risk | No concerns | Major concerns | No concerns | No concerns | Low |

BZDs, benzodiazepines; MAOIs, monoamine oxidase inhibitors; NaSSA, noradrenergic and specific serotonergic antidepressants; NRI, norepinephrine reuptake inhibitor; SSRI, selective serotonin reuptake inhibitor; SNRI, serotonin norepinephrine reuptake inhibitor; TCAs, tricyclic anti-depressant

**eTable 16. Evaluation of the certainty of evidence from network meta-analysis of adverse drug events for drug classes**

| Comparison             | Number of studies | Within-study bias | Reporting bias | Indirectness  | Imprecision    | Heterogeneity  | Incoherence    | Confidence rating |
|------------------------|-------------------|-------------------|----------------|---------------|----------------|----------------|----------------|-------------------|
| <i>Mixed estimates</i> |                   |                   |                |               |                |                |                |                   |
| Buspirone:BZD          | 1                 | Some concerns     | Some concerns  | No concerns   | No concerns    | No concerns    | No concerns    | Moderate          |
| BZD:Placebo            | 16                | Some concerns     | Some concerns  | No concerns   | No concerns    | No concerns    | Major concerns | Very low          |
| BZD:TCA                | 5                 | Some concerns     | Some concerns  | No concerns   | No concerns    | Major concerns | Major concerns | Very low          |
| Buspirone:Placebo      | 2                 | Some concerns     | Some concerns  | No concerns   | Major concerns | No concerns    | No concerns    | Low               |
| Buspirone:TCA          | 1                 | Some concerns     | Some concerns  | No concerns   | No concerns    | No concerns    | No concerns    | Moderate          |
| MAOI:SSRI              | 1                 | Some concerns     | Some concerns  | No concerns   | Major concerns | No concerns    | No concerns    | Low               |
| MAOI:TCA               | 1                 | Some concerns     | Some concerns  | No concerns   | No concerns    | Some concerns  | No concerns    | Low               |
| NRI:Placebo            | 1                 | Some concerns     | Some concerns  | Some concerns | Major concerns | No concerns    | No concerns    | Very low          |
| NRI:SSRI               | 2                 | Some concerns     | Some concerns  | No concerns   | Major concerns | No concerns    | No concerns    | Low               |
| NaSSA:SSRI             | 1                 | Some concerns     | Some concerns  | Some concerns | Major concerns | No concerns    | No concerns    | Very low          |
| Placebo:SNRI           | 4                 | Some concerns     | Some concerns  | No concerns   | Some concerns  | Some concerns  | No concerns    | Low               |
| Placebo:SSRI           | 13                | Some concerns     | Some concerns  | No concerns   | No concerns    | Major concerns | No concerns    | Low               |
| Placebo:TCA            | 6                 | Some concerns     | Some concerns  | No concerns   | No concerns    | No concerns    | No concerns    | Moderate          |
| SNRI:SSRI              | 1                 | Some concerns     | Some concerns  | No concerns   | Major concerns | No concerns    | No concerns    | Low               |

| Comparison                | Number of studies | Within-study bias | Reporting bias | Indirectness | Imprecision    | Heterogeneity | Incoherence | Confidence rating |
|---------------------------|-------------------|-------------------|----------------|--------------|----------------|---------------|-------------|-------------------|
| SSRI:SSRI+BZD             | 2                 | Some concerns     | Some concerns  | No concerns  | Major concerns | No concerns   | No concerns | Low               |
| SSRI:TCA                  | 3                 | Some concerns     | Some concerns  | No concerns  | No concerns    | Some concerns | No concerns | Low               |
| TCA:TCA+BZD               | 1                 | Some concerns     | Some concerns  | No concerns  | Major concerns | No concerns   | No concerns | Low               |
| <i>Indirect estimates</i> |                   |                   |                |              |                |               |             |                   |
| BZD:MAOI                  | 0                 | Some concerns     | Some concerns  | No concerns  | No concerns    | Some concerns | No concerns | Low               |
| BZD:NRI                   | 0                 | Some concerns     | Some concerns  | No concerns  | No concerns    | Some concerns | No concerns | Low               |
| BZD:NaSSA                 | 0                 | Some concerns     | Some concerns  | No concerns  | Major concerns | No concerns   | No concerns | Low               |
| BZD:SNRI                  | 0                 | Some concerns     | Some concerns  | No concerns  | No concerns    | Some concerns | No concerns | Low               |
| BZD:SSRI                  | 0                 | Some concerns     | Some concerns  | No concerns  | No concerns    | Some concerns | No concerns | Low               |
| BZD:SSRI+BZD              | 0                 | Some concerns     | Some concerns  | No concerns  | Major concerns | No concerns   | No concerns | Low               |
| BZD:TCA+BZD               | 0                 | Some concerns     | Some concerns  | No concerns  | Major concerns | No concerns   | No concerns | Low               |
| Buspirone:MAOI            | 0                 | Some concerns     | Some concerns  | No concerns  | Some concerns  | Some concerns | No concerns | Low               |
| Buspirone:NRI             | 0                 | Some concerns     | Some concerns  | No concerns  | Major concerns | No concerns   | No concerns | Low               |
| Buspirone:NaSSA           | 0                 | Some concerns     | Some concerns  | No concerns  | Some concerns  | No concerns   | No concerns | Low               |
| Buspirone:SNRI            | 0                 | Some concerns     | Some concerns  | No concerns  | Some concerns  | Some concerns | No concerns | Low               |
| Buspirone:SSRI            | 0                 | Some concerns     | Some concerns  | No concerns  | Some concerns  | Some concerns | No concerns | Low               |
| Buspirone:SSRI+BZD        | 0                 | Some concerns     | Some concerns  | No concerns  | Some concerns  | No concerns   | No concerns | Low               |



| Comparison        | Number of studies | Within-study bias | Reporting bias | Indirectness  | Imprecision    | Heterogeneity | Incoherence | Confidence rating |
|-------------------|-------------------|-------------------|----------------|---------------|----------------|---------------|-------------|-------------------|
| Buspirone:TCA+BZD | 0                 | Some concerns     | Some concerns  | No concerns   | Major concerns | No concerns   | No concerns | Low               |
| MAOI:NRI          | 0                 | Some concerns     | Some concerns  | No concerns   | Major concerns | No concerns   | No concerns | Low               |
| MAOI:NaSSA        | 0                 | Some concerns     | Some concerns  | No concerns   | Major concerns | No concerns   | No concerns | Low               |
| MAOI:Placebo      | 0                 | Some concerns     | Some concerns  | No concerns   | Some concerns  | Some concerns | No concerns | Low               |
| MAOI:SNRI         | 0                 | Some concerns     | Some concerns  | No concerns   | Major concerns | No concerns   | No concerns | Low               |
| MAOI:SSRI+BZD     | 0                 | Some concerns     | Some concerns  | No concerns   | Major concerns | No concerns   | No concerns | Low               |
| MAOI:TCA+BZD      | 0                 | Some concerns     | Some concerns  | No concerns   | Major concerns | No concerns   | No concerns | Low               |
| NaSSA:NRI         | 0                 | Some concerns     | Some concerns  | Some concerns | Major concerns | No concerns   | No concerns | Very low          |
| NRI:SNRI          | 0                 | Some concerns     | Some concerns  | No concerns   | Major concerns | No concerns   | No concerns | Low               |
| NRI:SSRI+BZD      | 0                 | Some concerns     | Some concerns  | No concerns   | Major concerns | No concerns   | No concerns | Low               |
| NRI:TCA           | 0                 | Some concerns     | Some concerns  | No concerns   | No concerns    | Some concerns | No concerns | Moderate          |
| NRI:TCA+BZD       | 0                 | Some concerns     | Some concerns  | No concerns   | Major concerns | No concerns   | No concerns | Low               |
| NaSSA:Placebo     | 0                 | Some concerns     | Some concerns  | No concerns   | Some concerns  | Some concerns | No concerns | Low               |
| NaSSA:SNRI        | 0                 | Some concerns     | Some concerns  | No concerns   | Major concerns | No concerns   | No concerns | Low               |
| NaSSA:SSRI+BZD    | 0                 | Some concerns     | Some concerns  | Some concerns | Major concerns | No concerns   | No concerns | Very low          |
| NaSSA:TCA         | 0                 | Some concerns     | Some concerns  | No concerns   | Major concerns | No concerns   | No concerns | Low               |

| Comparison       | Number of studies | Within-study bias | Reporting bias | Indirectness | Imprecision    | Heterogeneity | Incoherence | Confidence rating |
|------------------|-------------------|-------------------|----------------|--------------|----------------|---------------|-------------|-------------------|
| NaSSA:TCA+BZD    | 0                 | Some concerns     | Some concerns  | No concerns  | Major concerns | No concerns   | No concerns | Low               |
| Placebo:SSRI+BZD | 0                 | Some concerns     | Some concerns  | No concerns  | Some concerns  | Some concerns | No concerns | Low               |
| Placebo:TCA+BZD  | 0                 | Some concerns     | Some concerns  | No concerns  | Major concerns | No concerns   | No concerns | Low               |
| SNRI:SSRI+BZD    | 0                 | Some concerns     | Some concerns  | No concerns  | Major concerns | No concerns   | No concerns | Low               |
| SNRI:TCA         | 0                 | Some concerns     | Some concerns  | No concerns  | No concerns    | Some concerns | No concerns | Low               |
| SNRI:TCA+BZD     | 0                 | Some concerns     | Some concerns  | No concerns  | Major concerns | No concerns   | No concerns | Low               |
| SSRI:TCA+BZD     | 0                 | Some concerns     | Some concerns  | No concerns  | Major concerns | No concerns   | No concerns | Low               |
| SSRI+BZD:TCA     | 0                 | Some concerns     | Some concerns  | No concerns  | Major concerns | No concerns   | No concerns | Low               |
| SSRI+BZD:TCA+BZD | 0                 | Some concerns     | Some concerns  | No concerns  | Major concerns | No concerns   | No concerns | Low               |

BZDs, benzodiazepines; MAOIs, monoamine oxidase inhibitors; NaSSA, noradrenergic and specific serotonergic antidepressants; NRI, norepinephrine reuptake inhibitor; SSRI, selective serotonin reuptake inhibitor; SNRI, serotonin norepinephrine reuptake inhibitor; TCAs, tricyclic anti-depressants

**eTable 17.** Evaluation of the certainty of evidence from network meta-analysis of remission for individual SSRIs

| Comparison                | Number of studies | Within-study bias | Reporting bias | Indirectness  | Imprecision    | Heterogeneity | Incoherence | Confidence rating |
|---------------------------|-------------------|-------------------|----------------|---------------|----------------|---------------|-------------|-------------------|
| <i>Mixed estimates</i>    |                   |                   |                |               |                |               |             |                   |
| Citalopram:Escitalopram   | 1                 | Some concerns     | Low risk       | No concerns   | Some concerns  | Some concerns | No concerns | Low               |
| Citalopram:Fluoxetine     | 1                 | Major concerns    | Low risk       | Some concerns | Some concerns  | Some concerns | No concerns | Very low          |
| Citalopram:Paroxetine     | 2                 | Some concerns     | Low risk       | No concerns   | Some concerns  | Some concerns | No concerns | Low               |
| Citalopram:Placebo        | 1                 | Some concerns     | Low risk       | No concerns   | Some concerns  | Some concerns | No concerns | Low               |
| Escitalopram:Placebo      | 1                 | Some concerns     | Low risk       | No concerns   | Some concerns  | Some concerns | No concerns | Low               |
| Fluoxetine:Placebo        | 2                 | Some concerns     | Low risk       | No concerns   | No concerns    | Some concerns | No concerns | Moderate          |
| Fluvoxamine:Placebo       | 5                 | Some concerns     | Low risk       | No concerns   | No concerns    | Some concerns | No concerns | Moderate          |
| Paroxetine:Paroxetine+BZD | 1                 | Some concerns     | Low risk       | No concerns   | Major concerns | No concerns   | No concerns | Low               |
| Paroxetine:Placebo        | 7                 | Some concerns     | Low risk       | No concerns   | No concerns    | Some concerns | No concerns | Moderate          |
| Placebo:Sertraline        | 3                 | Some concerns     | Low risk       | No concerns   | No concerns    | Some concerns | No concerns | Moderate          |
| <i>Indirect estimates</i> |                   |                   |                |               |                |               |             |                   |
| Citalopram:Fluvoxamine    | 0                 | Some concerns     | Low risk       | No concerns   | Some concerns  | Some concerns | No concerns | Low               |
| Citalopram:Paroxetine+BZD | 0                 | Some concerns     | Low risk       | No concerns   | Major concerns | No concerns   | No concerns | Low               |
| Citalopram:Sertraline     | 0                 | Some concerns     | Low risk       | No concerns   | Major concerns | No concerns   | No concerns | Low               |
| Escitalopram:Fluoxetine   | 0                 | Some concerns     | Low risk       | No concerns   | Major concerns | No concerns   | No concerns | Low               |

| Comparison                  | Number of studies | Within-study bias | Reporting bias | Indirectness | Imprecision    | Heterogeneity | Incoherence | Confidence rating |
|-----------------------------|-------------------|-------------------|----------------|--------------|----------------|---------------|-------------|-------------------|
| Escitalopram:Fluvoxamine    | 0                 | Some concerns     | Low risk       | No concerns  | Major concerns | No concerns   | No concerns | Low               |
| Escitalopram:Paroxetine     | 0                 | Some concerns     | Low risk       | No concerns  | Major concerns | No concerns   | No concerns | Low               |
| Escitalopram:Paroxetine+BZD | 0                 | Some concerns     | Low risk       | No concerns  | Major concerns | No concerns   | No concerns | Low               |
| Escitalopram:Sertraline     | 0                 | Some concerns     | Low risk       | No concerns  | Major concerns | No concerns   | No concerns | Low               |
| Fluoxetine:Fluvoxamine      | 0                 | Some concerns     | Low risk       | No concerns  | Major concerns | No concerns   | No concerns | Low               |
| Fluoxetine:Paroxetine       | 0                 | Some concerns     | Low risk       | No concerns  | Major concerns | No concerns   | No concerns | Low               |
| Fluoxetine:Paroxetine+BZD   | 0                 | Some concerns     | Low risk       | No concerns  | Major concerns | No concerns   | No concerns | Low               |
| Fluoxetine:Sertraline       | 0                 | Some concerns     | Low risk       | No concerns  | Major concerns | No concerns   | No concerns | Low               |
| Fluvoxamine:Paroxetine      | 0                 | Some concerns     | Low risk       | No concerns  | Major concerns | No concerns   | No concerns | Low               |
| Fluvoxamine:Paroxetine+BZD  | 0                 | Some concerns     | Low risk       | No concerns  | Major concerns | No concerns   | No concerns | Low               |
| Fluvoxamine:Sertraline      | 0                 | Some concerns     | Low risk       | No concerns  | Major concerns | No concerns   | No concerns | Low               |
| Paroxetine:Sertraline       | 0                 | Some concerns     | Low risk       | No concerns  | Major concerns | No concerns   | No concerns | Low               |
| Paroxetine+BZD:Placebo      | 0                 | Some concerns     | Low risk       | No concerns  | Major concerns | No concerns   | No concerns | Low               |
| Paroxetine+BZD:Sertraline   | 0                 | Some concerns     | Low risk       | No concerns  | Major concerns | No concerns   | No concerns | Low               |

BZD, benzodiazepine

**eTable 18.** Evaluation of the certainty of evidence from network meta-analysis of adverse drug events for individual SSRIs

| Comparison                | Number of studies | Within-study bias | Reporting bias | Indirectness | Imprecision    | Heterogeneity  | Incoherence | Confidence rating |
|---------------------------|-------------------|-------------------|----------------|--------------|----------------|----------------|-------------|-------------------|
| <i>Mixed estimates</i>    |                   |                   |                |              |                |                |             |                   |
| Citalopram:Escitalopram   | 1                 | Some concerns     | Low risk       | No concerns  | Some concerns  | Some concerns  | No concerns | Low               |
| Citalopram:Paroxetine     | 1                 | Some concerns     | Low risk       | No concerns  | Major concerns | No concerns    | No concerns | Low               |
| Citalopram:Placebo        | 2                 | Some concerns     | Low risk       | No concerns  | Some concerns  | No concerns    | No concerns | Moderate          |
| Escitalopram:Placebo      | 1                 | Some concerns     | Low risk       | No concerns  | Major concerns | No concerns    | No concerns | Low               |
| Fluoxetine:Placebo        | 1                 | Some concerns     | Low risk       | No concerns  | Major concerns | No concerns    | No concerns | Low               |
| Fluvoxamine:Placebo       | 5                 | Some concerns     | Low risk       | No concerns  | Some concerns  | No concerns    | No concerns | Moderate          |
| Paroxetine:Paroxetine+BZD | 1                 | Some concerns     | Low risk       | No concerns  | Some concerns  | Some concerns  | No concerns | Low               |
| Paroxetine:Placebo        | 6                 | Some concerns     | Low risk       | No concerns  | No concerns    | Some concerns  | No concerns | Moderate          |
| Paroxetine:Sertraline     | 2                 | Some concerns     | Low risk       | No concerns  | No concerns    | Major concerns | No concerns | Low               |
| Placebo:Sertraline        | 3                 | Some concerns     | Low risk       | No concerns  | Some concerns  | No concerns    | No concerns | Moderate          |
| Sertraline:Sertraline+BZD | 1                 | Some concerns     | Low risk       | No concerns  | Major concerns | No concerns    | No concerns | Low               |
| <i>Indirect estimates</i> |                   |                   |                |              |                |                |             |                   |
| Citalopram:Fluoxetine     | 0                 | Some concerns     | Low risk       | No concerns  | Major concerns | No concerns    | No concerns | Low               |
| Citalopram:Fluvoxamine    | 0                 | Some concerns     | Low risk       | No concerns  | Major concerns | No concerns    | No concerns | Low               |

| Comparison                  | Number of studies | Within-study bias | Reporting bias | Indirectness | Imprecision    | Heterogeneity  | Incoherence | Confidence rating |
|-----------------------------|-------------------|-------------------|----------------|--------------|----------------|----------------|-------------|-------------------|
| Citalopram:Paroxetine+BZD   | 0                 | Some concerns     | Low risk       | No concerns  | Major concerns | No concerns    | No concerns | Low               |
| Citalopram:Sertraline       | 0                 | Some concerns     | Low risk       | No concerns  | Major concerns | No concerns    | No concerns | Low               |
| Citalopram:Sertraline+BZD   | 0                 | Some concerns     | Low risk       | No concerns  | Major concerns | No concerns    | No concerns | Low               |
| Escitalopram:Fluoxetine     | 0                 | Some concerns     | Low risk       | No concerns  | Major concerns | No concerns    | No concerns | Low               |
| Escitalopram:Fluvoxamine    | 0                 | Some concerns     | Low risk       | No concerns  | Major concerns | No concerns    | No concerns | Low               |
| Escitalopram:Paroxetine     | 0                 | Some concerns     | Low risk       | No concerns  | Major concerns | No concerns    | No concerns | Low               |
| Escitalopram:Paroxetine+BZD | 0                 | Some concerns     | Low risk       | No concerns  | Some concerns  | Some concerns  | No concerns | Low               |
| Escitalopram:Sertraline     | 0                 | Some concerns     | Low risk       | No concerns  | Major concerns | No concerns    | No concerns | Low               |
| Escitalopram:Sertraline+BZD | 0                 | Some concerns     | Low risk       | No concerns  | Major concerns | No concerns    | No concerns | Low               |
| Fluoxetine:Fluvoxamine      | 0                 | Some concerns     | Low risk       | No concerns  | Major concerns | No concerns    | No concerns | Low               |
| Fluoxetine:Paroxetine       | 0                 | Some concerns     | Low risk       | No concerns  | Major concerns | No concerns    | No concerns | Low               |
| Fluoxetine:Paroxetine+BZD   | 0                 | Some concerns     | Low risk       | No concerns  | Major concerns | No concerns    | No concerns | Low               |
| Fluoxetine:Sertraline       | 0                 | Some concerns     | Low risk       | No concerns  | Major concerns | No concerns    | No concerns | Low               |
| Fluoxetine:Sertraline+BZD   | 0                 | Some concerns     | Low risk       | No concerns  | Major concerns | No concerns    | No concerns | Low               |
| Fluvoxamine:Paroxetine      | 0                 | Some concerns     | Low risk       | No concerns  | No concerns    | Major concerns | No concerns | Low               |
| Fluvoxamine:Paroxetine+BZD  | 0                 | Some concerns     | Low risk       | No concerns  | Major concerns | No concerns    | No concerns | Low               |

| Comparison                    | Number of studies | Within-study bias | Reporting bias | Indirectness | Imprecision    | Heterogeneity | Incoherence | Confidence rating |
|-------------------------------|-------------------|-------------------|----------------|--------------|----------------|---------------|-------------|-------------------|
| Fluvoxamine:Sertraline        | 0                 | Some concerns     | Low risk       | No concerns  | Some concerns  | Some concerns | No concerns | Low               |
| Fluvoxamine:Sertraline+BZD    | 0                 | Some concerns     | Low risk       | No concerns  | Major concerns | No concerns   | No concerns | Low               |
| Paroxetine:Sertraline+BZD     | 0                 | Some concerns     | Low risk       | No concerns  | Major concerns | No concerns   | No concerns | Low               |
| Paroxetine+BZD:Placebo        | 0                 | Some concerns     | Low risk       | No concerns  | Some concerns  | No concerns   | No concerns | Low               |
| Paroxetine+BZD:Sertraline     | 0                 | Some concerns     | Low risk       | No concerns  | Some concerns  | Some concerns | No concerns | Low               |
| Paroxetine+BZD:Sertraline+BZD | 0                 | Some concerns     | Low risk       | No concerns  | Major concerns | No concerns   | No concerns | Low               |
| Placebo:Sertraline+BZD        | 0                 | Some concerns     | Low risk       | No concerns  | Major concerns | No concerns   | No concerns | Low               |

BZD, benzodiazepine

**eTable 19.** Comparisons of one-stage and two-stage network meta-analyses for outcomes with zero events

| Treatment comparisons      | One-stage approach       | Two-stage approach       |
|----------------------------|--------------------------|--------------------------|
|                            | RR (95% CI)              | RR (95% CI)              |
| <i>Dropout</i>             |                          |                          |
| <b>TCA vs placebo</b>      | <b>0.71 (0.64, 0.79)</b> | <b>0.71 (0.58, 0.88)</b> |
| <b>BZD vs placebo</b>      | <b>0.46 (0.41, 0.52)</b> | <b>0.46 (0.37, 0.58)</b> |
| Beta-blocker vs placebo    | 0.90 (0.11, 1.69)        | 0.81 (0.23, 2.81)        |
| <b>MAOI vs placebo</b>     | <b>0.85 (0.50, 1.20)</b> | <b>0.99 (0.49, 2.02)</b> |
| Buspirone vs placebo       | 1.37 (0.97, 1.74)        | 1.79 (0.97, 3.31)        |
| SSRI vs placebo            | 0.71 (0.83, 0.99)        | 0.92 (0.77,1.10)         |
| SNRI                       | 0.89 (0.75, 1.03)        | 0.81 (0.56,1.18)         |
| NRI                        | 0.66 (0.32, 1.01)        | 0.70 (0.33,1.47)         |
| NaSSA                      | 0.54 (0.01, 1.28)        | 0.57 (0.10, 3.34)        |
| TCA+BZD                    | 0.59 (0.06, 1.12)        | 0.52 (0.17,1.59)         |
| SSRI+BZD                   | 0.91 (0.43, 1.39)        | 0.82 (0.40,1.67)         |
| <i>Adverse drug events</i> |                          |                          |
| <b>TCA vs placebo</b>      | <b>1.75 (1.55, 1.94)</b> | <b>1.79 (1.47,2.19)</b>  |
| BZD vs placebo             | 1.67 (1.51, 1.83)        | 1.76 (1.50,2.06)         |
| MAOI vs placebo            | 1.07 (0.86, 1.29)        | 1.25 (0.84, 1.85)        |
| Buspirone vs placebo       | 0.84 (0.48, 1.21)        | 0.73 (0.39, 1.38)        |
| SSRI vs placebo            | 1.19 (1.09, 1.30)        | 1.19 (1.01, 1.41)        |
| SNRI                       | 1.31 (1.13, 1.51)        | 1.24 (0.90, 1.69)        |
| NRI                        | 1.16 (0.81, 1.51)        | 1.06 (0.71, 1.60)        |
| NaSSA                      | 1.73 (0.98, 2.48)        | 1.99 (0.77, 5.14)        |
| TCA+BZD                    | 1.64 (0.98, 2.31)        | 1.94 (0.57, 6.63)        |
| SSRI+BZD                   | 1.46 (0.97, 1.95)        | 1.43 (0.84, 2.45)        |

\*Bold letters represent comparisons with zero cells



**eFigure 1. Risk of bias summary for all included studies**

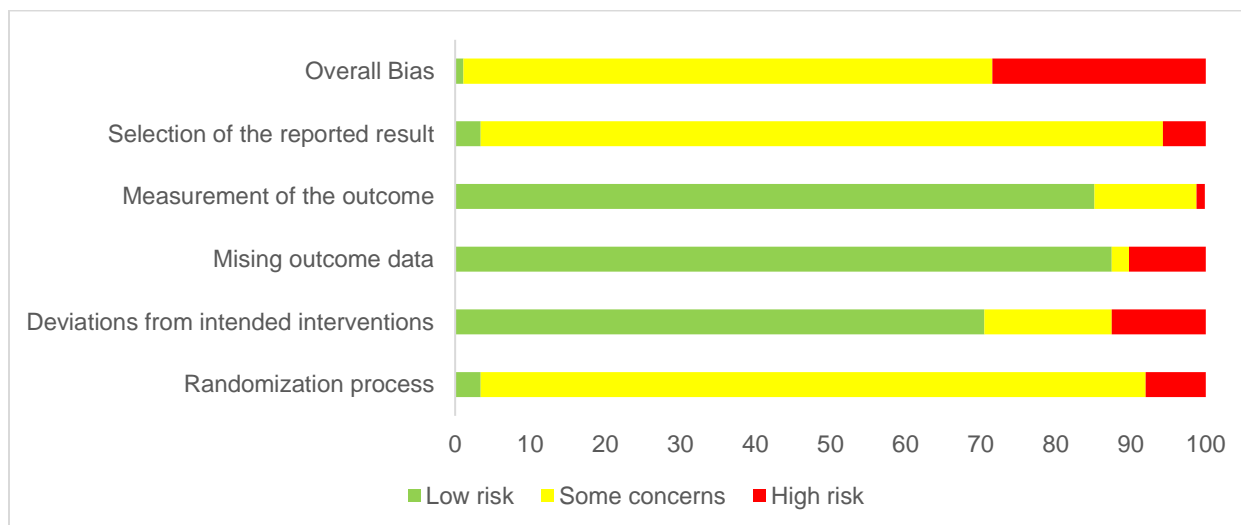

**eFigure 2. Risk of bias analysis for individual studies**

| Studies            | Experimental | Comparator | Randomization process | Deviations from intended interventions | Missing outcome data | Measurement of the outcome | Selection of the reported result | Overall |
|--------------------|--------------|------------|-----------------------|----------------------------------------|----------------------|----------------------------|----------------------------------|---------|
| Lydiard 1993       | Desipramine  | Placebo    | ?                     | +                                      | +                    | +                          | ?                                | !       |
| Mavissakalian 1995 | Imipramine   | Placebo    | ?                     | -                                      | -                    | +                          | ?                                | -       |
| Caillard 1999      | Clomipramine | Placebo    | ?                     | +                                      | +                    | +                          | ?                                | !       |
| Bandelow 2000      | Clomipramine | Placebo    | ?                     | +                                      | +                    | +                          | ?                                | !       |
| Barlow 2000        | Imipramine   | Placebo    | ?                     | +                                      | +                    | +                          | ?                                | !       |
| Ballenger 1988     | Alprazolam   | Placebo    | +                     | +                                      | +                    | +                          | +                                | +       |
| Ciraulo 1990       | Alprazolam   | Placebo    | -                     | +                                      | +                    | ?                          | ?                                | -       |
| Klosko 1990        | Alprazolam   | Placebo    | -                     | +                                      | +                    | +                          | ?                                | -       |
| Tesar 1991         | Alprazolam   | Placebo    | ?                     | +                                      | +                    | +                          | ?                                | !       |
| Lydiard 1992       | Alprazolam   | Placebo    | -                     | +                                      | +                    | +                          | ?                                | -       |
| Schweizer 1993     | Alprazolam   | Placebo    | ?                     | +                                      | +                    | +                          | ?                                | !       |
| Pecknold 1994      | Alprazolam   | Placebo    | ?                     | +                                      | +                    | +                          | ?                                | !       |
| Beauchair 1994     | Clonazepam   | Placebo    | ?                     | +                                      | +                    | +                          | ?                                | !       |
| Davidson 1994      | Adinazolam   | Placebo    | ?                     | +                                      | +                    | ?                          | ?                                | !       |
| Carter 1995        | Adinazolam   | Placebo    | ?                     | +                                      | +                    | +                          | ?                                | !       |
| Savoldi 1995       | Etizolam     | Placebo    | ?                     | -                                      | +                    | +                          | ?                                | -       |
| Noyes Jr 1996      | Alprazolam   | Placebo    | ?                     | +                                      | +                    | +                          | ?                                | !       |
| Rosenbaum 1997     | Clonazepam   | Placebo    | ?                     | +                                      | +                    | +                          | ?                                | !       |
| Moroz 1999         | Clonazepam   | Placebo    | ?                     | +                                      | +                    | +                          | ?                                | !       |
| Valenca 2000       | Clonazepam   | Placebo    | ?                     | ?                                      | +                    | ?                          | ?                                | !       |
| Valenca 2003       | Clonazepam   | Placebo    | ?                     | ?                                      | +                    | +                          | ?                                | !       |
| Oehrberg 1995      | Paroxetine   | Placebo    | ?                     | +                                      | +                    | +                          | ?                                | !       |
| Ballenger 1998     | Paroxetine   | Placebo    | ?                     | +                                      | +                    | +                          | ?                                | !       |
| Bergink 2005       | paroxetine   | Placebo    | ?                     | +                                      | +                    | +                          | ?                                | !       |
| Sheehan 2005       | Paroxetine   | Placebo    | ?                     | +                                      | +                    | +                          | ?                                | !       |
| Hendriks 2010      | Paroxetine   | Waitlist   | +                     | +                                      | +                    | ?                          | ?                                | !       |
| Westenberg 1989    | Fluvoxamine  | Placebo    | ?                     | ?                                      | +                    | ?                          | ?                                | !       |
| Black 1993         | Fluvoxamine  | Placebo    | -                     | +                                      | +                    | +                          | ?                                | -       |
| Hoehn-Saric 1993   | Fluvoxamine  | Placebo    | ?                     | ?                                      | ?                    | ?                          | ?                                | -       |
| Sandmann 1998      | Fluvaxamine  | Placebo    | ?                     | +                                      | +                    | +                          | ?                                | !       |
| Asnis 2001         | Fluvoxamine  | Placebo    | ?                     | +                                      | +                    | +                          | ?                                | !       |

 Low risk  
 Some concerns  
 High risk

|                 |                          |              |   |   |   |   |   |   |
|-----------------|--------------------------|--------------|---|---|---|---|---|---|
| Sharp 1996      | Fluvoxamine              | Placebo      | ? | - | - | + | - | - |
| Michelson 1998  | Fluoxetine               | Placebo      | ? | + | + | + | ? | ! |
| Michelson 2001  | Fluoxetine               | Placebo      | ? | ? | + | + | ? | ! |
| Pohl 1998       | Sertraline               | Placebo      | ? | + | + | + | ? | ! |
| Londberg 1998   | Sertraline               | Placebo      | ? | + | + | + | ? | ! |
| Pollack 1998    | Sertraline               | Placebo      | ? | + | + | + | ? | ! |
| Pollack 1996    | Venlafaxine              | Placebo      | ? | + | + | + | ? | ! |
| Bradwejn 2005   | Venlafaxine              | Placebo      | ? | + | + | + | ? | ! |
| Liebowitz 2009  | Venlafaxine              | Placebo      | ? | + | + | + | + | ! |
| Van Vliet 1993  | Brofaromine              | Placebo      | ? | ? | + | + | ? | ! |
| Loerch 1999     | Moclobemide              | Placebo      | ? | + | + | + | ? | ! |
| Holland 1999    | Alprazolam               | Clomipramine | ? | ? | - | + | ? | - |
| Holland 1999    | Adinazolam               | Clomipramine | ? | + | + | ? | ? | ! |
| Uhlenhuth 1989  | Alprazolam               | Imipramine   | ? | + | + | + | ? | ! |
| Taylor 1990     | Alprazolam, Imipramine   | Placebo      | ? | ? | - | + | ? | - |
| Andersch 1991   | Imipramine               | Alprazolam   | - | + | + | + | ? | - |
| 1992            | Alprazolam, Imipramine   | Placebo      | ? | + | + | + | + | ! |
| Keller 1993     | Alprazolam, Imipramine   | Placebo      | ? | + | + | + | ? | ! |
| Schweizer 1993  | Alprazolam               | Imipramine   | ? | ? | + | ? | ? | ! |
| Sheikh 1999     | Alprazolam, Imipramine   | Placebo      | ? | - | + | + | ? | - |
| Amore 1999      | Fluoxetine               | Citalopram   | ? | + | + | + | - | - |
| 2010            | Sertraline               | Paroxetine   | ? | ? | ? | + | ? | ! |
| Bandelow 2004   | Sertraline               | Paroxetine   | ? | + | + | + | ? | ! |
| Perna 2001      | Citalopram               | Paroxetine   | ? | - | + | + | ? | - |
| Marchesi 2006   | Paroxetine               | Citalopram   | ? | - | + | + | ? | - |
| Stahl 2003      | Escitalopram             | Placebo      | ? | ? | + | + | ? | ! |
| Bystritsky 1995 | Desipramine              | Fluoxetine   | ? | + | + | + | ? | ! |
| Amore 1999      | Imipramine               | Fluoxetine   | ? | + | + | + | - | - |
| Lepola 2003     | Sertraline               | Imipramine   | ? | + | + | + | ? | ! |
| Bakker 1999     | Paroxetine, Clomipramine | Placebo      | - | + | + | + | ? | - |
| Lecrubier 1997  | Paroxetine, Clomipramine | Placebo      | ? | + | + | ? | ? | ! |
| Nair 1996       | Fluvoxamine, Imipramine  | Placebo      | ? | + | + | + | ? | ! |
| Bakish 1996     | Fluvoxamine              | Imipramine   | ? | - | - | + | ? | - |
| Wade 1997       | Citalopram, Clomipramine | Placebo      | ? | + | + | + | ? | ! |
| Fisekovic 2005  | Sertraline               | Alprazolam   | ? | ? | - | ? | ? | - |
| Nardi 2011      | Clonazepam               | Paroxetine   | ? | + | + | + | ? | ! |
| Ravaris 1991    | Alprazolam               | Propranolol  | ? | - | - | - | - | - |
| Munjack 1989    | Alprazolam               | Placebo      | ? | - | - | + | ? | - |
| Pini 2003       | Paroxetine               | Moclobemide  | + | ? | + | + | ? | ! |
| Tiller 1999     | Moclobemide              | Fluoxetine   | ? | + | + | ? | ? | ! |

|                 |                         |              |   |   |   |   |   |   |
|-----------------|-------------------------|--------------|---|---|---|---|---|---|
| van Vliet 1996  | Brofaromine             | Fluvoxamine  | ? | + | + | + | ? | ! |
| Pollack 2007    | Venlafaxine, Paroxetine | Placebo      | ? | + | + | + | ? | ! |
| Pollack 2007    | Venlafaxine, Paroxetine | Placebo      | ? | + | + | + | ? | ! |
| Bertani 2004    | Paroxetine              | Reboxetine   | ? | - | + | + | ? | - |
| Seedat 2003     | Reboxetine              | Citalopram   | ? | ? | + | + | ? | ! |
| Goddard 2001    | Sertraline + Clonazepam | Sertraline   | ? | + | + | + | ? | ! |
| Pollack 2003    | Paroxetine + Clonazepam | Paroxetine   | ? | + | + | + | ? | ! |
| Robinson 1989   | Buspirone, Imipramine   | Placebo      | ? | + | + | ? | ? | ! |
| Pohl 1989       | Buspirone               | Placebo      | ? | + | + | + | ? | ! |
| Schweizer 1988  | Buspirone               | Clorazepate  | ? | - | - | + | ? | - |
| Sheehan 1990    | Buspirone, Imipramine   | Placebo      | - | + | + | + | ? | - |
| Sheehan 1993    | Alprazolam              | Placebo      | ? | ? | + | + | - | - |
| Woods 1992      | Alprazolam, Imipramine  | Placebo      | ? | + | + | + | ? | ! |
| Kruger 1999     | Moclobemide             | Clomipramine | ? | + | + | + | ? | ! |
| Hirschmann 2000 | Fluoxetine + pindolol   | Fluoxetine   | ? | + | + | + | ? | ! |
| Ribeiro 2001    | Mirtazapine             | Fluoxetine   | ? | + | + | + | ? | ! |
| Versiani 2002   | Reboxetine              | Placebo      | ? | + | + | + | ? | ! |



eFigure 4. Subgroup analyses of paroxetine vs placebo and venlafaxine vs placebo

a) Paroxetine vs placebo; Duration of treatment

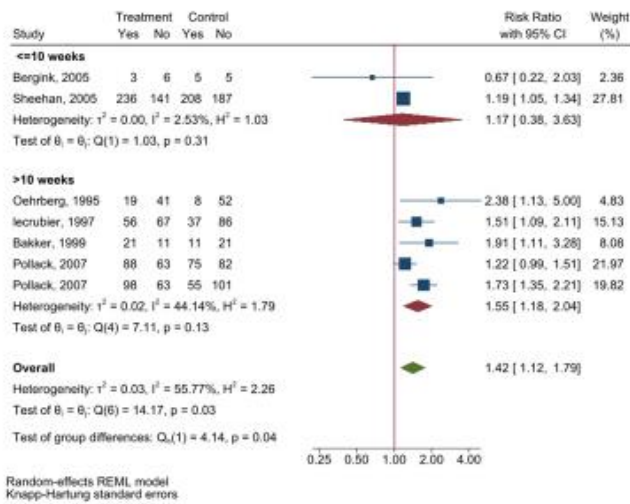

b) Venlafaxine vs placebo; Duration of treatment

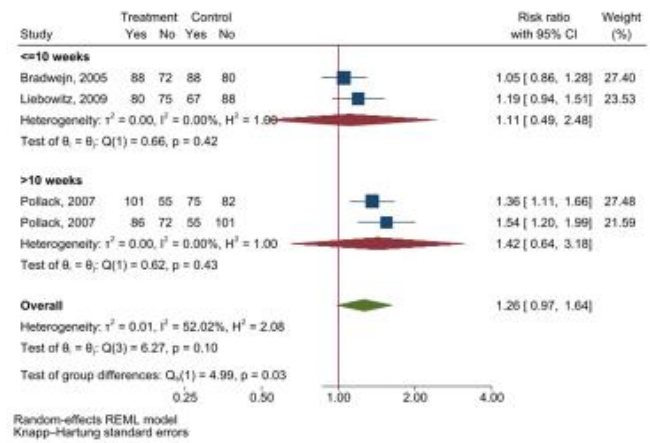

c) Venlafaxine vs placebo; Percentage of female

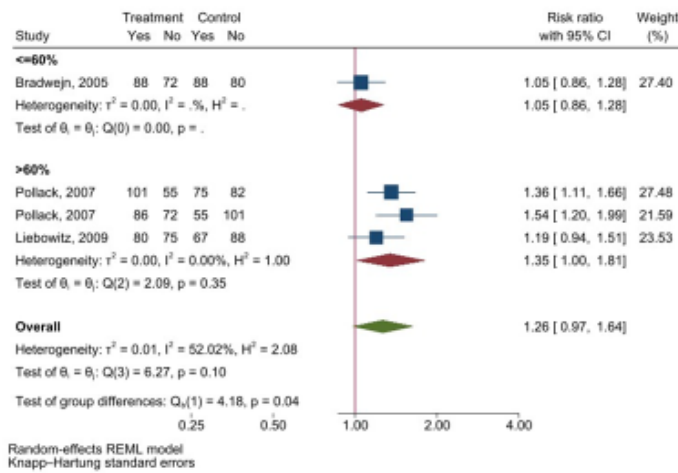

d) Venlafaxine vs placebo; Duration of panic disorder

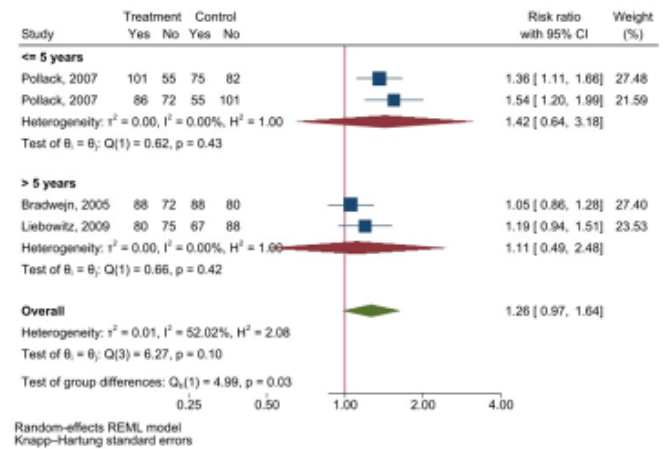

**eFigure 5. Surface under the cumulative ranking curve of disease remission**

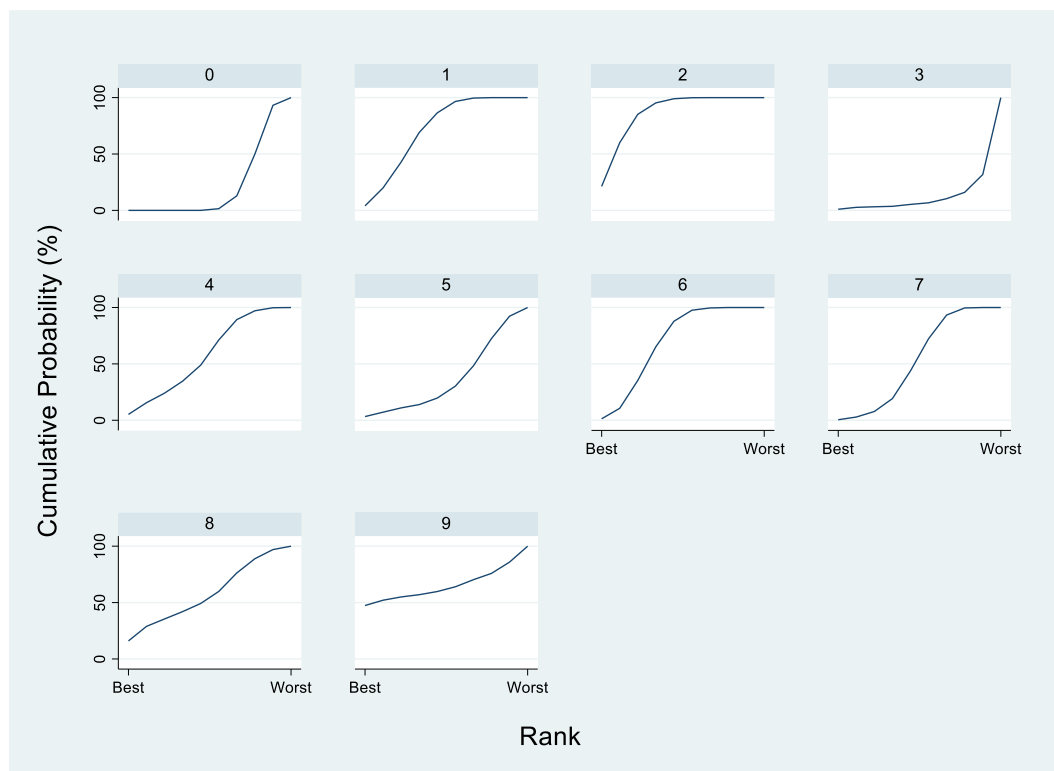

0) Placebo; 1) Tricyclic antidepressants; 2) Benzodiazepines; 3) Beta-blocker; 4) Monoamine oxidase inhibitors; 5) Buspirone; 6) Selective serotonin reuptake inhibitor; 7) Serotonin norepinephrine reuptake inhibitor; 8) Norepinephrine reuptake inhibitor; 9) Selective serotonin reuptake inhibitor plus benzodiazepine

| Treatment   | SUCRA | PrBest | MeanRank |
|-------------|-------|--------|----------|
| Placebo     | 17.5  | 0.0    | 8.4      |
| TCA         | 68.7  | 4.0    | 3.8      |
| BZD         | 84.5  | 21.3   | 2.4      |
| Betablocker | 9.0   | 1.0    | 9.2      |
| MOAI        | 54.0  | 5.2    | 5.1      |
| Buspirone   | 33.2  | 3.3    | 7.0      |
| SSRI        | 66.4  | 1.3    | 4.0      |
| SNRI        | 48.8  | 0.5    | 5.6      |
| NRI         | 54.9  | 16.0   | 5.1      |
| SSRIplusBZD | 63.0  | 47.4   | 4.3      |

**eFigure 6. Surface under the cumulative ranking curve of sensitivity analysis of disease remission according to duration of treatment**

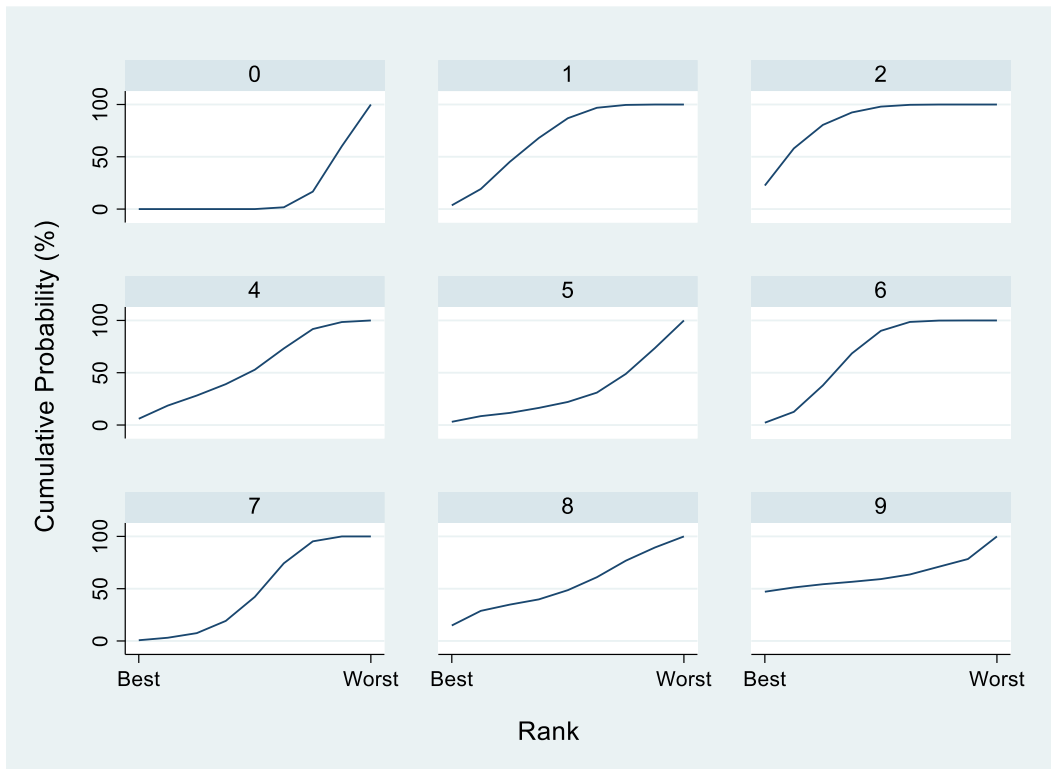

0) Placebo; 1) Tricyclic antidepressants; 2) Benzodiazepines; 4) Monoamine oxidase inhibitors; 5) Buspirone; 6) Selective serotonin reuptake inhibitor; 7) Serotonin norepinephrine reuptake inhibitor; 8) Norepinephrine reuptake inhibitor; 9) Selective serotonin reuptake inhibitor plus benzodiazepine

| Treatment   | SUCRA | PrBest | MeanRank |
|-------------|-------|--------|----------|
| Placebo     | 9.8   | 0.0    | 8.2      |
| TCA         | 64.9  | 3.6    | 3.8      |
| BZD         | 81.4  | 22.5   | 2.5      |
| MOAI        | 51.0  | 6.0    | 4.9      |
| Buspirone   | 26.9  | 3.1    | 6.8      |
| SSRI        | 63.7  | 2.2    | 3.9      |
| SNRI        | 42.8  | 0.7    | 5.6      |
| NRI         | 49.3  | 14.8   | 5.1      |
| SSRIplusBZD | 60.2  | 47.1   | 4.2      |



eFigure 7. Comparison-adjusted funnel plot of disease remission

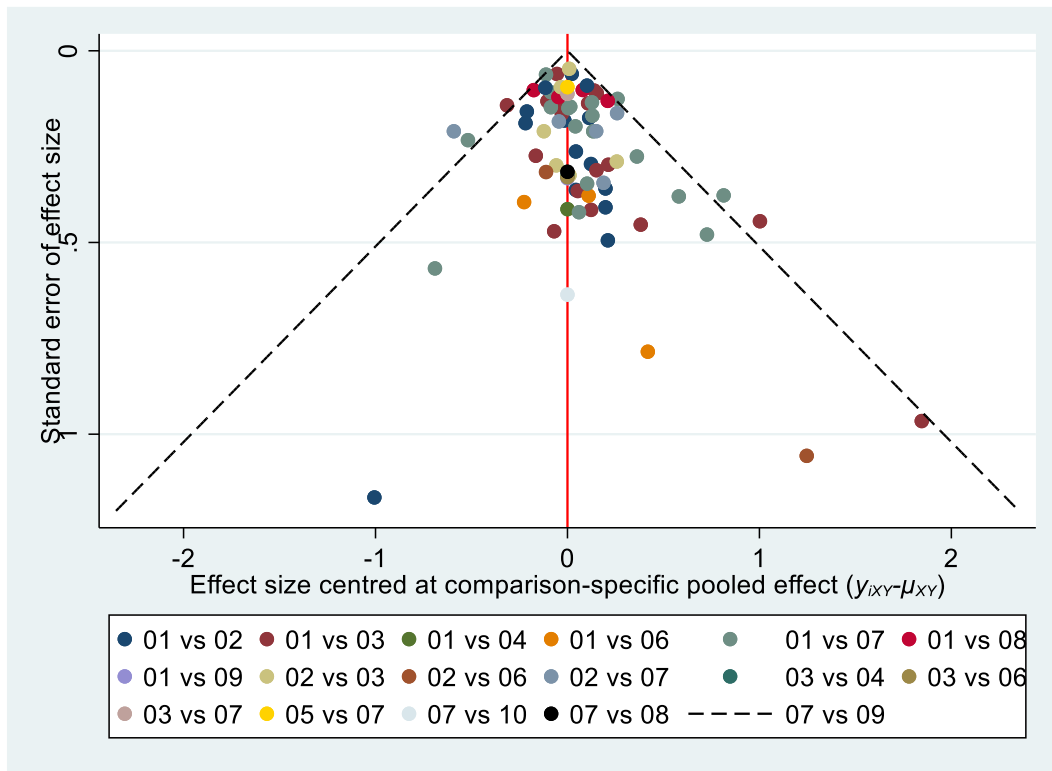

# eFigure 8. Estimation of pooled risk ratio of dropout rate between treatment comparisons: Direct meta-analysis

a) TCA vs placebo

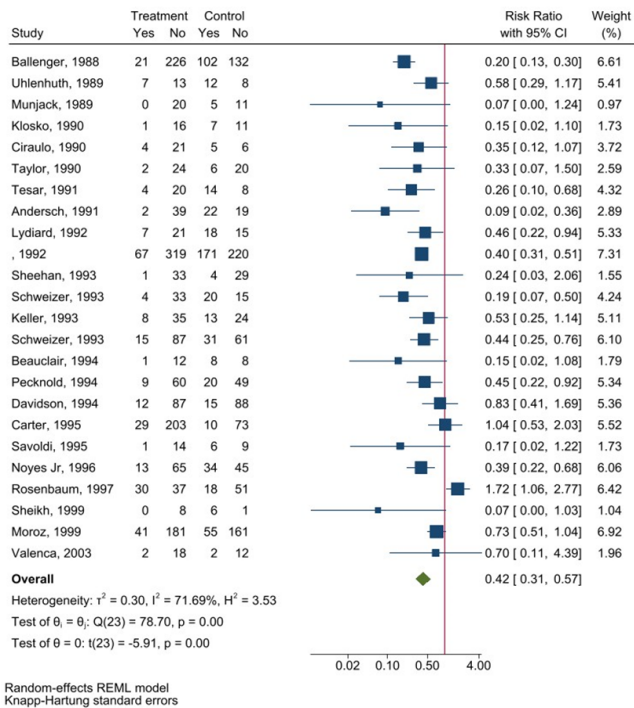

b) BZD vs placebo

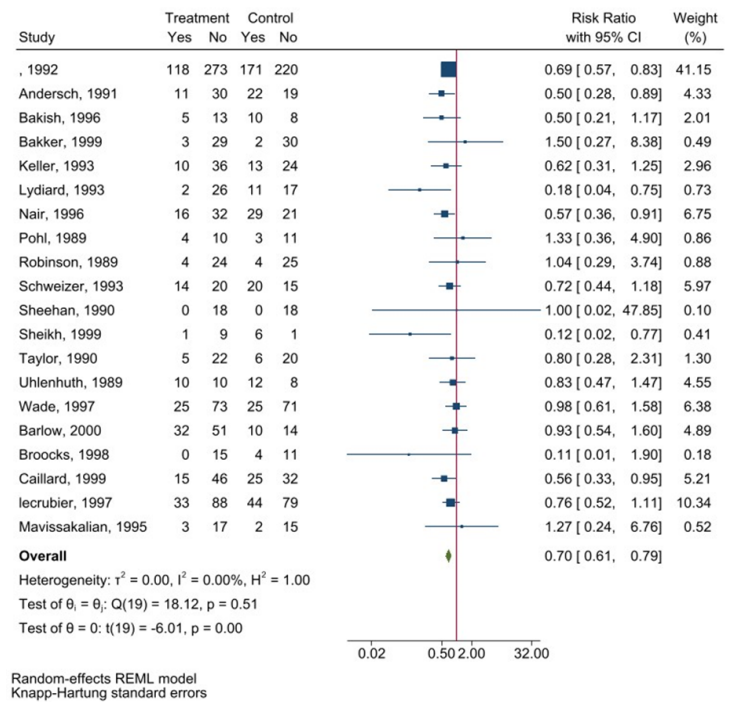

c) Buspirone vs placebo

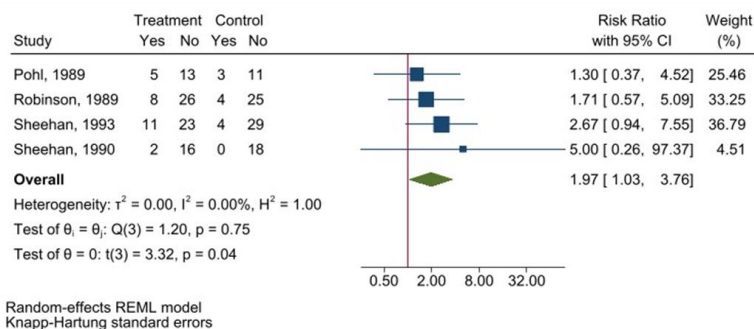

d) Venlafaxine vs placebo

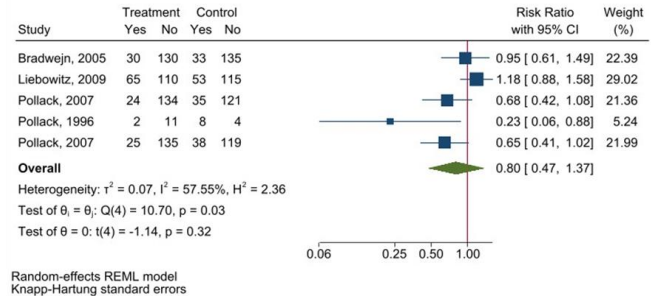

**eFigure 8 (continued)**

**e) Fluvoxamine vs placebo**

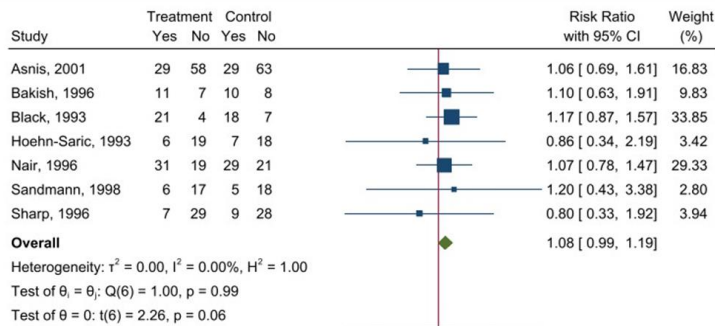

Random-effects REML model  
Knapp-Hartung standard errors

**f) Paroxetine vs placebo**

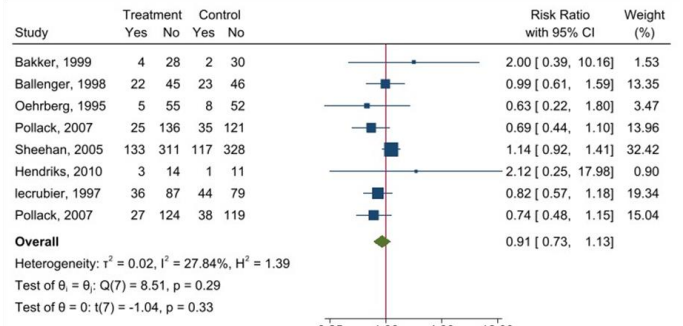

Random-effects REML model  
Knapp-Hartung standard errors

**g) Sertraline vs placebo**

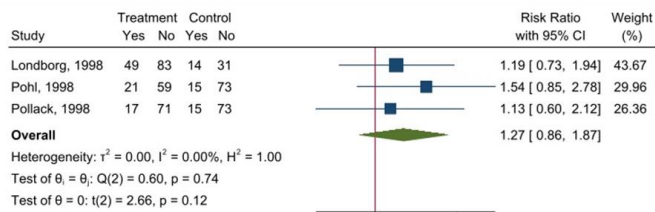

Random-effects REML model  
Knapp-Hartung standard errors

**h) TCA vs BZD**

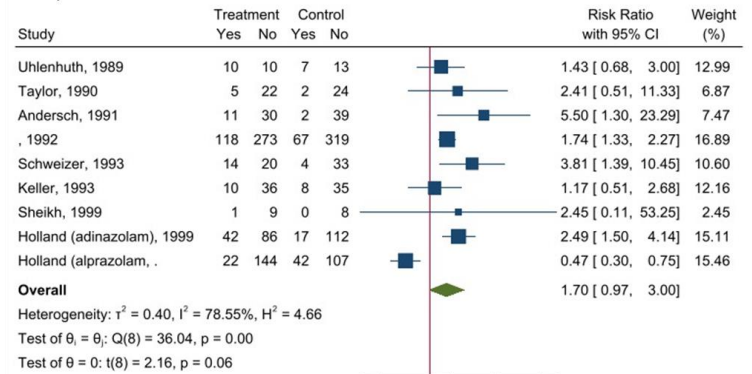

Random-effects REML model  
Knapp-Hartung standard errors

**i) TCA vs buspirone**

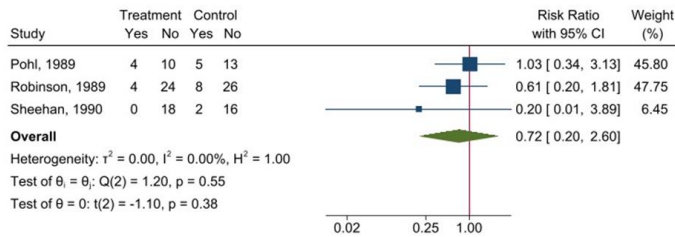

Random-effects REML model  
Knapp-Hartung standard errors

BZD; benzodiazepine, TCA; tricyclic antidepressants

**eFigure 9. Subgroup analysis of tricyclic antidepressants and benzodiazepines on dropout rate by percent female, mean age, percent agoraphobia, and duration of treatment**

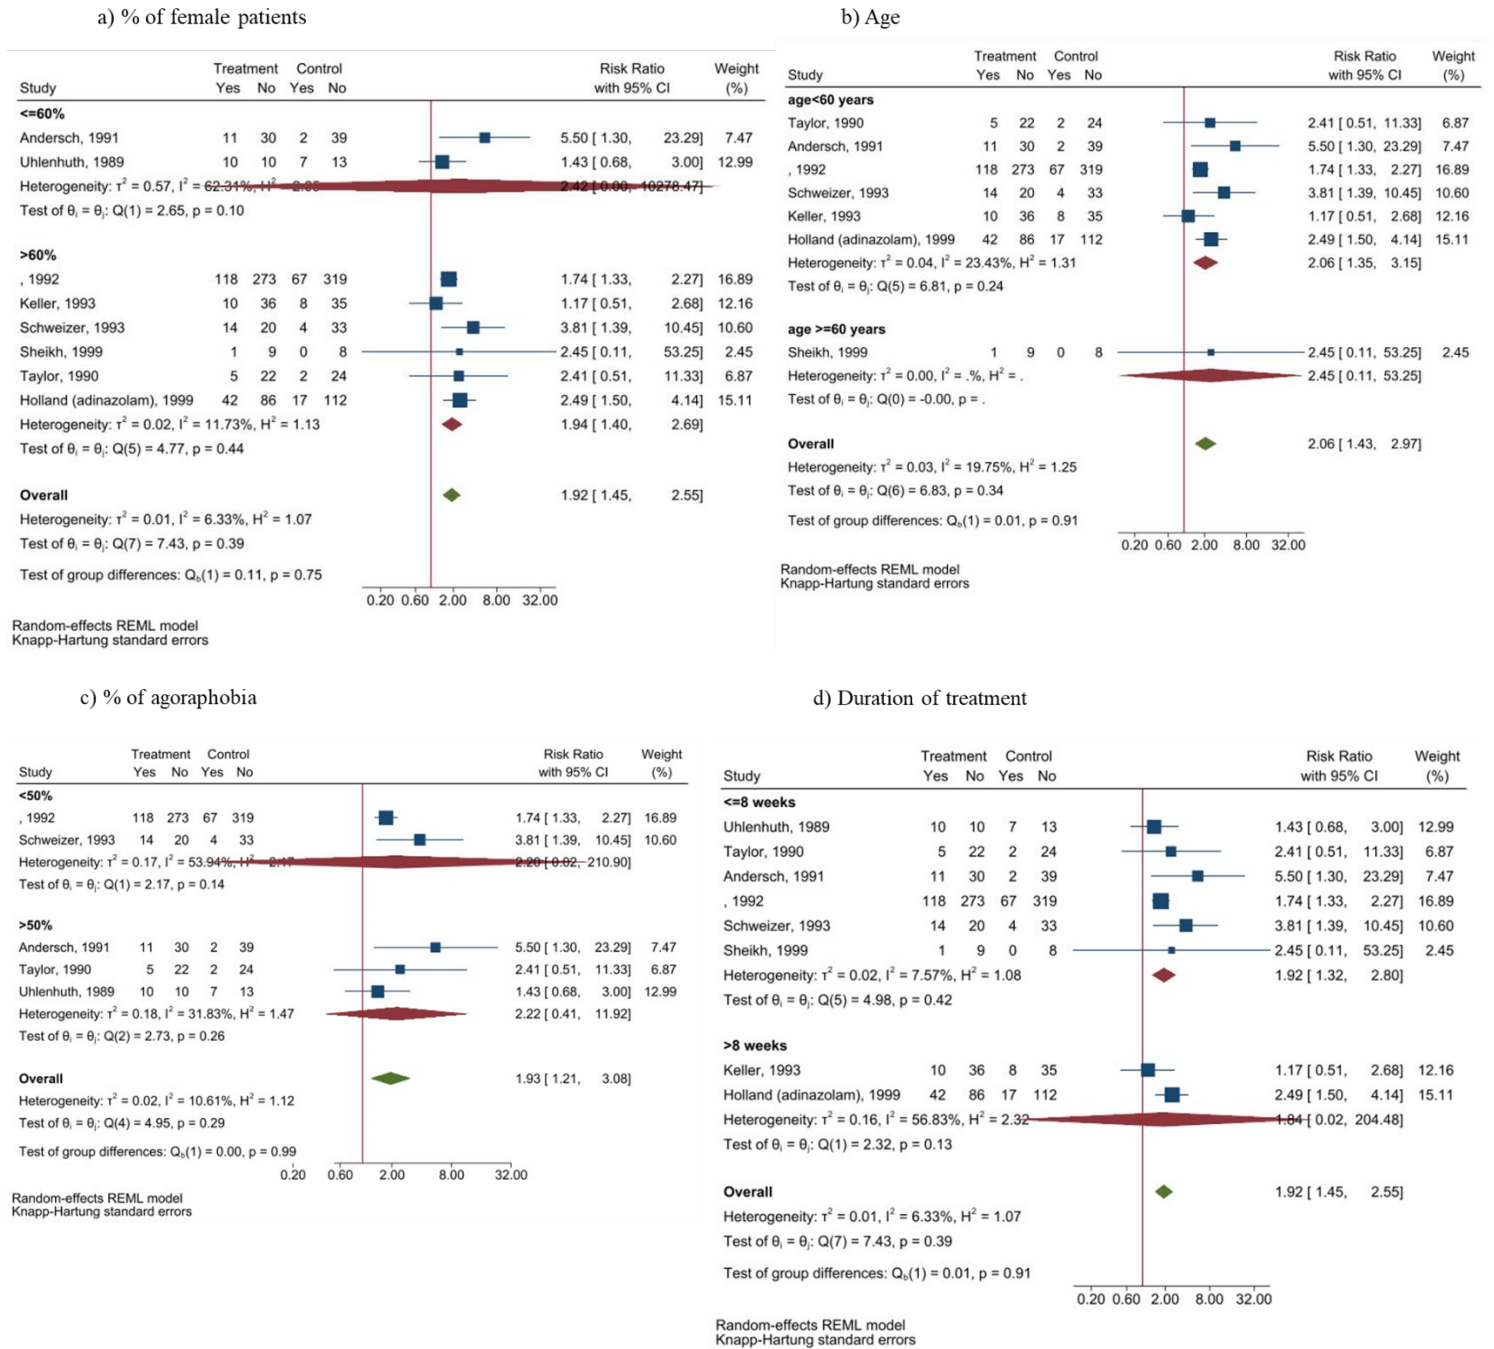

**eFigure 10. Surface under the cumulative ranking curve of dropout rate**

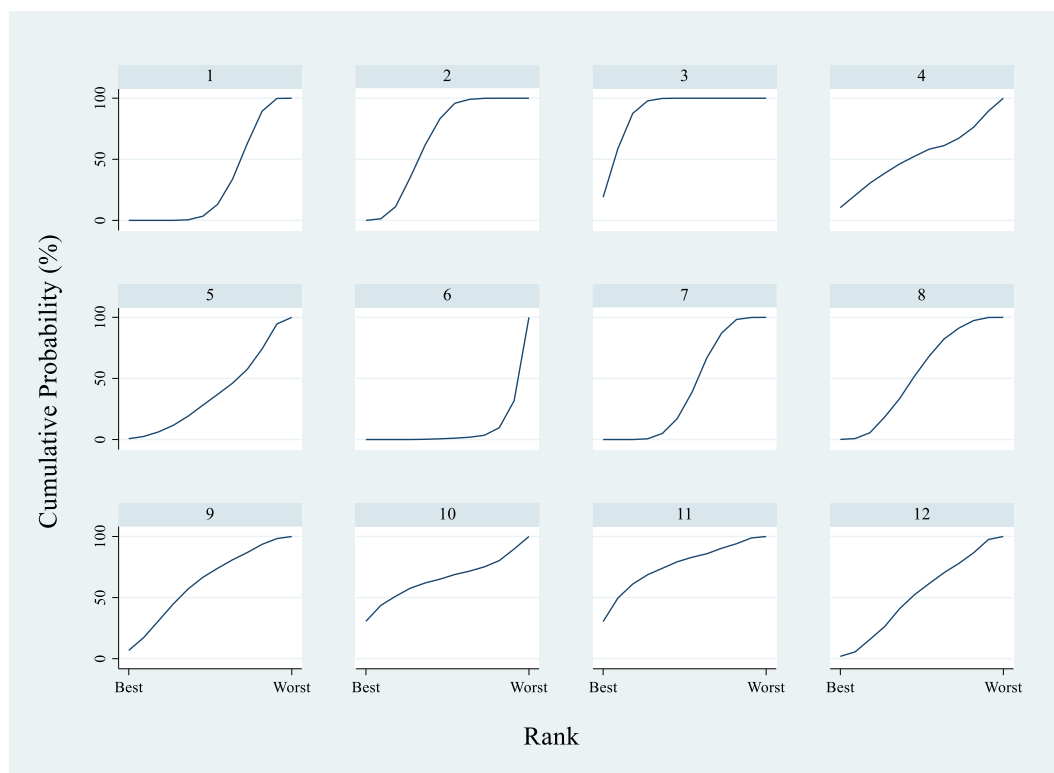

1) Placebo; 2) Tricyclic ant-depressants; 3) Benzodiazepines; 4) Beta-blocker; 5) Monoamine oxidase inhibitors; 6) Buspirone; 7) Selective serotonin reuptake inhibitors; 8) Serotonin norepinephrine reuptake inhibitor; 9) Norepinephrine reuptake inhibitor; 10) Noradrenergic and specific serotonergic antidepressants; 11) Tricyclic antidepressant plus benzodiazepine; 12) Selective serotonin reuptake inhibitor plus benzodiazepine

| Treatment   | SUCRA | PrBest | MeanRank |
|-------------|-------|--------|----------|
| Placebo     | 27.5  | 0.0    | 9.0      |
| TCA         | 62.5  | 0.0    | 5.1      |
| BZD         | 87.5  | 19.0   | 2.4      |
| Betablocker | 50.1  | 10.5   | 6.5      |
| MOAI        | 34.3  | 0.7    | 8.2      |
| Buspirone   | 4.4   | 0.0    | 11.5     |
| SSRI        | 37.6  | 0.0    | 7.9      |
| SNRI        | 49.9  | 0.1    | 6.5      |
| NRI         | 59.7  | 6.8    | 5.4      |
| NaSSA       | 63.3  | 30.6   | 5.0      |
| TCAplusBZD  | 74.1  | 30.4   | 3.8      |
| SSRIplusBZD | 48.8  | 1.9    | 6.6      |

**eFigure 11. Surface under the cumulative ranking curve of sensitivity analysis of dropout rate**

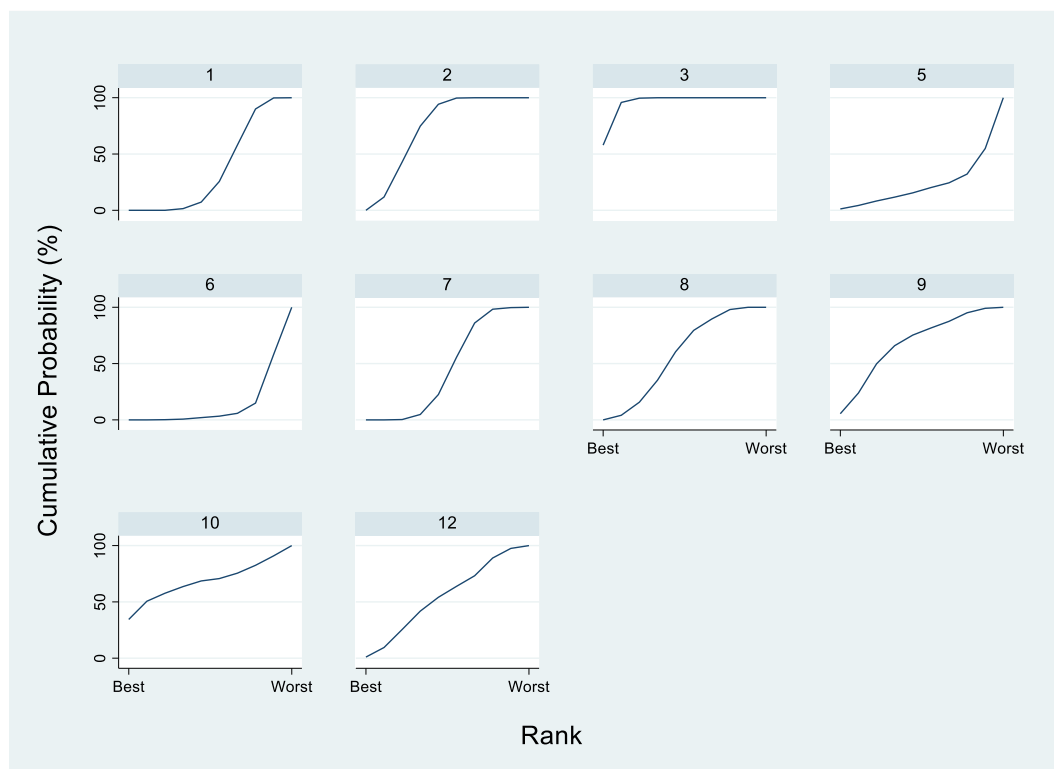

1) Placebo; 2) Tricyclic ant-depressants; 3) Benzodiazepines; 5) Monoamine oxidase inhibitors; 6) Buspirone; 7) Selective serotonin reuptake inhibitors; 8) Serotonin norepinephrine reuptake inhibitor; 9) Norepinephrine reuptake inhibitor; 10) Noradrenergic and specific serotonergic antidepressants; 11) Tricyclic antidepressant plus benzodiazepine; 12) Selective serotonin reuptake inhibitor plus benzodiazepine

| Treatment  | SUCRA | PrBest | MeanRank |
|------------|-------|--------|----------|
| Placebo    | 31.4  | 0.0    | 7.2      |
| TCA        | 69.3  | 0.0    | 3.8      |
| BZD        | 94.8  | 57.9   | 1.5      |
| MOAI       | 19.2  | 1.2    | 8.3      |
| Buspirone  | 9.4   | 0.0    | 9.1      |
| SSRI       | 40.8  | 0.0    | 6.3      |
| SNRI       | 53.6  | 0.0    | 5.2      |
| NRI        | 64.9  | 5.5    | 4.2      |
| NaSSA      | 66.1  | 34.4   | 4.1      |
| TCAplusBZD | 50.6  | 1.0    | 5.4      |

eFigure 12. Comparison-adjusted funnel plot of dropout rate

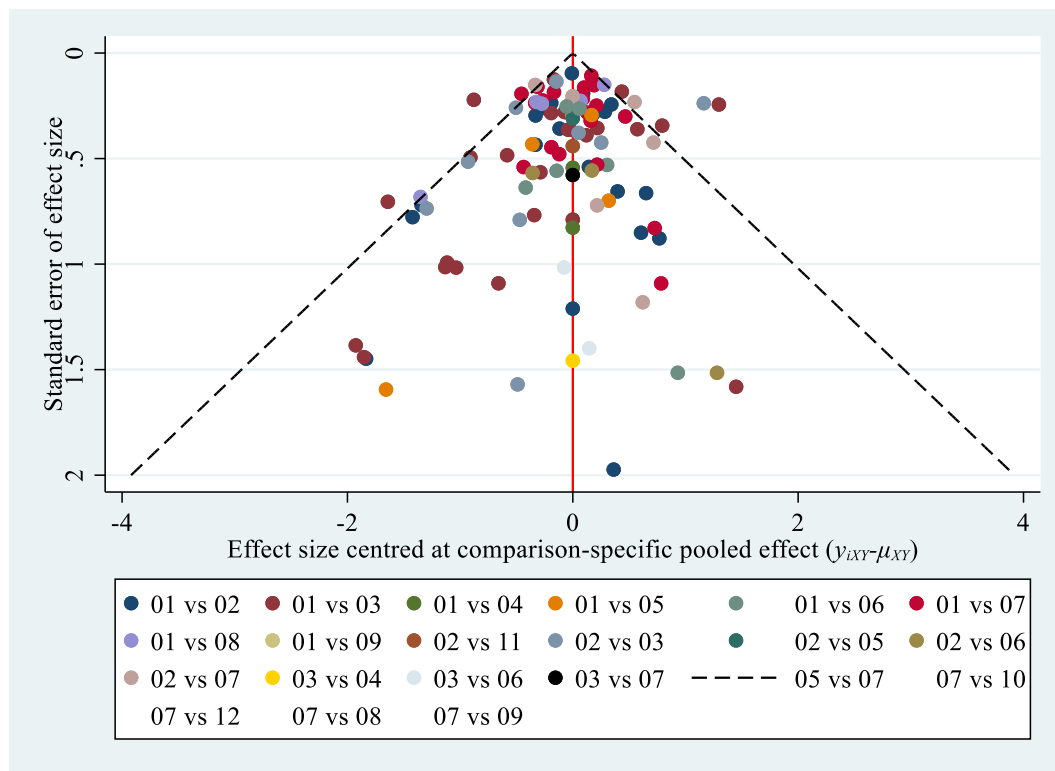

**eFigure 13. Estimation of pooled mean difference of anxiety score between intervention and placebo: Direct meta-analysis**

**a) BZD vs placebo**

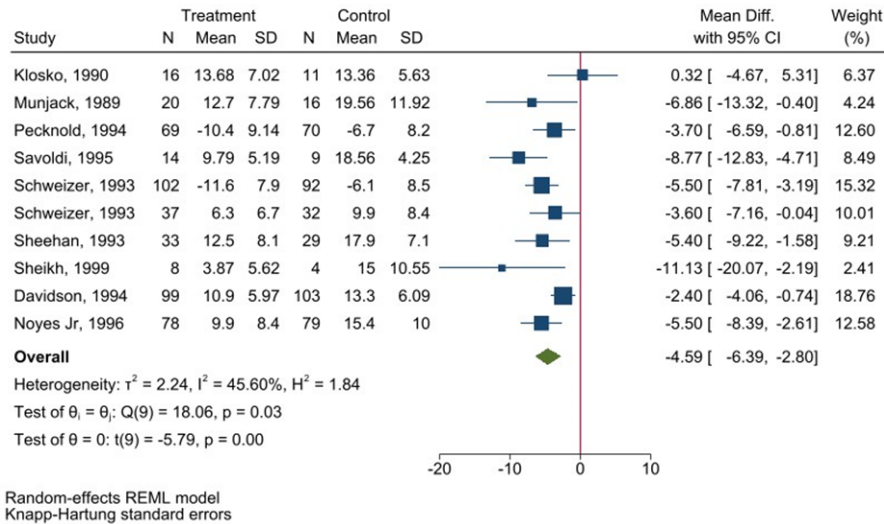

**b) TCA vs placebo**

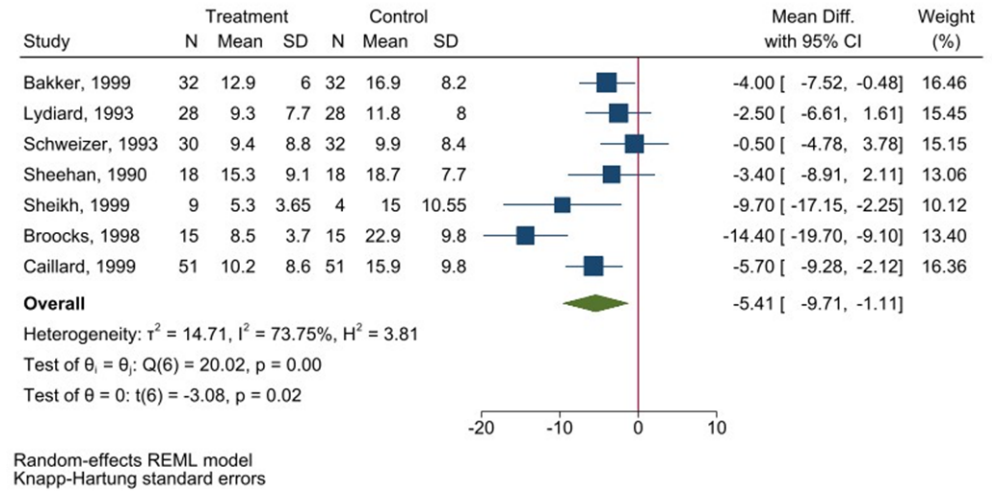

**c) Fluvoxamine vs placebo**

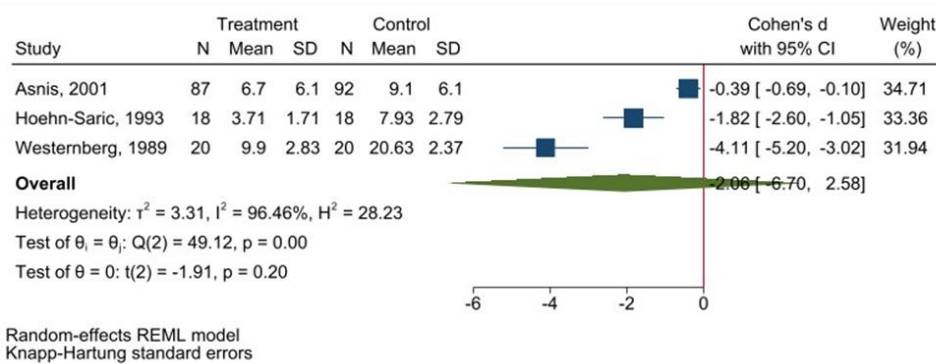

**d) Paroxetine vs placebo**

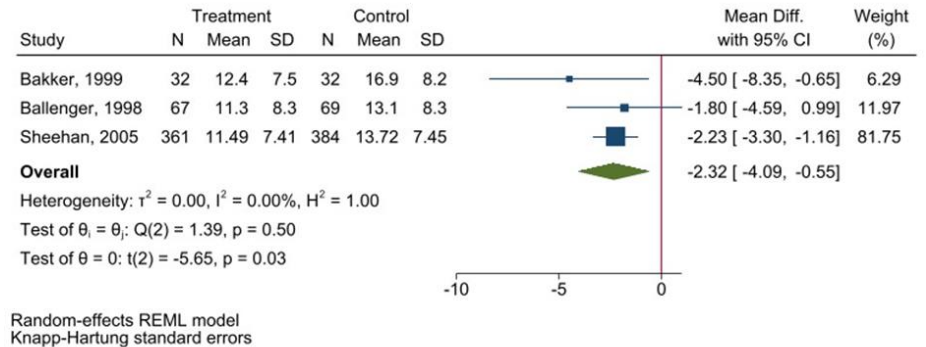

BZD; benzodiazepine, TCA; tricyclic antidepressant



**eFigure 14. Subgroup analysis of mean difference of anxiety score between benzodiazepines and placebo**

a) Duration of panic disorder

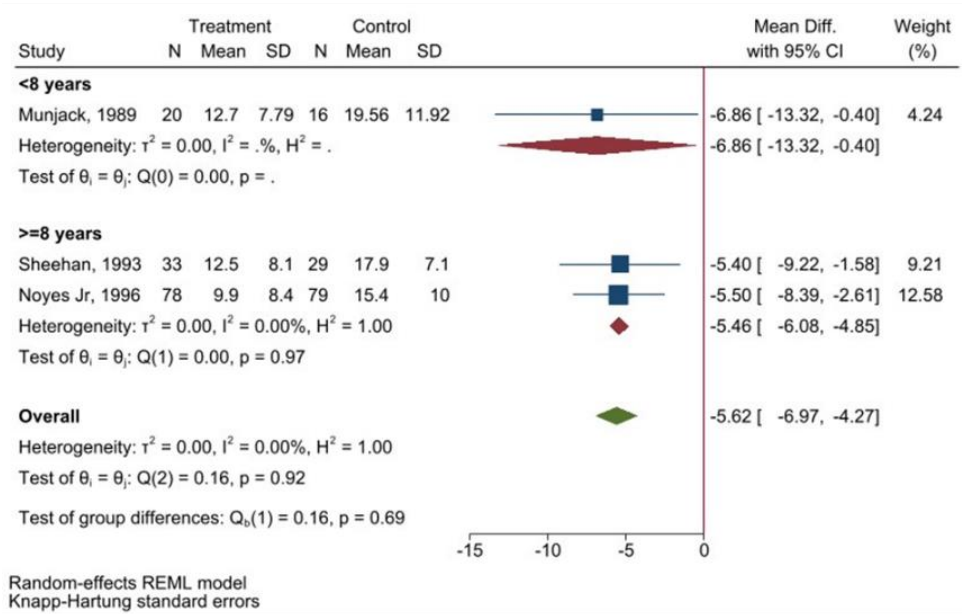

b) % of agoraphobia

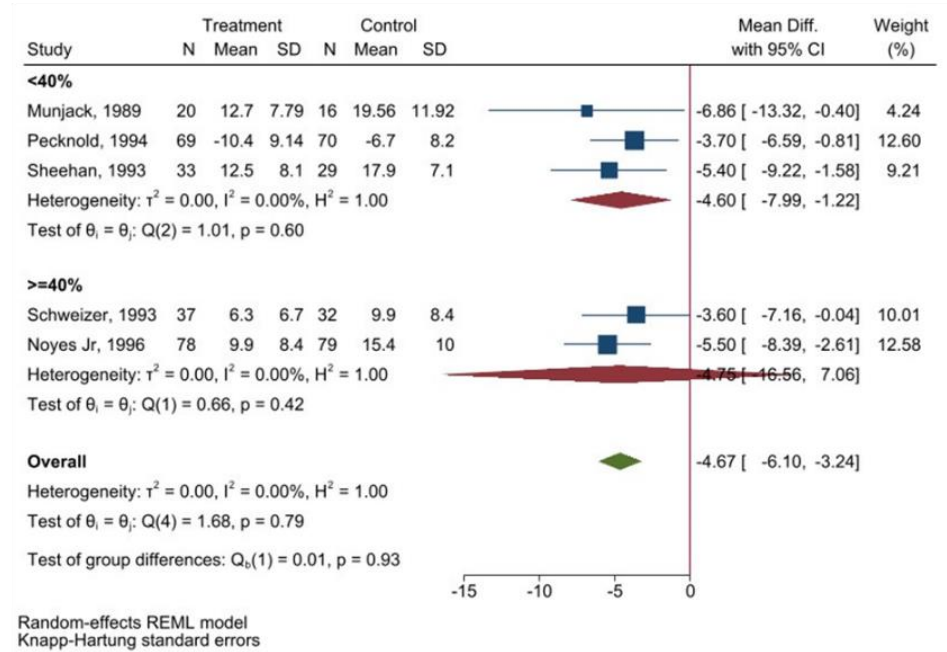

**eFigure 15. Surface under the cumulative ranking curve of anxiety score**

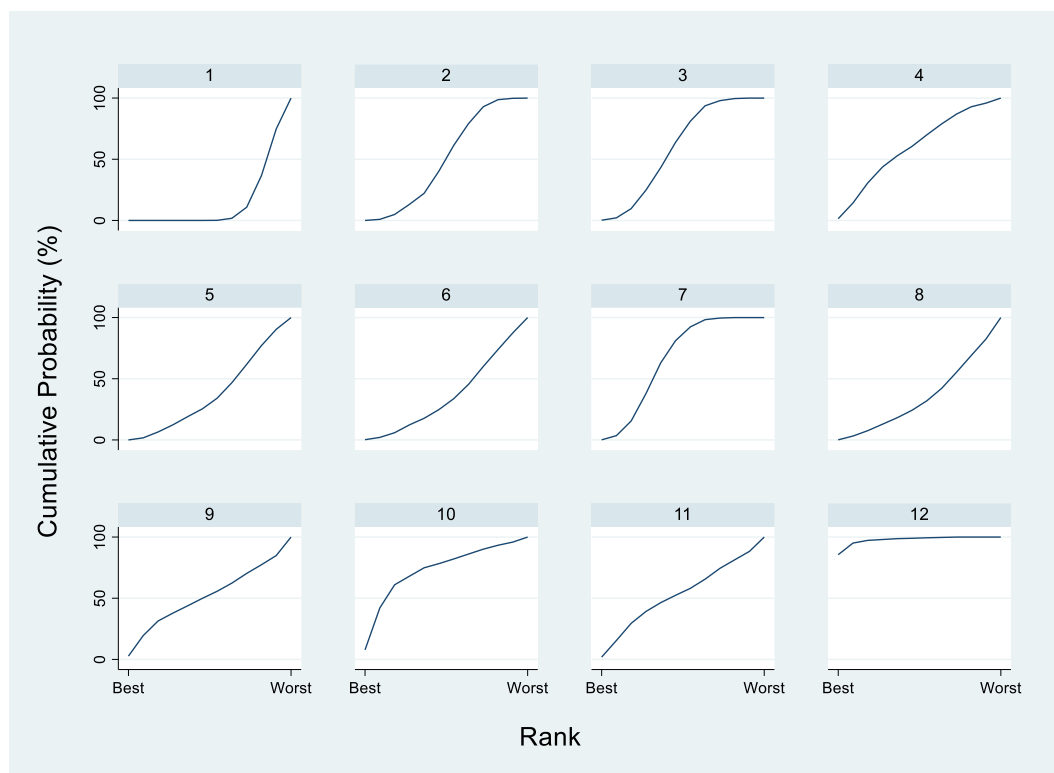

1) Placebo; 2) Tricyclic ant-depressants; 3) Benzodiazepines;4) Beta-blockers; 5) Monoamine oxidase inhibitors; 6) Buspirone; 7) Selective serotonin reuptake inhibitors; 8) Serotonin norepinephrine reuptake inhibitors; 9) Norepinephrine reuptake inhibitor; 10) Tricyclic antidepressants plus benzodiazepines;11) Selective serotonin reuptake inhibitor plus benzodiazepines; 12) Selective serotonin reuptake inhibitors plus beta-blockers

| Treatment           | SUCRA | PrBest | MeanRank |
|---------------------|-------|--------|----------|
| Placebo             | 11.3  | 0.0    | 10.8     |
| TCA                 | 46.7  | 0.0    | 6.9      |
| BZD                 | 56.0  | 0.2    | 5.8      |
| Betablocker         | 57.1  | 1.4    | 5.7      |
| MAOI                | 34.1  | 0.0    | 8.2      |
| Buspirone           | 33.0  | 0.2    | 8.4      |
| SSRI                | 62.9  | 0.1    | 5.1      |
| SNRI                | 31.6  | 0.1    | 8.5      |
| NRI                 | 48.7  | 2.7    | 6.6      |
| TCAplusBZD          | 70.9  | 7.8    | 4.2      |
| SSRIplusBZD         | 50.2  | 1.9    | 6.5      |
| SSRIplusBetablocker | 97.5  | 85.6   | 1.3      |

eFigure 16. Comparison-adjusted and contour enhanced funnel plots of anxiety score

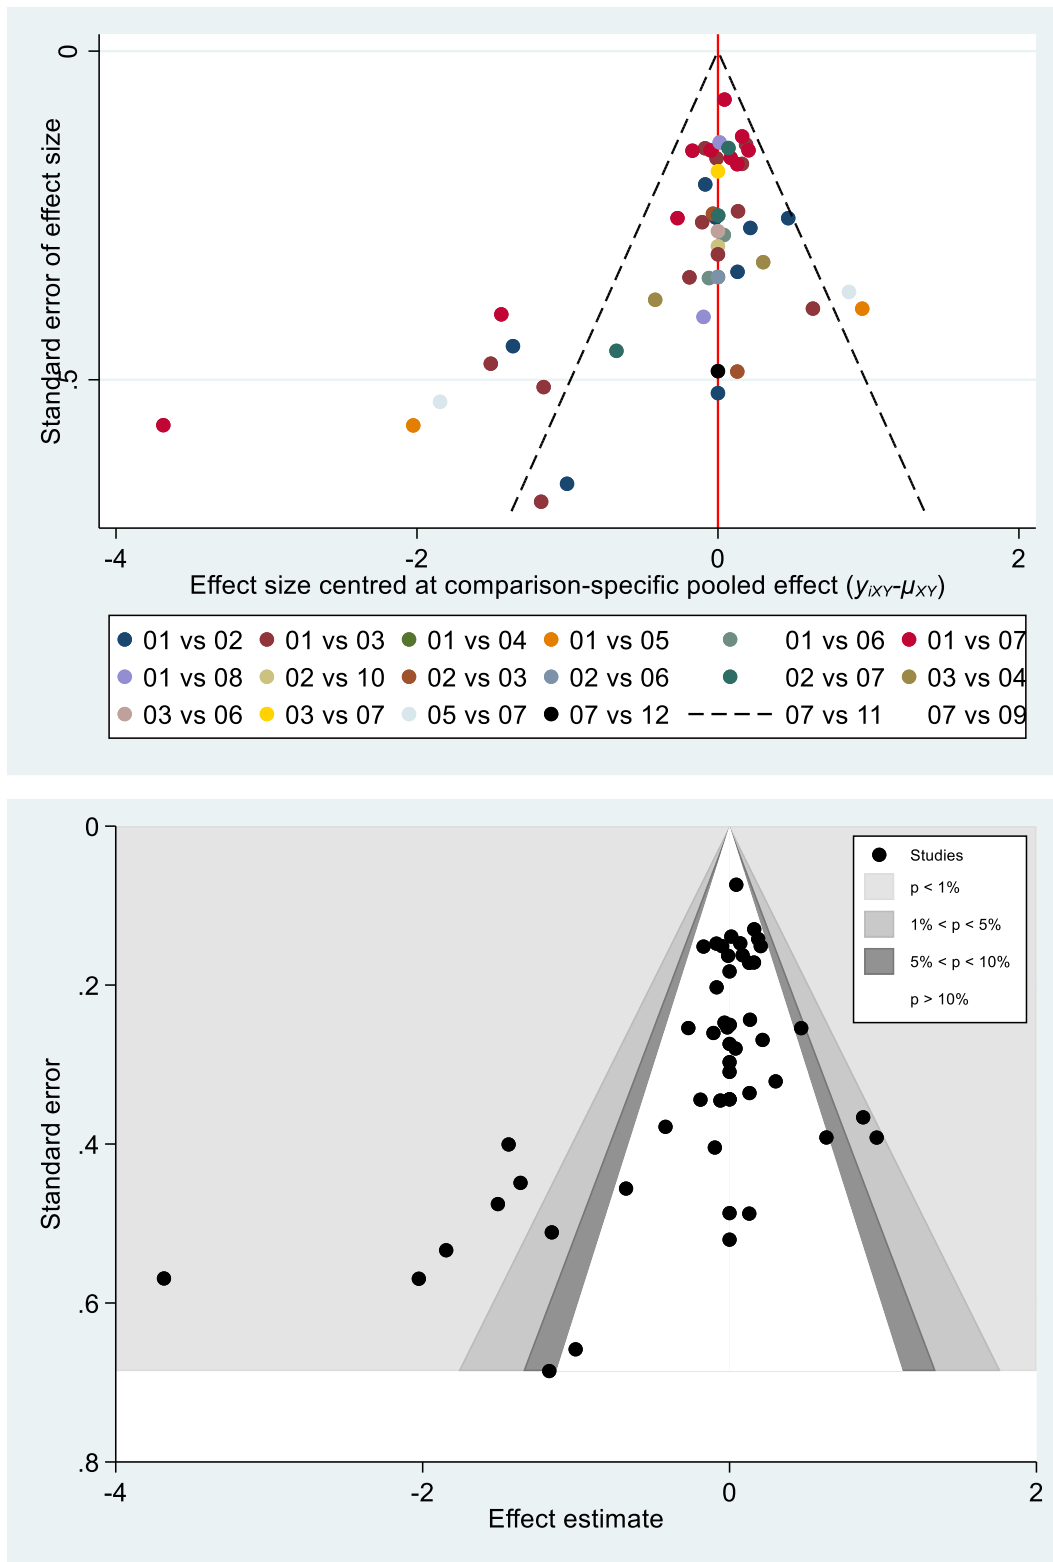

**eFigure 17. Estimation of pooled mean difference of depression score between intervention and placebo: Direct meta-analysis**

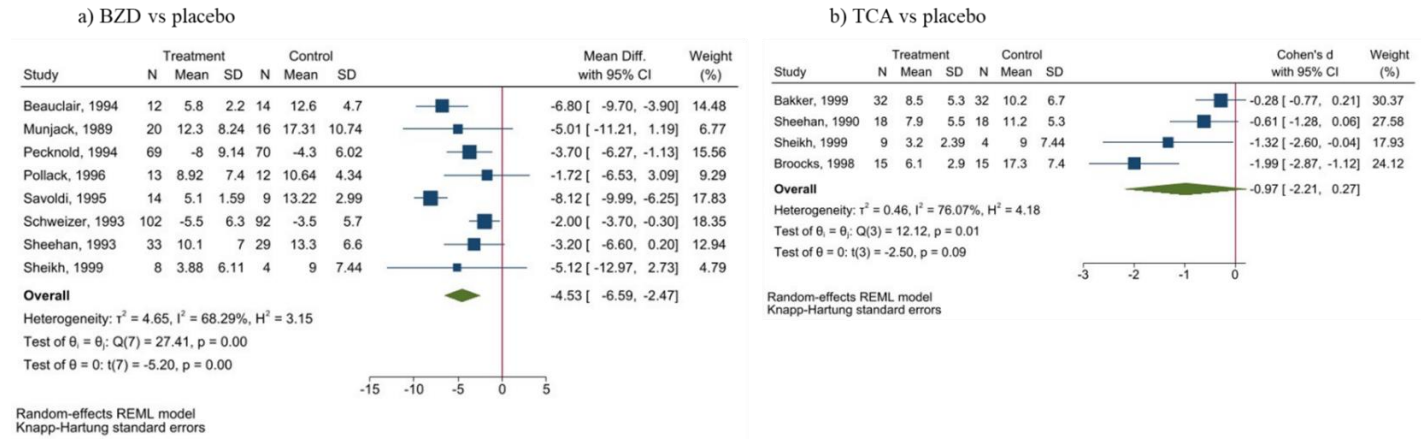

BZD; benzodiazepine, TCA; tricyclic antidepressants

**eFigure 18. Subgroup analysis of mean difference of depression score between benzodiazepines and placebo**

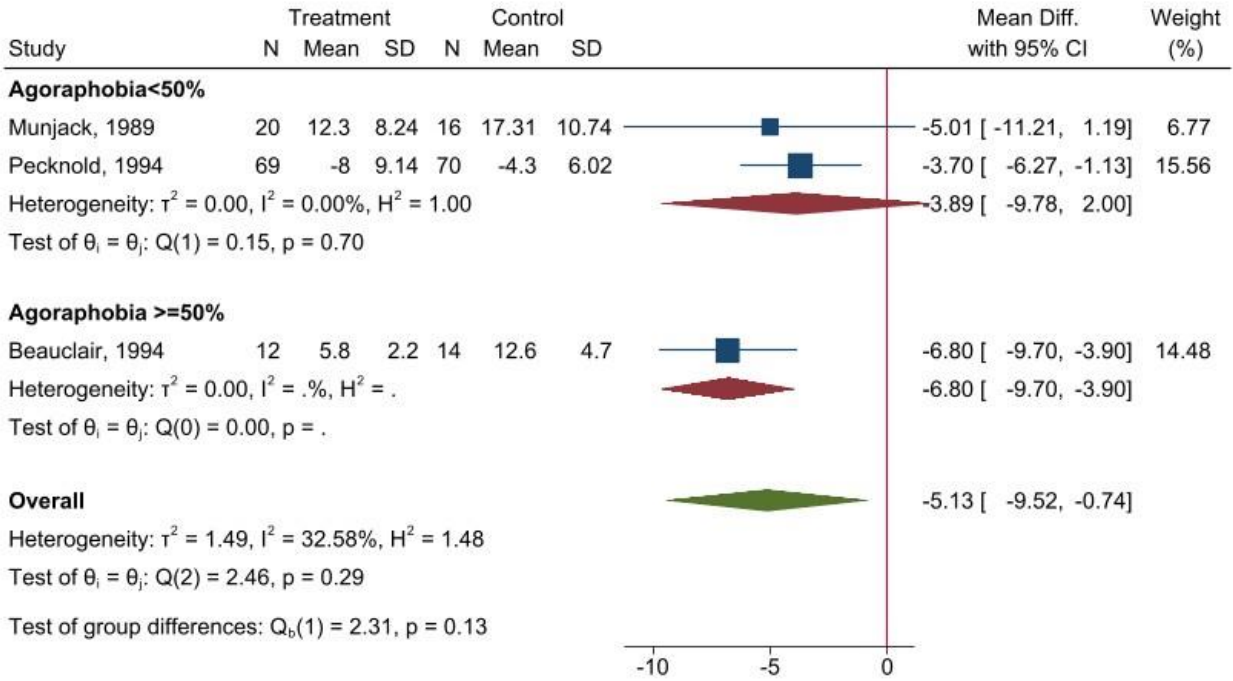

Random-effects REML model  
Knapp-Hartung standard errors

**eFigure 19. Surface under the cumulative ranking curve of depression score**

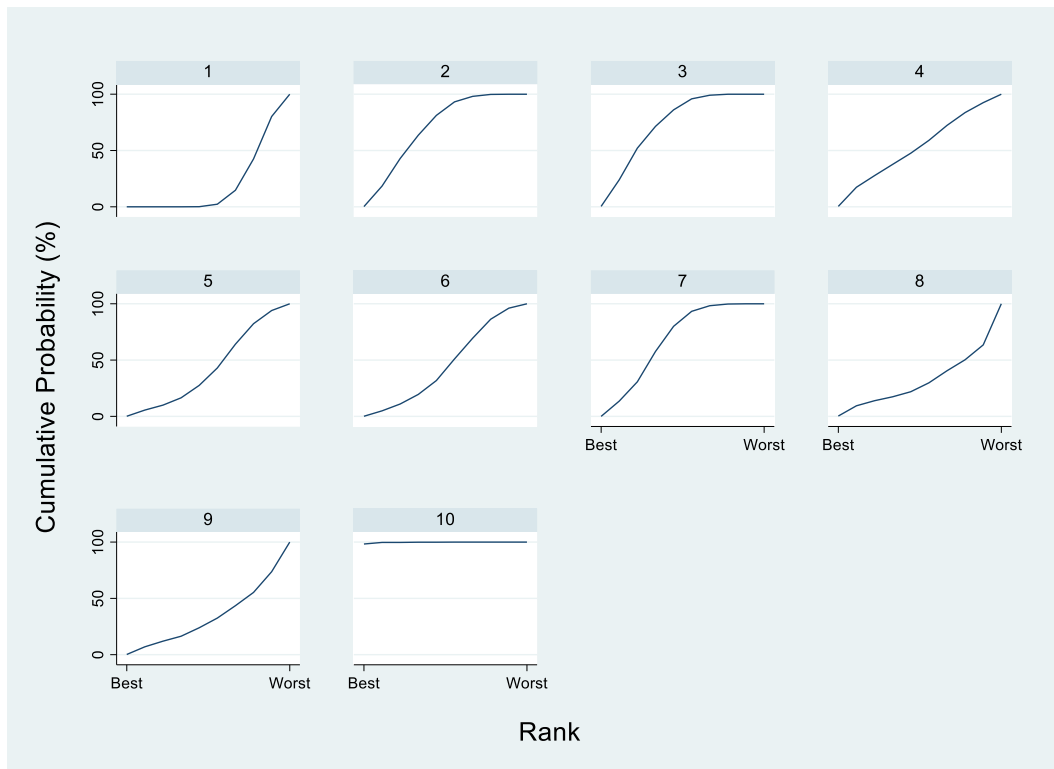

1) Placebo; 2) Tricyclic ant-depressants; 3) Benzodiazepines; 4) Beta-blockers; 5) Monoamine oxidase inhibitors; 6) Buspirone; 7) Selective serotonin reuptake inhibitor; 8) Norepinephrine reuptake inhibitor; 9) Selective serotonin reuptake inhibitor plus benzodiazepine; 10) Selective serotonin reuptake inhibitor plus beta-blockers

| Treatment           | SUCRA | PrBest | MeanRank |
|---------------------|-------|--------|----------|
| Placebo             | 15.5  | 0.0    | 8.6      |
| TCA                 | 66.4  | 0.2    | 4.0      |
| BZD                 | 69.9  | 0.4    | 3.7      |
| Betablocker         | 48.7  | 0.4    | 5.6      |
| MAOI                | 38.1  | 0.1    | 6.6      |
| Buspirone           | 41.1  | 0.1    | 6.3      |
| SSRI                | 63.7  | 0.0    | 4.3      |
| NRI                 | 27.4  | 0.3    | 7.5      |
| SSRIplusBZD         | 29.4  | 0.2    | 7.4      |
| SSRIplusBetablocker | 99.7  | 98.3   | 1.0      |

eFigure 20. Comparison-adjusted funnel plot of depression score

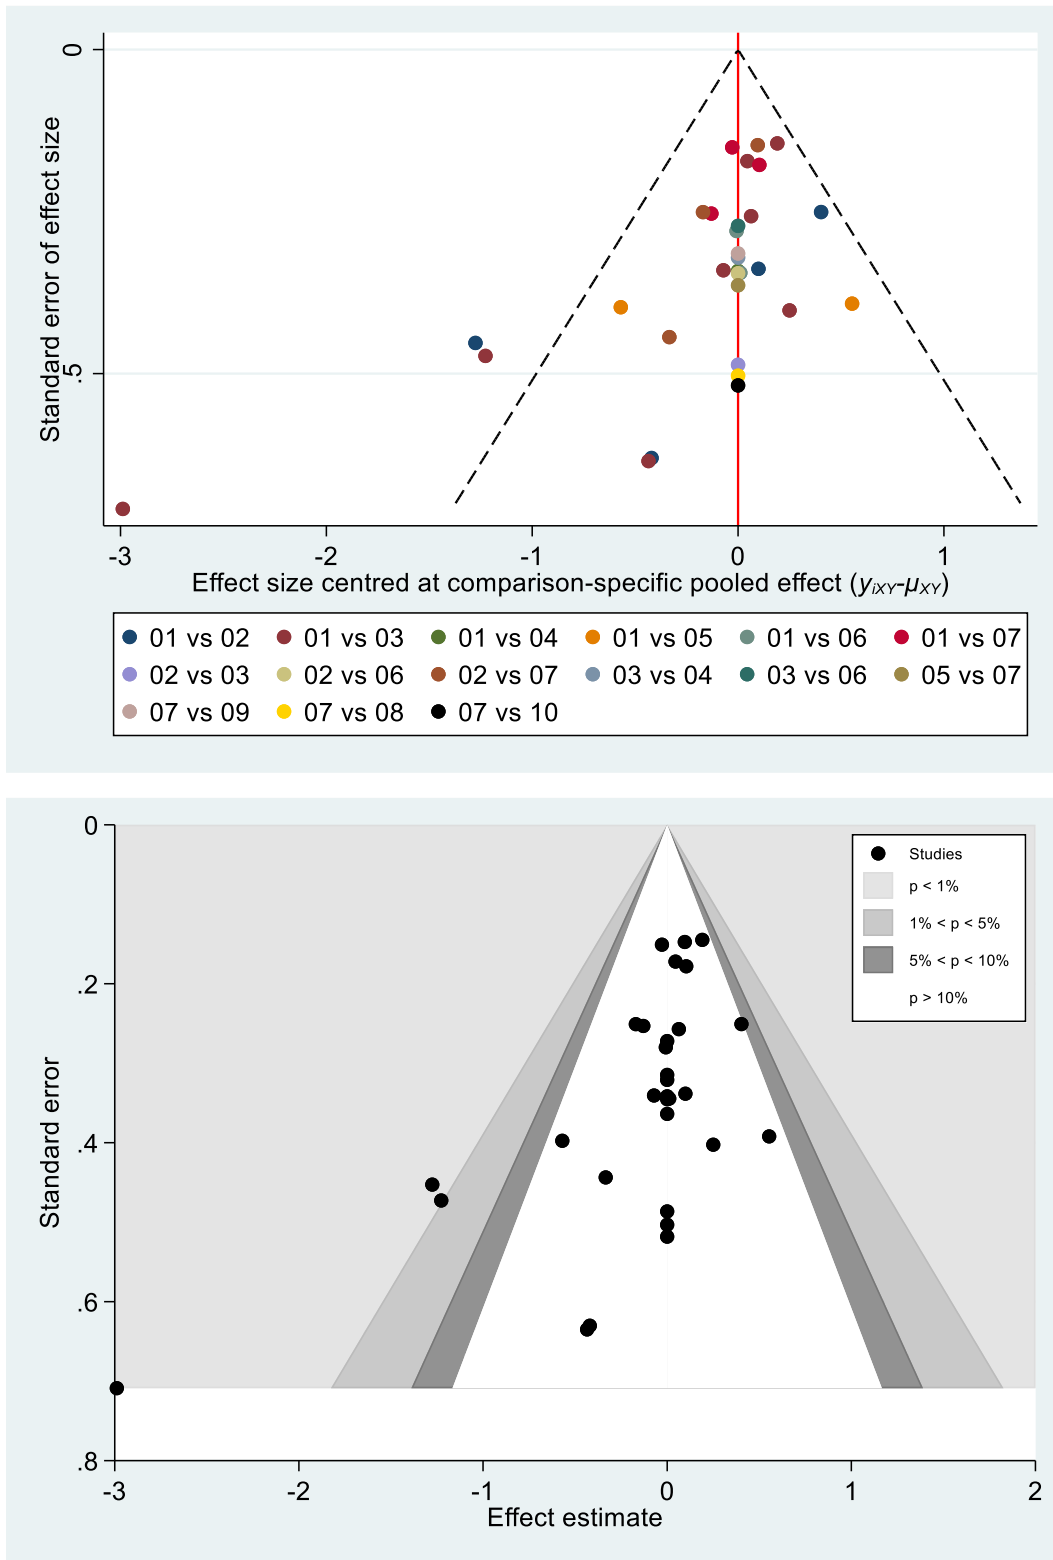

**eFigure 21. Estimation of pooled risk ratio of adverse events between treatment comparisons: Direct meta-analysis**

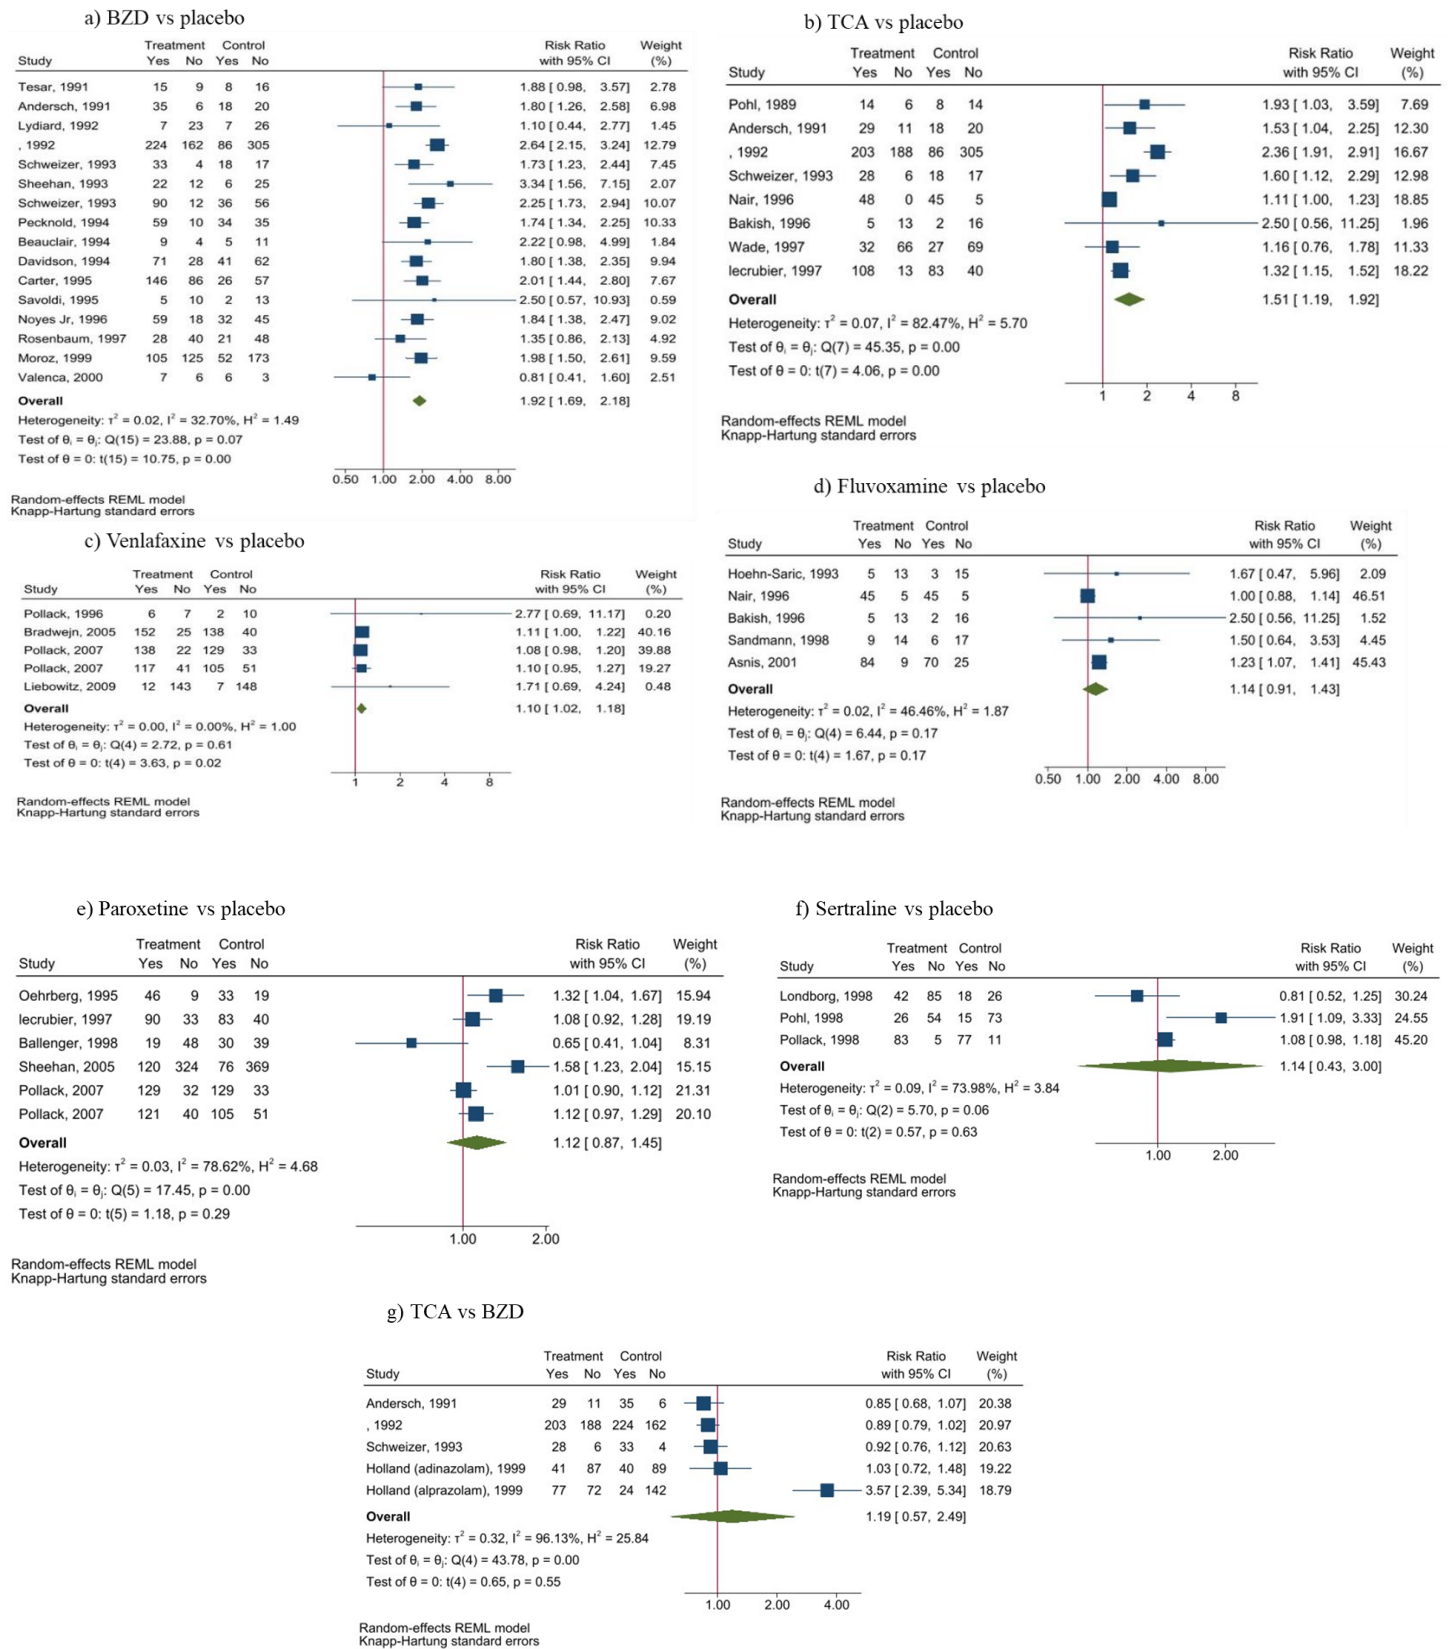

BZD; benzodiazepine, TCA; tricyclic antidepressants



**eFigure 22. Inconsistency factors of adverse events**

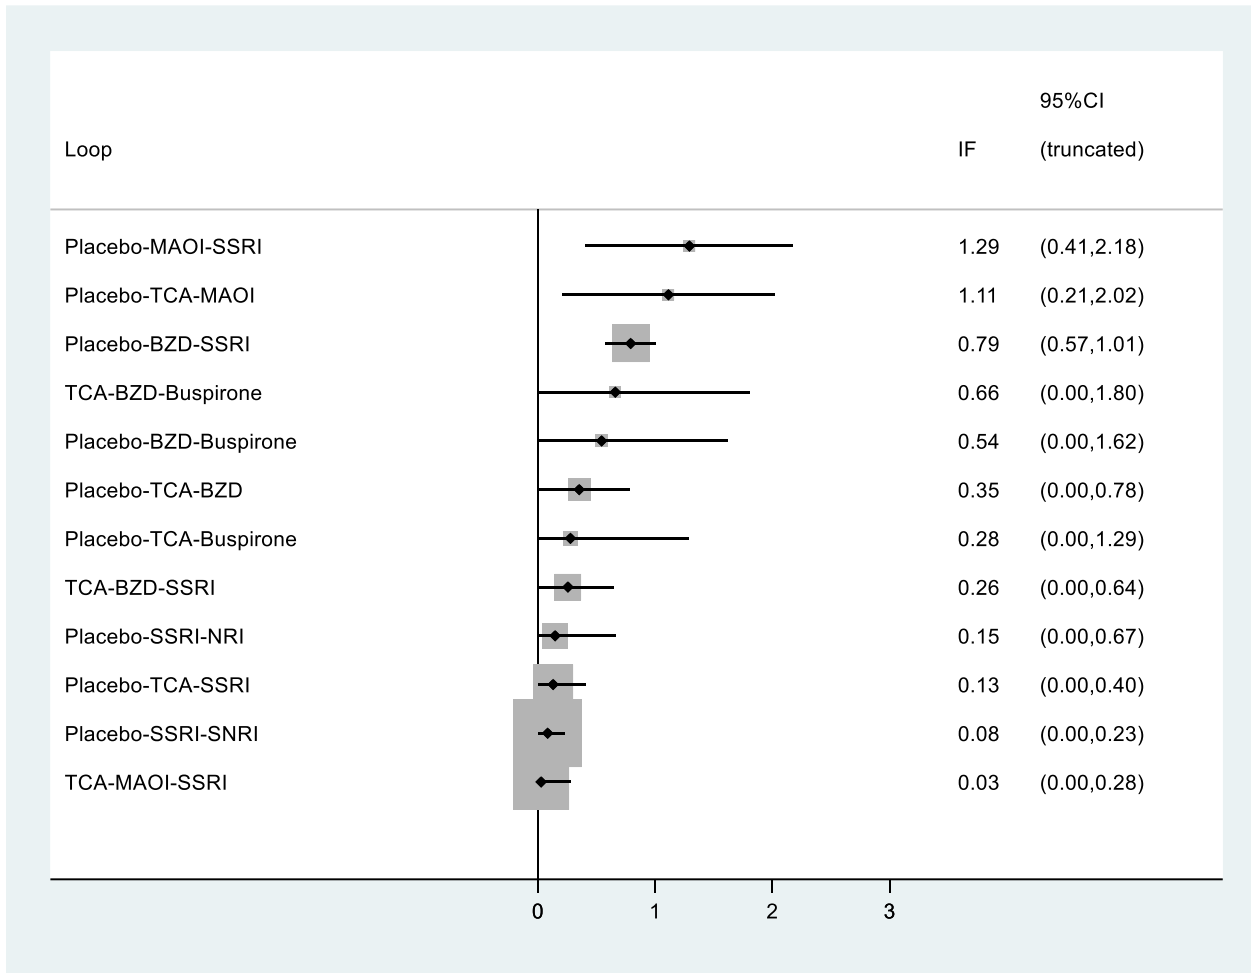

IF, inconsistency factor is a ratio of  $\ln[\text{RR}(\text{direct})/\text{RR}(\text{indirect})]$ . BZDs, benzodiazepine; MAOIs, monoamine oxidase inhibitors; NRI, norepinephrine reuptake inhibitor; SSRI, selective serotonin reuptake inhibitor; SNRI, serotonin norepinephrine reuptake inhibitor; TCAs, tricyclic antidepressants

**eFigure 23. Surface under the cumulative ranking curve of adverse events**

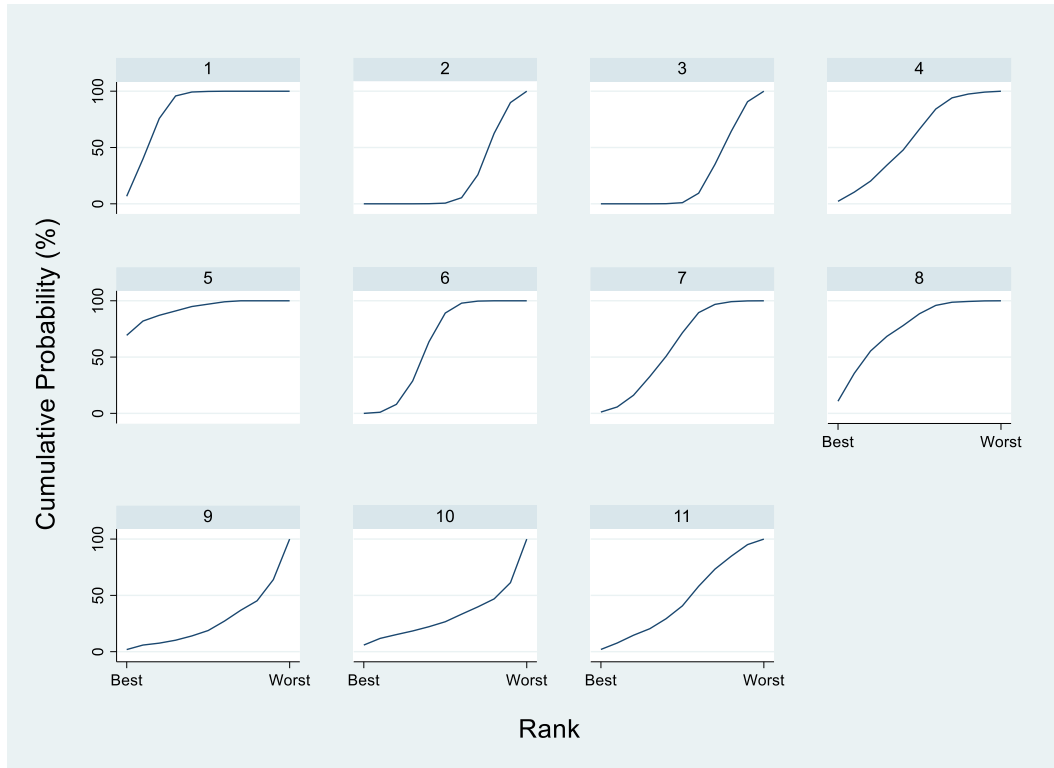

1) Placebo; 2) Tricyclic antidepressants; 3) Benzodiazepines; 4) Monoamine oxidase inhibitors; 5) Buspirone; 6) Selective serotonin reuptake inhibitor; 7) Selective serotonin reuptake inhibitor plus benzodiazepine; 8) Norepinephrine reuptake inhibitor; 9) noradrenergic and specific serotonergic antidepressants ;10) Tricyclic antidepressants plus benzodiazepine; 11) Selective serotonin reuptake inhibitor plus beta-blockers

| Treatment   | SUCRA | PrBest | MeanRank |
|-------------|-------|--------|----------|
| Placebo     | 81.7  | 6.7    | 2.8      |
| TCA         | 18.4  | 0.0    | 9.2      |
| BZD         | 20.1  | 0.0    | 9.0      |
| MAOI        | 55.6  | 2.2    | 5.4      |
| Buspirone   | 92.0  | 69.3   | 1.8      |
| SSRI        | 58.8  | 0.0    | 5.1      |
| SNRI        | 56.3  | 1.2    | 5.4      |
| NRI         | 73.1  | 10.8   | 3.7      |
| NaSSA       | 23.2  | 1.9    | 8.7      |
| TCAplusBZD  | 28.1  | 5.9    | 8.2      |
| SSRIplusBZD | 42.6  | 2.0    | 6.7      |

**eFigure 24. Surface under the cumulative ranking curve of sensitivity analysis of adverse events**

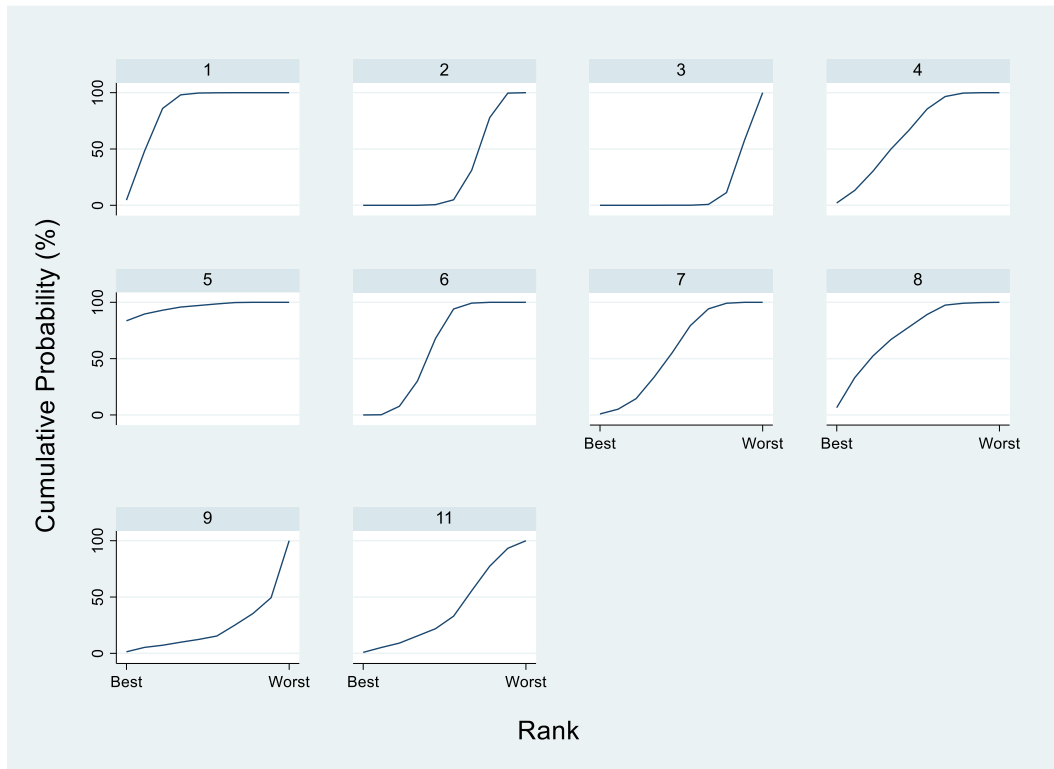

1) Placebo; 2) Tricyclic antidepressants; 3) Benzodiazepines; 4) Monoamine oxidase inhibitors; 5) Buspirone; 6) Selective serotonin reuptake inhibitor; 7) Selective serotonin reuptake inhibitor plus benzodiazepine; 8) Norepinephrine reuptake inhibitor; 9) noradrenergic and specific serotonergic antidepressants ;10) Tricyclic antidepressants plus benzodiazepine; 11) Selective serotonin reuptake inhibitor plus beta-blockers

| Treatment   | SUCRA | PrBest | MeanRank |
|-------------|-------|--------|----------|
| Placebo     | 81.8  | 4.6    | 2.6      |
| TCA         | 23.8  | 0.0    | 7.9      |
| BZD         | 7.8   | 0.0    | 9.3      |
| MOAI        | 60.4  | 2.1    | 4.6      |
| Buspirone   | 95.3  | 83.6   | 1.4      |
| SSRI        | 55.5  | 0.0    | 5.0      |
| SNRI        | 53.6  | 0.9    | 5.2      |
| NRI         | 69.2  | 6.5    | 3.8      |
| NaSSA       | 17.9  | 1.4    | 8.4      |
| SSRIplusBZD | 34.7  | 0.9    | 6.9      |

Figure 25. Comparison-adjusted and contour enhanced funnel plots of adverse events

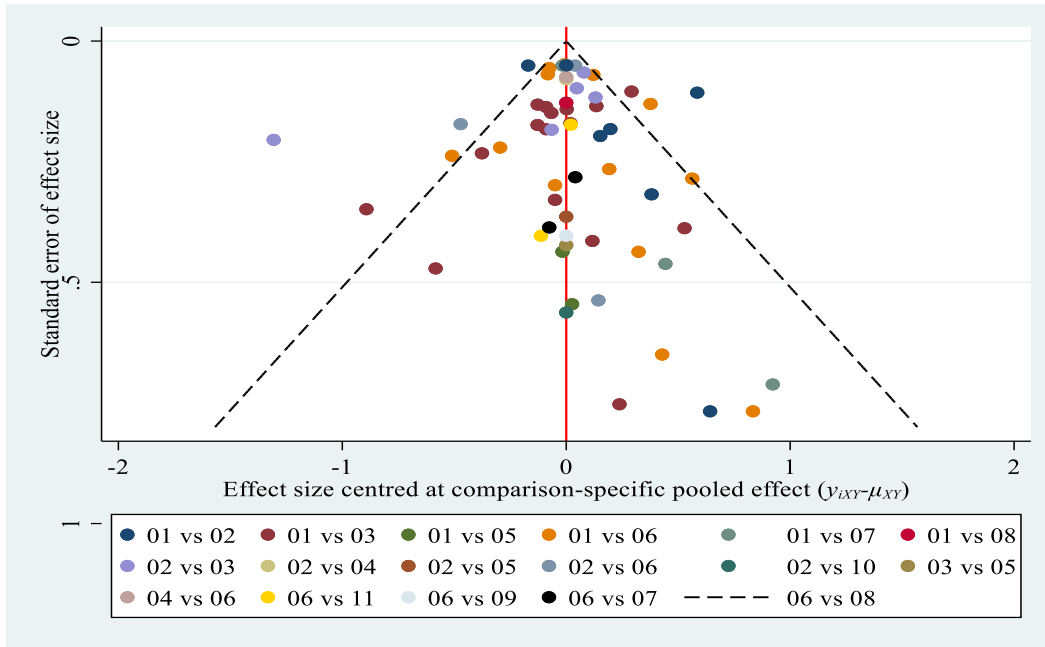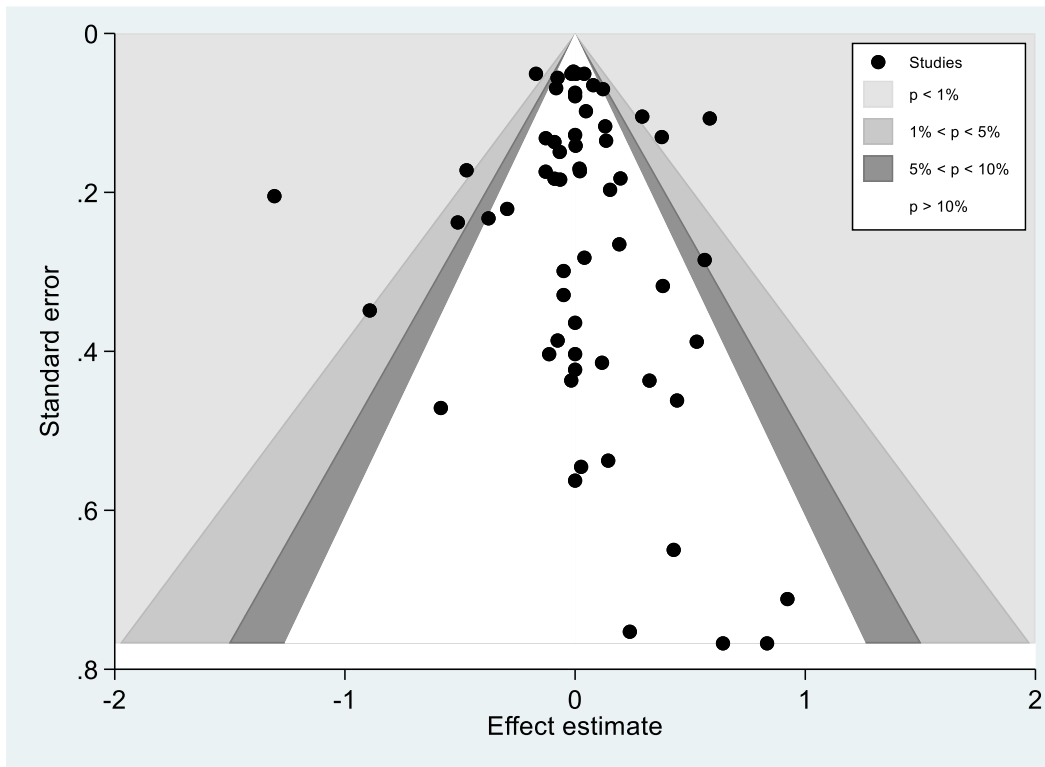

## eAppendix1: Search terms and strategy

### *Search terms and strategy for EMBASE:*

('panic'/exp OR 'panic' OR 'panic attack' OR 'panic disorder') AND ('antidepressant agent'/exp OR 'anti depressant agent' OR 'antidepressant' OR 'antidepressant agent' OR 'antidepressant drug' OR 'antidepressants' OR 'antidepressants, miscellaneous' OR 'antidepressant drug' OR 'antidepressive agent' OR 'antidepressive agents' OR 'antidepressive agents, second generation' OR 'antidepressive agents, second-generation' OR 'antidepressive drug' OR 'neurothymoleptic agent' OR 'psychoenergizer' OR 'thymoleptic' OR 'thymoleptic agent' OR 'thymoleptic drug' OR 'thymolytic agent' OR 'tricyclic antidepressant agent'/exp OR 'antidepressant, tricyclic' OR 'antidepressants, tricyclic' OR 'antidepressive agents, tricyclic' OR 'tricyclic antidepressant' OR 'tricyclic antidepressant agent' OR 'tricyclic antidepressants' OR 'tricyclic antidepressive agent' OR 'clomipramine'/exp OR '2 chloro 5 (3 dimethylaminopropyl) 10, 11 dihydrodibenz [6, f] azepine' OR '3 chloro 5 (3 dimethylaminopropyl) 10, 11 dihydro (5h) dibenz [b, f] azepine' OR '3 chloro 5 [(3 dimethylamin) propyl] 10, 11 dihydro 5h dibenz [b, f] azepine' OR '3 chloro 5 [3 (dimethylamino) propyl] 10, 11 dihydro 5h dibenz (b, f) azepine' OR '3 chloroimipramine' OR '5 (gamma dimethylaminopropyl) 3 chloroiminodibenzyl' OR 'anafranil' OR 'anafranil 25' OR 'anafranil retard' OR 'anafranil sr' OR 'anafranilin' OR 'anafranyl' OR 'chlomipramine' OR 'chlorimipramine' OR 'chlorimipramine hydrochloride' OR 'chloroimipramine' OR 'clofranil' OR 'clomicalm' OR 'clomipramin' OR 'clomipramine' OR 'clomipramine chlorhydrate' OR 'clomipramine hydrochloride' OR 'clopress' OR 'domipramine' OR 'equinorm' OR 'g 34586' OR 'g34586' OR 'gromin' OR 'hydiphen' OR 'monochlor imipramine' OR 'monochlorimipramine' OR 'monochloroimipramine' OR 'placil' OR 'zoiral' OR 'desipramine'/exp OR 'dosulepin'/exp OR 'doxepin'/exp OR 'imipramine'/exp OR 'lofepramine'/exp OR 'maprotiline'/exp OR 'nortriptyline'/exp OR 'amitriptyline'/exp OR 'protriptyline'/exp OR 'trimipramine'/exp OR 'serotonin uptake inhibitor'/exp OR 'fluoxetine'/exp OR 'fluvoxamine'/exp OR 'sertraline'/exp OR 'citalopram'/exp OR 'paroxetine'/exp OR 'escitalopram'/exp OR 'vortioxetine'/exp OR 'monoamine oxidase inhibitor'/exp OR 'phenelzine'/exp OR 'isocarboxazid'/exp OR 'tranylcypromine'/exp OR 'moclobemide'/exp OR 'brofaromine'/exp OR 'serotonin noradrenalin reuptake inhibitor'/exp OR 'venlafaxine'/exp OR 'desvenlafaxine'/exp OR 'duloxetine'/exp OR 'milnacipran'/exp OR 'noradrenergic and dopaminergic reuptake inhibitors' OR 'amfebutamone'/exp OR '1 (3 chlorophenyl) 2 [(1, 1 dimethylethyl) amino] 1 propanone' OR '2 tert butylamino 3` chloropropiophenone' OR 'amfebutamone' OR 'amfebutamone hydrochloride' OR 'aplenzin' OR 'budeprion' OR 'budeprion xl' OR 'buprion hydrochloride' OR 'bupropin' OR 'bupropion' OR 'bupropion hydrobromide' OR 'bupropion hydrochloride' OR 'bupropion' OR 'buxon' OR 'bw 323' OR 'bw 323u66' OR 'bw323' OR 'bw323u66' OR 'forfivo' OR 'forfivo xl' OR 'odranal' OR 'quomen' OR 'wellbatrin' OR 'wellbutrin' OR 'wellbutrin retard' OR 'wellbutrin sr' OR 'wellbutrin xl' OR 'wellbutrin xr' OR 'zyban' OR 'zyban lp' OR 'zyban sr' OR 'zyban sr refill' OR 'zyban sustained release' OR 'noradrenergic and specific serotonergic antidepressant'/exp OR 'mirtazapine'/exp OR 'noradrenergic reuptake inhibitors' OR 'reboxetine'/exp OR 'agomelatine'/exp OR 'trazodone'/exp OR nefazodone OR mianserine OR maprotiline OR 'benzodiazepine derivative'/exp OR alprazolam OR 'bretazenil'/exp OR 'bromazepam'/exp OR 'chlordiazepoxide'/exp OR 'cinolazepam'/exp OR 'clonazepam'/exp OR 'cloxazolam'/exp OR clorazepam OR deloramzepam OR 'diazepam'/exp OR 'estazolam'/exp OR 'etizolam'/exp OR 'fludiazepam'/exp OR 'flunitrazepam'/exp OR 'flurazepam'/exp OR 'flutoprazepam'/exp OR 'halazepam'/exp OR 'ketazolam'/exp OR 'loprazolam'/exp OR lormetazepam OR 'medazepam'/exp OR nimatazepam OR 'nitrazepam'/exp OR nodazepam OR 'oxazepam'/exp OR 'phenazepam'/exp OR 'pinazepam'/exp OR 'nordazepam'/exp OR 'health care quality'/exp OR 'temazepam'/exp OR 'tetrazepam'/exp OR 'triazolam'/exp OR 'azapirone'/exp OR alnespirone OR 'binospirone'/exp OR 'buspirone'/exp OR enilospirone OR 'phenytoin'/exp OR 'gepirone'/exp OR 'ipsapirone'/exp OR 'revospirone'/exp OR 'tandospirone'/exp OR 'zalospirone'/exp OR 'neuroleptic agent'/exp OR 'quetiapine'/exp OR 'beta adrenergic receptor blocking agent'/exp OR 'clonidine'/exp) AND ('randomized controlled trial'/exp OR 'controlled clinical trial'/exp)

***Search terms and strategy for Medline:***

Search (((((((((((((((((((((((((((("Antidepressive Agents"[Mesh]) OR clomipramine) OR desipramine) OR dosulepin) OR dothiepin) OR doxepin) OR imipramine) OR lofepramine) OR maprotiline) OR nortriptyline) OR amitriptyline) OR moclobemide) OR phenelzine) OR tranylcypromine) OR amoxapine) OR protriptyline) OR trimipramine) OR isocarboxazid) OR brofaromine)) OR (((((((("Selective serotonin reuptake inhibitors") OR "Selective serotonin reuptake inhibitor") OR citalopram) OR escitalopram) OR fluoxetine) OR fluvoxamine) OR paroxetine) OR sertraline) OR vortioxetine)) OR (((((((("Serotonin-noradrenaline reuptake inhibitors") OR "Serotonin-noradrenaline reuptake inhibitor") OR desvenlafaxine) OR duloxetine) OR milnacipran) OR venlafaxine) OR levomilnacipran) OR ("Serotonin and Noradrenaline Reuptake Inhibitors"[Mesh])) OR "Serotonin Uptake Inhibitors"[Mesh])) OR (((("Noradrenergic and specific serotonergic antidepressants"))) OR ("Noradrenergic and specific serotonergic antidepressant"))) OR mirtazapine)) OR (((("Noradrenergic and dopaminergic reuptake inhibitors"))) OR ("Noradrenergic and dopaminergic reuptake inhibitor"))) OR bupropion)) OR (((("Noradrenergic reuptake inhibitors") OR "Noradrenergic reuptake inhibitor") OR reboxetine)) OR (((agomelatine) OR trazodone) OR nefazodone) OR mianserin) OR buspirone))) OR (((((((((((((((((((((((("Benzodiazepines"[Mesh]) OR Alprazolam) OR bretazenil) OR bromazepam) OR chlordiazepoxide) OR cinolazepam) OR clonazepam) OR cloxazolam) OR clorazepate) OR diazepam) OR estazolam) OR etizolam) OR fludiazepam) OR flunitrazepam) OR delorazepam) OR flurazepam) OR flutoprazepam) OR halazepam) OR ketazolam) OR loprazolam) OR lorazepam) OR lormetazepam) OR medazepam) OR nimatazepam) OR nitrazepam) OR nodazepam) OR oxazepam) OR phenazepam) OR pinazepam) OR prazepam) OR premapazepam) OR quazepam) OR temazepam) OR tetrazepam) OR triazolam)) OR ("Antipsychotic Agents"[Mesh]) OR quetiapine)) OR ("Adrenergic beta-Antagonists"[Mesh]) OR clonidine)) OR (((((((((((Azapirones) OR Azapirone) OR Alnespirone) OR binospirone) OR buspirone) OR enilospirone) OR eptapirone) OR gepirone) OR ipsapirone) OR revospirone) OR tandospirone) OR zalospirone))) AND ("Panic Disorder"[Mesh]) OR panic) Filters: Clinical Trial; Controlled Clinical Trial; Randomized Controlled Trial; Clinical Trial, Phase I; Clinical Trial, Phase II; Clinical Trial, Phase III; Clinical Trial, Phase IV; Comparative Study

## **eAppendix2: Assessment of evidence certainty**

The certainty of evidence for network meta-analysis (NMA) of primary outcomes (i.e., remission and drop-out) and outcome considered in cluster ranking plot (i.e., adverse events) were assessed using the Confidence in Network Meta-Analysis (CINeMA) tool. CINeMA tool consists 6 domains: 1) within-study bias, 2) reporting bias, 3) indirectness, 4) imprecision, 5) heterogeneity, and 6) incoherence. Confidence of each domain was graded as no concerns, some concerns, or major concerns. Criteria used for grading of each domain are described as follows.

### **1. Within-study bias**

Risk of bias for each direct comparison was scored as 1 for low risk, 2 for some concern, and 3 for high risk of bias. The judgement of within-study bias for each treatment comparison in the network was estimated using a weighted average of the risk of bias from all direct estimates in the network. Weighted average of the risk of bias was calculated using the percentage of direct comparisons that were contributed for each mixed and indirect estimate from the NMA. Percent contributions of the direct comparisons were suggested by the contribution matrix of contribution plot (see eAppendix Figure 1, 2, 3, 4, and 5).

### **2. Indirectness**

Transitivity of the studies included in NMA was assessed by comparing characteristics of patients (i.e., mean age, percentages of female and presence of agoraphobia, and mean duration of panic disorder) and interventions (i.e., duration of treatment) among studies included in the NMA (see eAppendix Table 1 and 2). Different distributions of these characteristics across treatment comparisons indicated intransitivity.

### **3. Imprecision**

Clinically meaningful threshold of risk ratio was defined as 0.80 or 1.25. This domain was rated as major concern, if RR point estimate was  $\geq 1$  and the lower limit of its confidence interval (CI) was  $< 0.80$  or RR point estimate was  $\leq 1$  and the upper limit of its CI  $> 1.25$ . A rating of 'some concerns' was assigned, if the 95% CI of RR was over 1 but the lower and upper limits of 95% CI did not extend beyond 0.80 and 1.25.

#### 4. Heterogeneity

Predictive interval plot was applied to assess the heterogeneity of NMA (see eAppendix Figures 11, 12, 13, 14, 15). Heterogeneity was judged as 'no concerns' if confidence and predictive intervals of treatment comparisons had the same conclusion. If confidence and predictive intervals had different conclusions but the upper or lower limits of predictive intervals did not extend beyond 0.80 or 1.25 (i.e., clinical meaningful threshold), the heterogeneity was rated as 'some concerns', otherwise this domain was rated as 'major concerns'.

#### 5. Incoherence

For treatment comparisons that had both direct and indirect estimates, node splitting test that compared direct and indirect estimates of each treatment comparisons was applied to assess incoherence. If direct and indirect estimates had the same conclusion, incoherence was rated as 'no concerns'. If direct and indirect estimates had different conclusions but the upper or lower limits of indirect estimates did not extend beyond 0.80 or 1.25 (i.e., clinical meaningful threshold), the heterogeneity was rated as 'some concerns', otherwise this domain was rated as 'major concerns'. For treatment comparisons that had only indirect estimates, we used the P-value from global test to rate the confidence of this domain. P-values of global test for remission and drop-out were higher than 0.05, this



domain was rated 'no concerns' for these outcomes. For adverse events, firstly, P-value of global test was less than 0.05. We performed sensitivity analysis by excluding the studies that had different characteristics (i.e., high percentages of female and presence of agoraphobia). After excluding these studies, P-value from global test was higher than 0.05. Therefore, we assumed that the model was consistent, and incoherence was judged as 'no concerns'.

#### 6. Publication bias

Comparison-adjusted funnel plot was applied to assess publication bias. This domain was rated as undetected, if there was no deviation suggested from comparison-adjusted funnel plot.

### ***Overall confidence***

Overall confidence was classified as high, moderate, low, and very low confidence. We started with high confidence and drop the level of confidence by 1 step for each domain with some concerns, and by 2 levels for each domain with major concerns. However, indirectness was related with incoherence and heterogeneity, imprecision, reporting, and within-study bias were also related with each other. Therefore, confidence of these domains was considered together rather than in separation.

**eAppendix Figure 1.** Contribution plot of network meta-analysis of remission outcome for drug classes

|                                 |                  | Direct comparisons in the network |        |        |        |        |        |        |        |        |        |        |        |        |        |        |        |        |  |
|---------------------------------|------------------|-----------------------------------|--------|--------|--------|--------|--------|--------|--------|--------|--------|--------|--------|--------|--------|--------|--------|--------|--|
|                                 |                  | 01vs02                            | 01vs03 | 01vs04 | 01vs06 | 01vs07 | 01vs08 | 01vs09 | 02vs03 | 02vs06 | 02vs07 | 03vs04 | 03vs06 | 03vs07 | 05vs07 | 07vs08 | 07vs09 | 07vs10 |  |
| Network meta-analysis estimates | Mixed estimates  |                                   |        |        |        |        |        |        |        |        |        |        |        |        |        |        |        |        |  |
|                                 | 01vs02           | 39.4                              | 27.6   | 0.2    | 0.4    | 4.5    | 0.7    | 0.1    | 25.4   | 0.2    | 2.9    | 0.2    | 0.2    | 2.5    |        | 0.7    | 0.1    |        |  |
|                                 | 01vs03           | 21.1                              | 41.3   | 0.3    | 0.5    | 5.4    | 0.9    | 0.1    | 22.3   |        | 1.2    | 0.3    | 0.5    | 5.2    |        | 0.9    | 0.1    |        |  |
|                                 | 01vs04           | 9.9                               | 19.4   | 20.6   | 0.2    | 2.5    | 0.4    |        | 10.5   |        | 0.6    | 32.6   | 0.2    | 2.4    |        | 0.4    |        |        |  |
|                                 | 01vs06           | 10.8                              | 15.2   | 0.1    | 35.4   | 2.2    | 0.4    |        | 4.2    | 7.3    | 0.7    | 0.1    | 21.4   | 1.9    |        | 0.4    |        |        |  |
|                                 | 01vs07           | 6.9                               | 8.8    | 0.1    | 0.1    | 49.0   | 8.1    | 0.7    | 1.5    |        | 5.3    | 0.1    | 0.1    | 10.5   |        | 8.1    | 0.7    |        |  |
|                                 | 01vs08           | 2.4                               | 3.1    |        |        | 17.1   | 48.0   | 0.2    | 0.5    |        | 1.9    |        |        | 3.6    |        | 22.8   | 0.2    |        |  |
|                                 | 01vs09           | 2.9                               | 3.7    |        |        | 20.5   | 3.4    | 28.1   | 0.6    |        | 2.2    |        |        | 4.4    |        | 3.4    | 30.6   |        |  |
|                                 | 02vs03           | 20.9                              | 19.7   | 0.1    | 0.1    | 0.8    | 0.1    |        | 52.6   | 0.2    | 1.9    | 0.1    | 0.3    | 2.9    |        | 0.1    |        |        |  |
|                                 | 02vs06           | 20.3                              | 4.7    |        | 26.9   | 1.6    | 0.3    |        | 21.7   | 5.7    | 1.6    |        | 16.6   | 0.3    |        | 0.3    |        |        |  |
|                                 | 02vs07           | 22.0                              | 9.7    | 0.1    | 0.2    | 27.0   | 4.5    | 0.4    | 17.9   | 0.1    | 5.2    | 0.1    | 0.1    | 8.1    |        | 4.5    | 0.4    |        |  |
|                                 | 03vs04           | 7.5                               | 14.7   | 24.7   | 0.2    | 1.9    | 0.3    |        | 8.0    |        | 0.4    | 39.7   | 0.2    | 1.9    |        | 0.3    |        |        |  |
|                                 | 03vs06           | 7.3                               | 19.1   | 0.1    | 29.3   | 2.4    | 0.4    |        | 13.7   | 6.1    | 0.3    | 0.1    | 18.3   | 2.4    |        | 0.4    |        |        |  |
|                                 | 03vs07           | 10.0                              | 22.5   | 0.2    | 0.3    | 27.9   | 4.6    | 0.4    | 14.2   |        | 4.2    | 0.2    | 0.3    | 10.3   |        | 4.6    | 0.4    |        |  |
|                                 | 05vs07           |                                   |        |        |        |        |        |        |        |        |        |        |        |        | 100.0  |        |        |        |  |
|                                 | 07vs08           | 3.4                               | 4.4    |        | 0.1    | 24.6   | 32.9   | 0.4    | 0.8    |        | 2.7    |        |        | 5.3    |        | 25.1   | 0.4    |        |  |
|                                 | 07vs09           | 2.7                               | 3.5    |        |        | 19.3   | 3.2    | 28.7   | 0.6    |        | 2.1    |        |        | 4.1    |        | 3.2    | 32.4   |        |  |
|                                 | 07vs10           |                                   |        |        |        |        |        |        |        |        |        |        |        |        |        |        |        | 100.0  |  |
|                                 |                  | Indirect estimates                |        |        |        |        |        |        |        |        |        |        |        |        |        |        |        |        |  |
|                                 |                  | 01vs05                            | 3.9    | 5.1    |        | 0.1    | 28.2   | 4.7    | 0.4    | 0.9    |        | 3.1    |        | 0.1    | 6.0    | 42.4   | 4.7    | 0.4    |  |
|                                 |                  | 01vs10                            | 4.0    | 5.1    |        | 0.1    | 28.2   | 4.7    | 0.4    | 0.9    |        | 3.1    |        | 0.1    | 6.0    |        | 4.7    | 0.4    |  |
|                                 |                  | 02vs04                            | 19.0   | 1.5    | 18.6   | 0.1    | 0.9    | 0.2    |        | 27.6   | 0.1    | 1.5    | 29.7   | 0.1    | 0.5    |        | 0.2    |        |  |
|                                 |                  | 02vs05                            | 15.1   | 6.7    |        | 0.1    | 18.6   | 3.1    | 0.3    | 12.3   | 0.1    | 3.6    |        | 5.6    | 31.1   | 3.1    | 0.3    |        |  |
|                                 |                  | 02vs08                            | 21.3   | 11.3   |        | 0.1    | 6.8    | 25.9   | 0.1    | 14.9   | 0.1    | 2.7    | 0.1    | 0.1    | 3.4    |        | 13.0   | 0.1    |  |
|                                 |                  | 02vs09                            | 19.2   | 9.8    |        | 0.1    | 10.2   | 1.7    | 17.3   | 13.9   | 0.1    | 2.9    | 0.1    | 0.1    | 4.0    |        | 1.7    | 18.8   |  |
|                                 |                  | 02vs10                            | 15.2   | 6.7    |        | 0.1    | 18.6   | 3.1    | 0.3    | 12.3   | 0.1    | 3.6    |        | 5.6    |        | 3.1    | 0.3    | 31.1   |  |
|                                 |                  | 03vs05                            | 6.8    | 15.3   |        | 0.1    | 0.2    | 18.9   | 3.1    | 0.3    | 9.7    |        | 2.9    | 0.1    | 0.2    | 7.0    | 3.1    | 0.3    |  |
|                                 |                  | 03vs08                            | 10.8   | 22.1   | 0.2    | 0.3    | 6.6    | 26.7   | 0.1    | 12.6   |        | 1.7    | 0.2    | 0.2    | 5.1    |        | 13.5   | 0.1    |  |
|                                 |                  | 03vs09                            | 9.5    | 19.8   | 0.1    | 0.2    | 10.2   | 1.7    | 17.8   | 11.6   |        | 2.1    | 0.1    | 0.2    | 5.6    |        | 1.7    | 19.5   |  |
|                                 |                  | 03vs10                            | 6.8    | 15.3   |        | 0.1    | 18.6   | 3.1    | 0.3    | 9.7    |        | 2.9    | 0.1    | 0.2    | 7.0    |        | 3.1    | 0.3    |  |
|                                 |                  | 04vs05                            | 2.6    | 6.8    | 10.7   | 0.1    | 17.0   | 2.8    | 0.2    | 4.9    |        | 2.3    | 16.9   | 0.1    | 5.2    | 27.5   | 2.8    | 0.2    |  |
|                                 |                  | 04vs06                            | 0.8    | 9.5    | 16.7   | 23.7   | 0.6    | 0.1    | 0.3    | 5.7    | 4.9    |        | 26.5   | 14.6   | 0.7    | 0.1    |        |        |  |
|                                 |                  | 04vs07                            | 3.6    | 9.3    | 14.7   | 0.1    | 23.5   | 3.9    | 0.3    | 6.7    |        | 3.2    | 23.3   | 0.1    | 7.1    |        | 3.9    | 0.3    |  |
|                                 |                  | 04vs08                            | 5.1    | 10.7   | 12.9   | 0.1    | 6.4    | 22.3   | 0.1    | 6.3    |        | 1.2    | 20.4   | 0.1    | 3.2    |        | 11.0   | 0.1    |  |
|                                 | 04vs09           | 4.3                               | 9.4    | 12.1   | 0.1    | 9.4    | 1.6    | 14.9   | 5.8    |        | 1.5    | 19.1   | 0.1    | 3.8    |        | 1.6    | 16.3   |        |  |
|                                 | 04vs10           | 2.6                               | 6.8    | 10.7   | 0.1    | 17.0   | 2.8    | 0.2    | 4.9    |        | 2.3    | 16.9   | 0.1    | 5.2    |        | 2.8    | 0.2    |        |  |
|                                 | 05vs06           | 2.2                               | 3.5    |        | 16.4   | 18.8   | 3.1    | 0.3    | 1.3    | 3.4    |        | 2.5    |        | 10.0   |        | 3.1    | 0.3    |        |  |
|                                 | 05vs08           | 2.2                               | 2.8    |        |        | 15.6   | 20.8   | 0.2    | 0.5    |        | 1.7    |        |        |        |        | 36.7   | 15.9   |        |  |
|                                 | 05vs09           | 1.7                               | 2.1    |        |        | 12.0   | 2.0    | 17.8   | 0.4    |        | 1.3    |        |        |        |        | 38.0   | 2.0    |        |  |
|                                 | 05vs10           |                                   |        |        |        |        |        |        |        |        |        |        |        |        | 50.0   |        | 20.1   |        |  |
|                                 | 06vs07           | 3.2                               | 5.0    |        | 23.4   | 26.8   | 4.4    | 0.4    | 1.9    | 4.8    |        | 3.5    |        | 14.2   | 7.3    | 4.4    | 0.4    |        |  |
|                                 | 06vs08           | 4.9                               | 7.1    | 0.1    | 20.3   | 7.6    | 24.7   | 0.1    | 2.1    | 4.2    | 1.4    |        | 0.1    | 12.3   | 3.0    | 12.1   | 0.1    |        |  |
|                                 | 06vs09           | 4.1                               | 6.0    |        | 18.9   | 10.8   | 1.8    | 16.4   | 1.9    | 3.9    | 1.7    |        |        | 11.4   | 3.6    | 1.8    | 17.8   |        |  |
|                                 | 06vs10           | 2.2                               | 3.5    |        | 16.4   | 18.8   | 3.1    | 0.3    | 1.3    | 3.4    |        | 2.5    |        | 10.0   | 5.1    | 3.1    | 0.3    |        |  |
|                                 | 08vs09           | 0.7                               | 0.9    |        |        | 5.0    | 28.4   | 21.8   | 0.2    |        | 0.5    |        |        |        | 1.1    | 17.4   | 24.0   |        |  |
|                                 | 08vs10           | 2.2                               | 2.8    |        |        | 15.6   | 20.8   | 0.2    | 0.5    |        | 1.7    |        |        |        | 3.3    | 15.9   | 0.2    |        |  |
|                                 | 09vs10           | 1.7                               | 2.1    |        |        | 12.0   | 2.0    | 17.8   | 0.4    |        | 1.3    |        |        |        | 2.6    | 2.0    | 20.1   |        |  |
|                                 | Entire network   | 7.6                               | 8.8    | 3.4    | 4.8    | 13.8   | 7.3    | 4.2    | 7.6    | 1.0    | 2.1    | 5.3    | 3.0    | 4.3    | 8.6    | 5.1    | 4.7    | 8.5    |  |
|                                 | Included studies | 12                                | 18     | 1      | 3      | 18     | 4      | 1      | 6      | 2      | 5      | 1      | 1      | 1      | 1      | 2      | 1      | 1      |  |

eAppendix Figure 2. Contribution plot of network meta-analysis of drop-out for drug classes

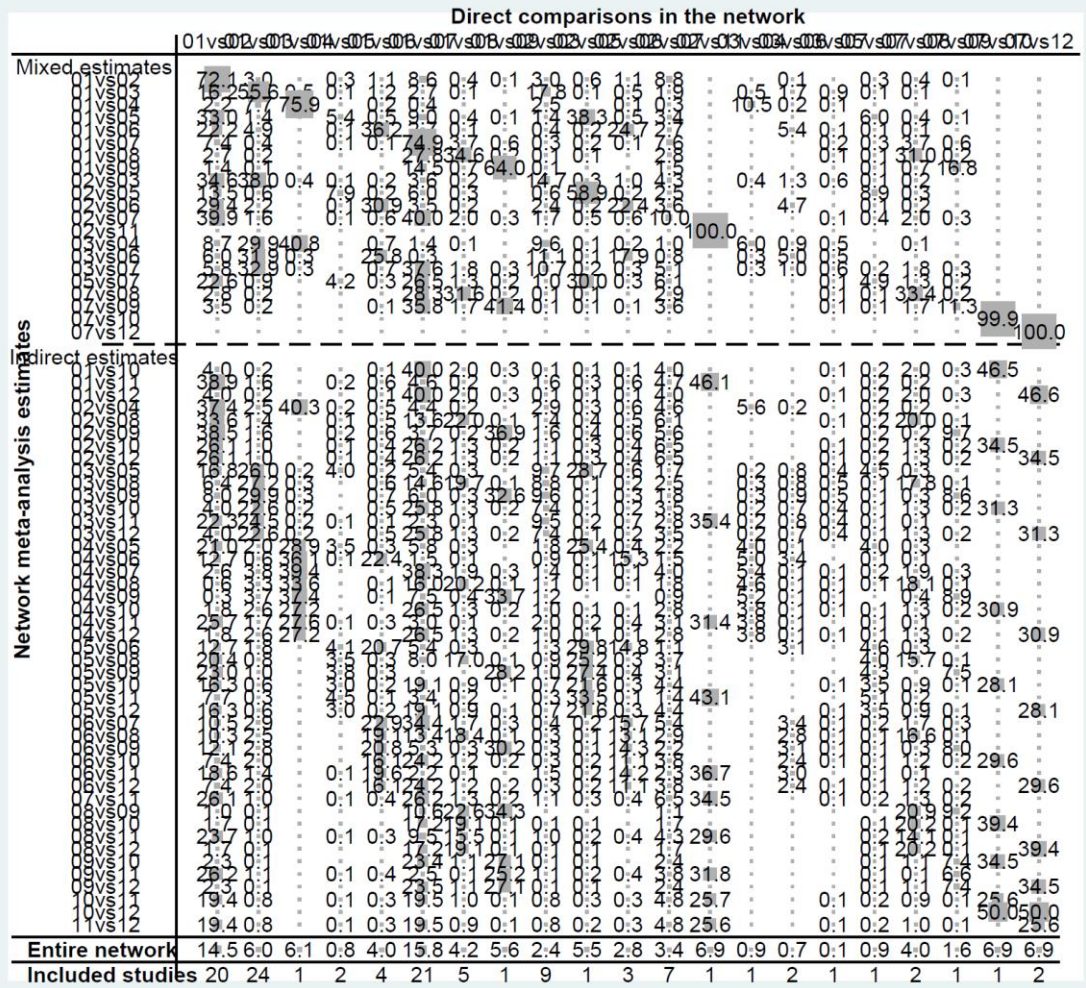



**eAppendix Figure 4.** Contribution plot of network meta-analysis of remission for individual SSRIs

|                                 |                  | Direct comparisons in the network |       |      |       |      |      |      |      |       |      |      |
|---------------------------------|------------------|-----------------------------------|-------|------|-------|------|------|------|------|-------|------|------|
|                                 |                  | 1vs2                              | 1vs3  | 1vs4 | 1vs5  | 1vs6 | 1vs7 | 2vs7 | 4vs7 | 4vs8  | 6vs7 |      |
| Network meta-analysis estimates | Mixed estimates  |                                   |       |      |       |      |      |      |      |       |      |      |
|                                 | 1vs2             | 41.3                              |       | 1:9  |       | 8:7  | 13.5 | 24.1 | 1:9  |       | 8:7  |      |
|                                 | 1vs3             |                                   | 100.0 |      |       |      |      |      |      |       |      |      |
|                                 | 1vs4             | 0.7                               |       | 90.4 |       | 1:2  | 1:9  | 0.7  | 3:8  |       | 1:2  |      |
|                                 | 1vs5             |                                   |       |      | 100.0 |      |      |      |      |       |      |      |
|                                 | 1vs6             | 6:2                               |       | 2:2  |       | 43.3 | 15.7 | 6:2  | 2:2  |       | 24.1 |      |
|                                 | 1vs7             | 11.7                              |       | 4:3  |       | 19.1 | 29.8 | 11.7 | 4:3  |       | 19.1 |      |
|                                 | 2vs7             | 27.3                              |       | 2:2  |       | 9:8  | 15.3 | 33.3 | 2:2  |       | 9:8  |      |
|                                 | 4vs7             | 7:4                               |       | 38.1 |       | 12.0 | 18.7 | 7:4  | 4:5  |       | 12.0 |      |
|                                 | 4vs8             |                                   |       |      |       |      |      |      |      | 100.0 |      |      |
|                                 | 6vs7             | 6:1                               |       | 2:2  |       | 23.6 | 15.4 | 6:1  | 2:2  |       | 44.5 |      |
|                                 |                  | Indirect estimates                |       |      |       |      |      |      |      |       |      |      |
|                                 |                  | 1vs8                              | 0.4   |      | 46.5  |      | 0.6  | 1.0  | 0.4  | 2:0   | 48.5 | 0.6  |
|                                 |                  | 2vs3                              | 25.0  | 39.5 | 1:2   |      | 5:2  | 8:2  | 14.6 | 1:2   |      | 5:2  |
|                                 |                  | 2vs4                              | 25.7  |      | 38.3  |      | 4:9  | 7:7  | 15.5 | 2:9   |      | 4:9  |
|                                 |                  | 2vs5                              | 25.0  |      | 1:2   | 39.5 | 5:2  | 8:2  | 14.6 | 1:2   |      | 5:2  |
|                                 |                  | 2vs6                              | 26.5  |      | 0.2   |      | 25.0 | 1:3  | 22.6 | 0.2   |      | 24.1 |
|                                 |                  | 2vs8                              | 18.2  |      | 27.1  |      | 3:5  | 5:4  | 11.0 | 2:0   | 29.2 | 3:5  |
|                                 |                  | 3vs4                              | 0.4   | 48.5 | 46.5  |      | 0.6  | 1.0  | 0.4  | 2:0   |      | 0.6  |
|                                 |                  | 3vs5                              |       | 50.0 |       | 50.0 |      |      |      |       |      |      |
|                                 |                  | 3vs6                              | 3:7   | 40.3 | 1:3   |      | 25.8 | 9:4  | 3:7  | 1:3   |      | 14.4 |
|                                 |                  | 3vs7                              | 7:1   | 39.3 | 2:6   |      | 11.6 | 18.1 | 7:1  | 2:6   |      | 11.6 |
|                                 |                  | 3vs8                              | 0.3   | 32.7 | 31.3  |      | 0.4  | 0.7  | 0.3  | 1:3   | 32.7 | 0.4  |
|                                 |                  | 4vs5                              | 0.4   |      | 46.5  | 48.5 | 0.6  | 1:0  | 0.4  | 2:0   |      | 0.6  |
|                                 |                  | 4vs6                              | 3:5   |      | 38.9  |      | 26.4 | 8:9  | 3:5  | 3:1   |      | 15.6 |
|                                 | 5vs6             | 3:7                               |       | 1:3  | 40.3  | 25.8 | 9:4  | 3:7  | 1:3  |       | 14.4 |      |
|                                 | 5vs7             | 7:1                               |       | 2:6  | 39.4  | 11.6 | 18.1 | 7:1  | 2:6  |       | 11.6 |      |
|                                 | 5vs8             | 0.3                               |       | 31.3 | 32.7  | 0.4  | 0.7  | 0.3  | 1:3  | 32.7  | 0.4  |      |
|                                 | 6vs8             | 2:5                               |       | 27.4 |       | 18.6 | 6:3  | 2:5  | 2:2  | 29.6  | 11:0 |      |
|                                 | 7vs8             | 5:2                               |       | 26.7 |       | 8:4  | 13.1 | 5:2  | 3:2  | 29.9  | 8:4  |      |
|                                 | Entire network   | 9:3                               | 11.6  | 19.4 | 11.6  | 10.5 | 8:3  | 7:2  | 2:0  | 11.6  | 8:7  |      |
|                                 | Included studies | 2                                 | 5     | 7    | 3     | 1    | 1    | 1    | 2    | 1     | 1    |      |

**eAppendix Figure 5.** Contribution plot of network meta-analysis of adverse drug events for individual SSRIs

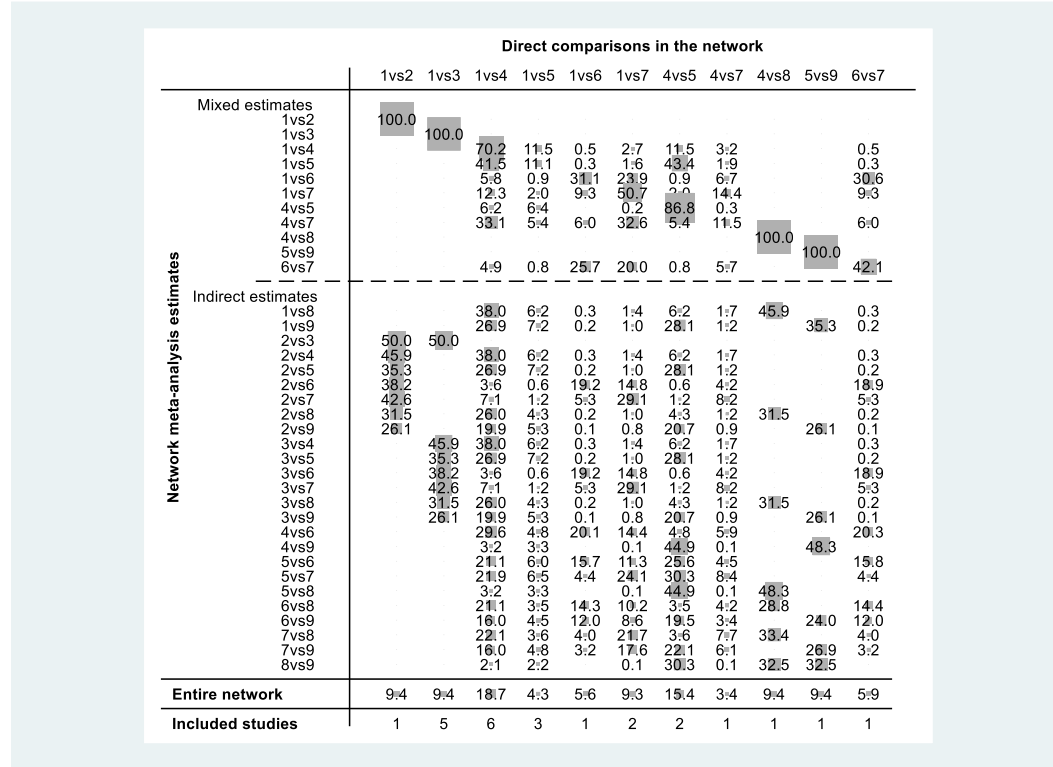

**eAppendix Figure 6.** Predictive interval plot of network meta-analysis of remission for drug classes

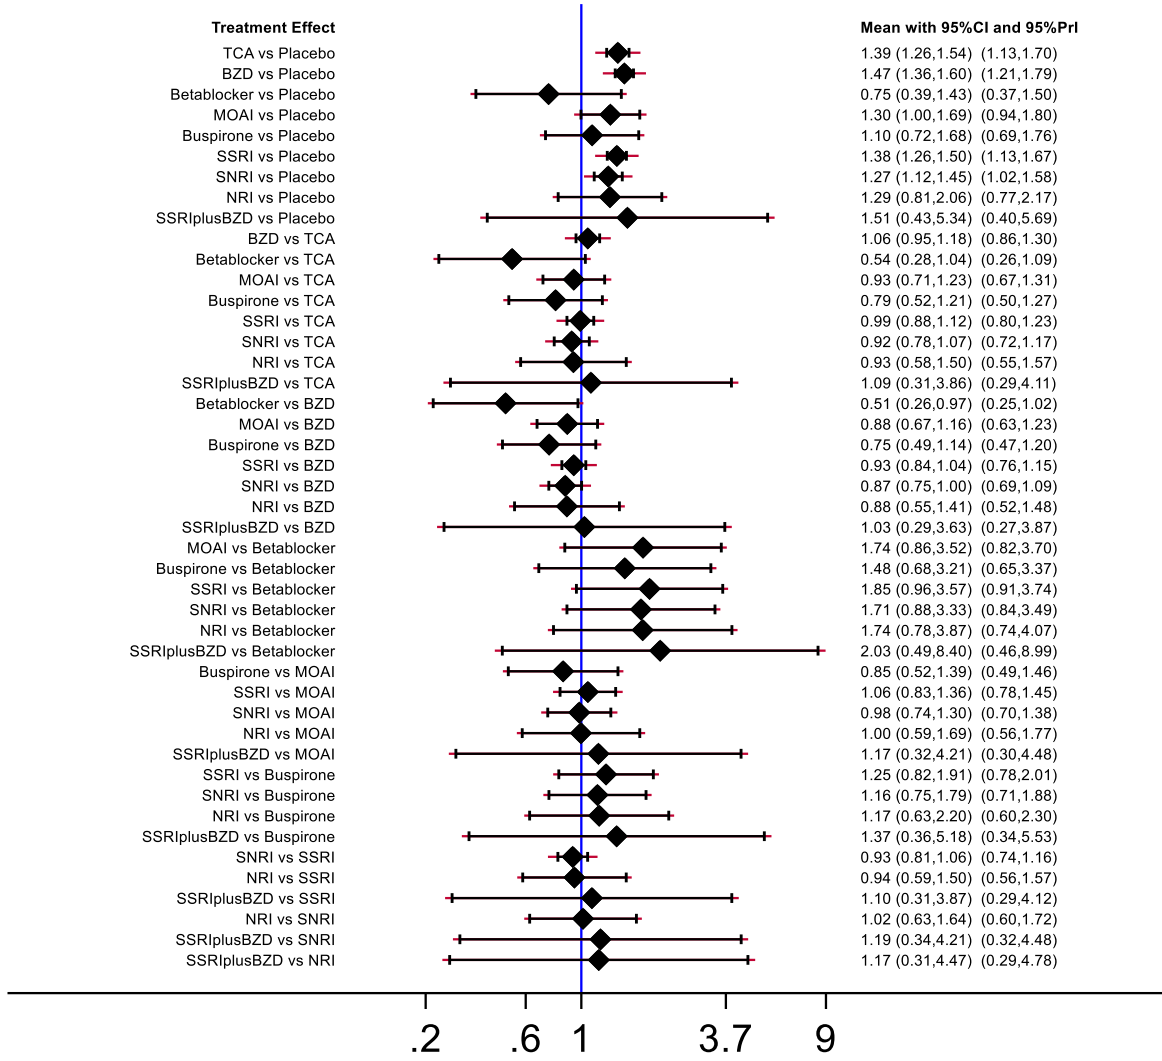

**eAppendix Figure 7.** Predictive interval plot of network meta-analysis of drop-out for drug classes

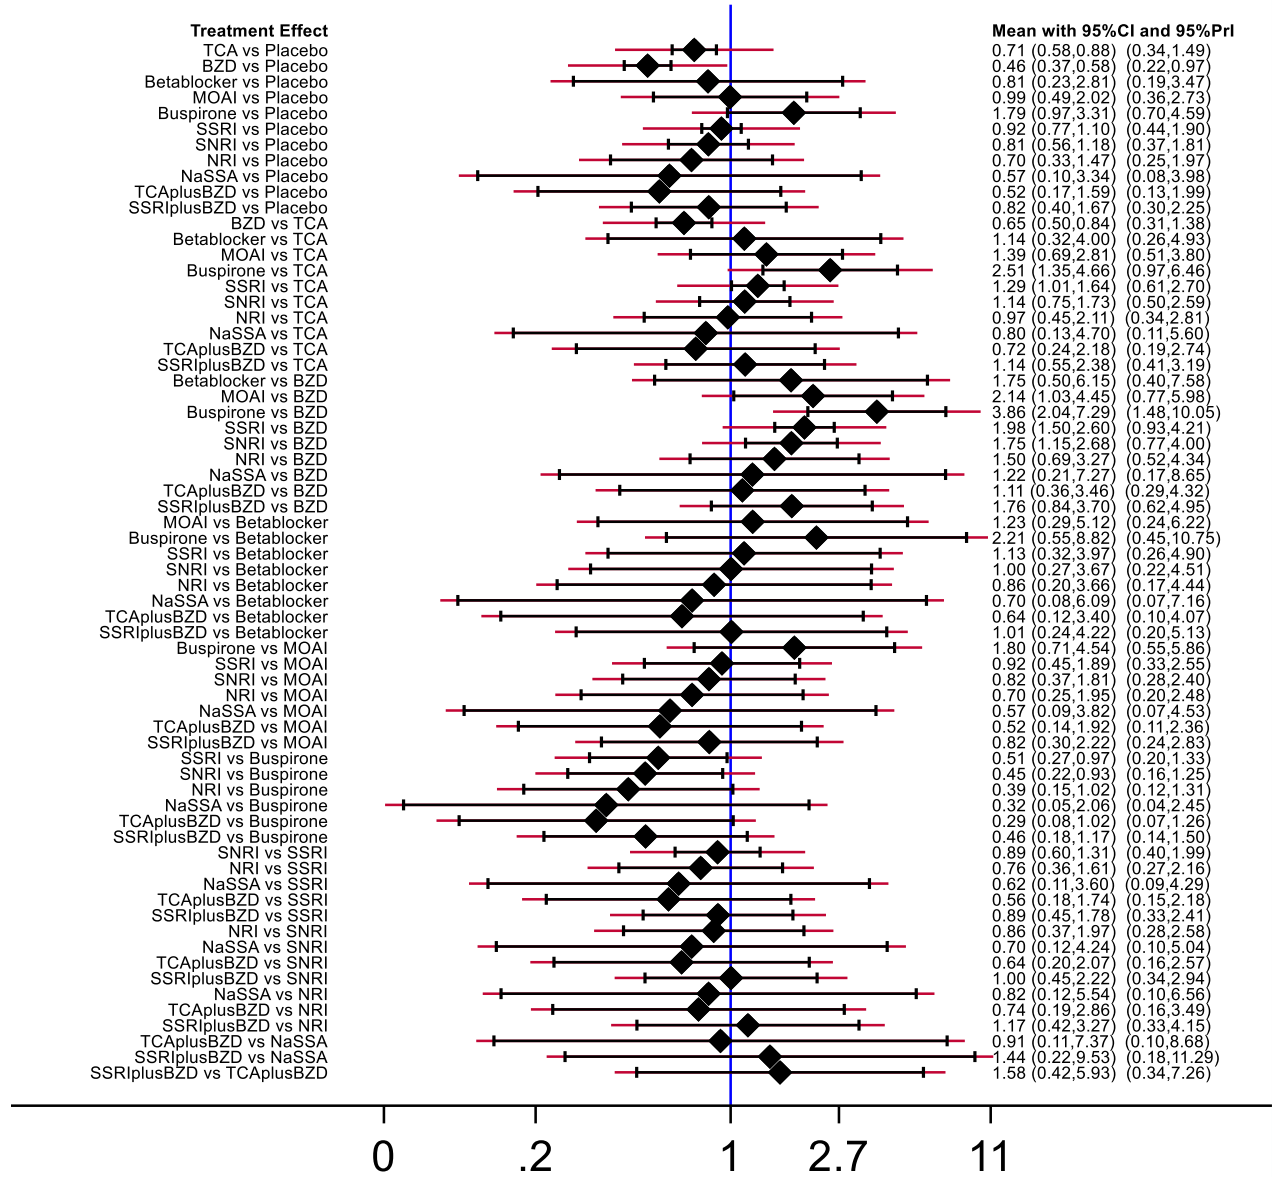



**eAppendix Figure 8.** Predictive interval plot of network meta-analysis of adverse drug events for drug classes

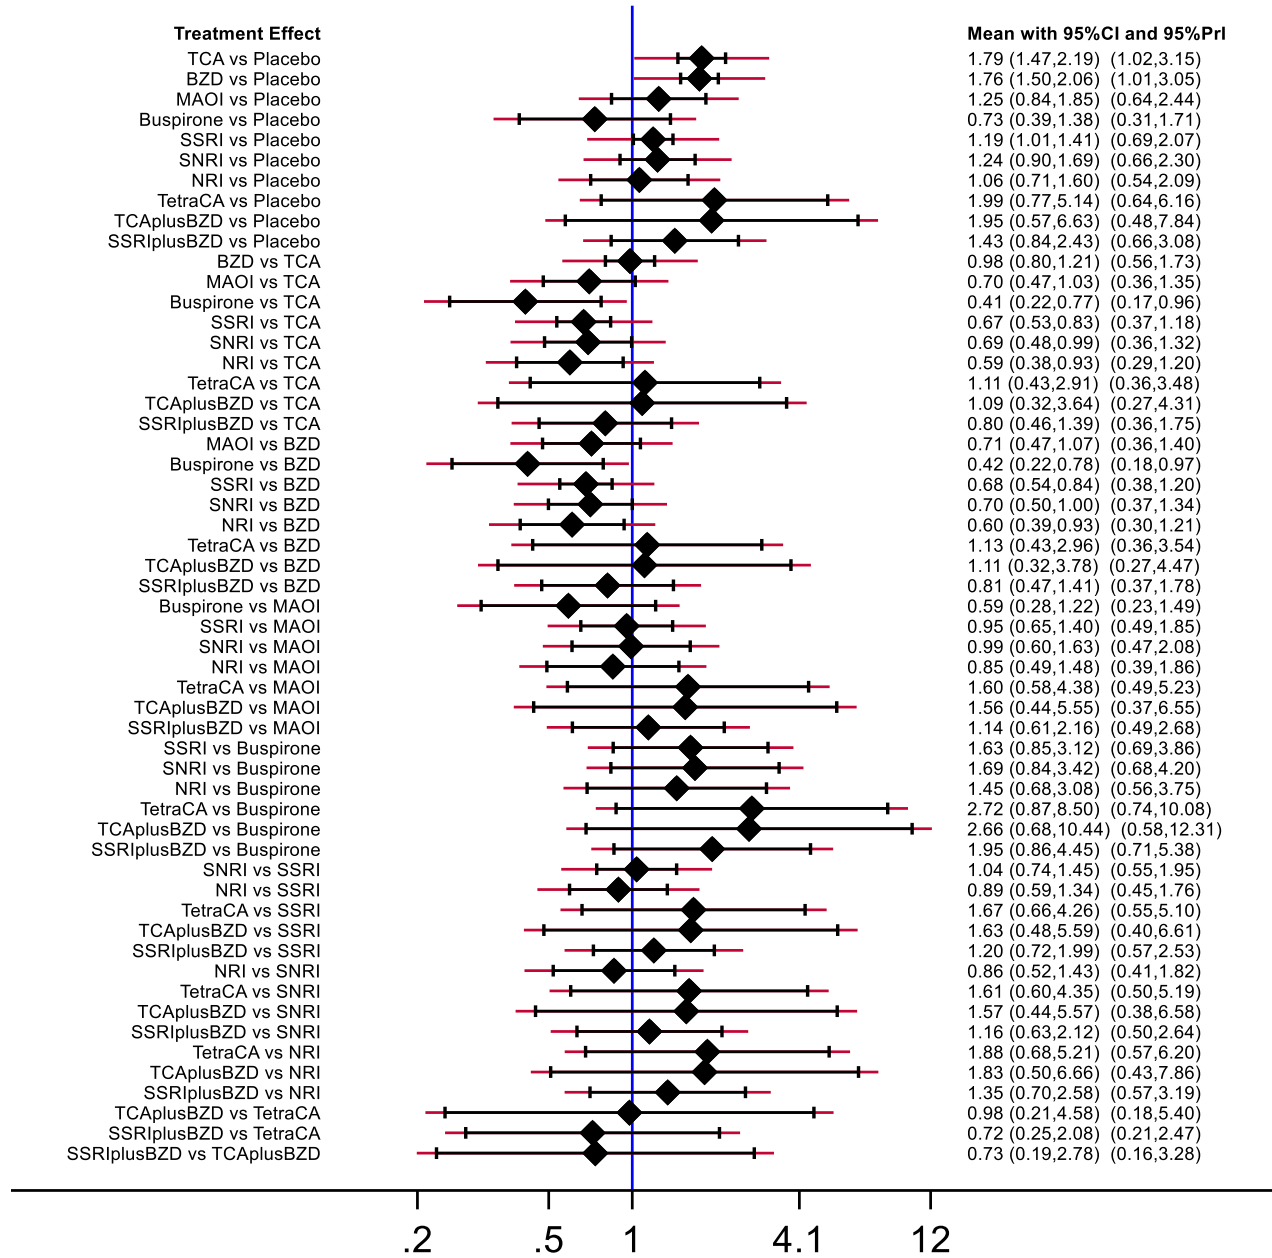

**eAppendix Figure 9.** Predictive interval plot of network meta-analysis of remission for individual SSRIs

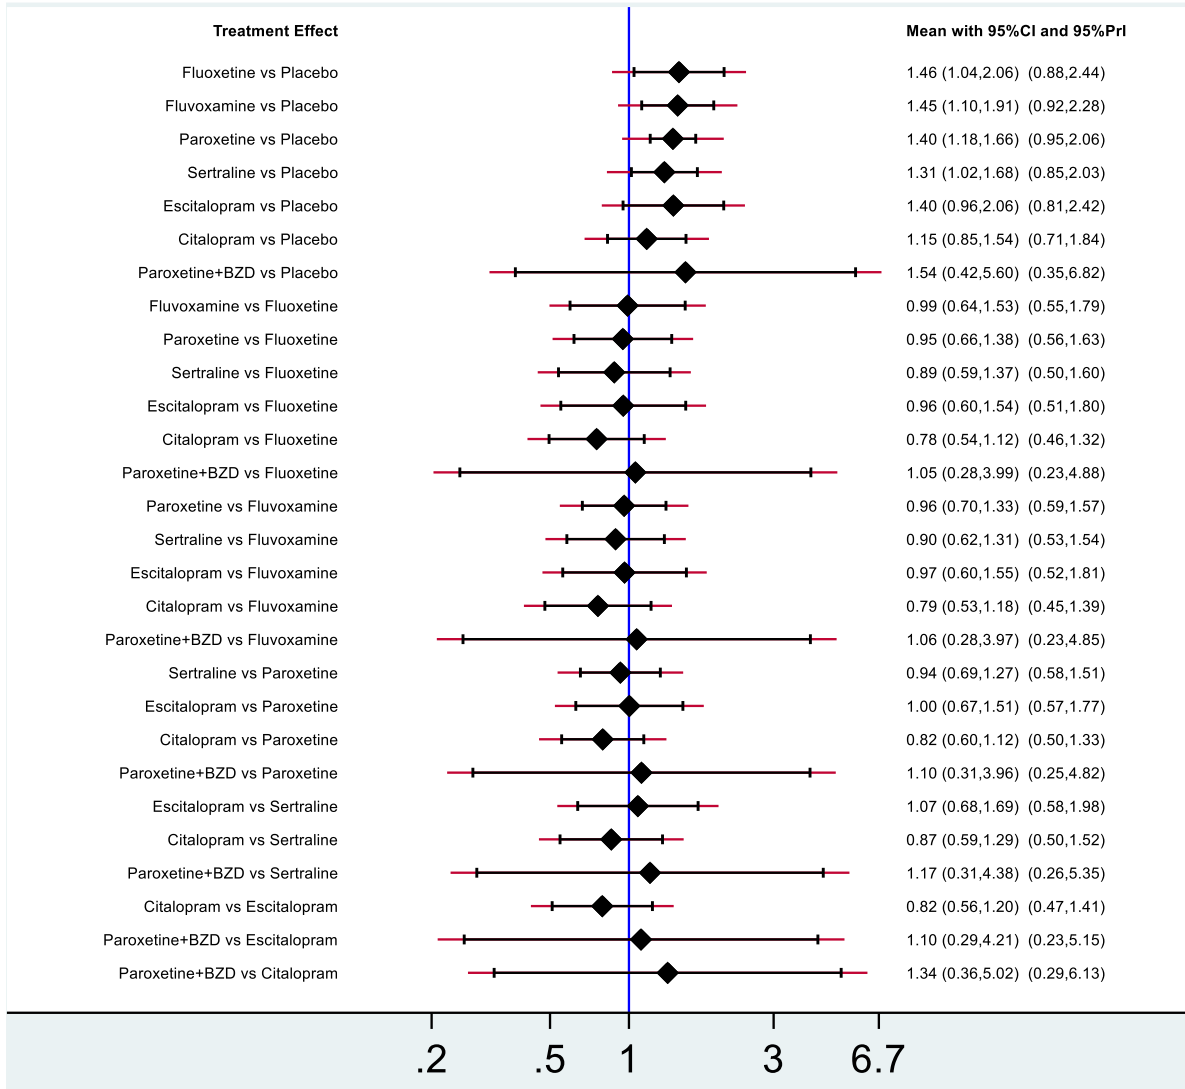

**eAppendix Figure 10.** Predictive interval plot of network meta-analysis of adverse drug events for individual SSRIs

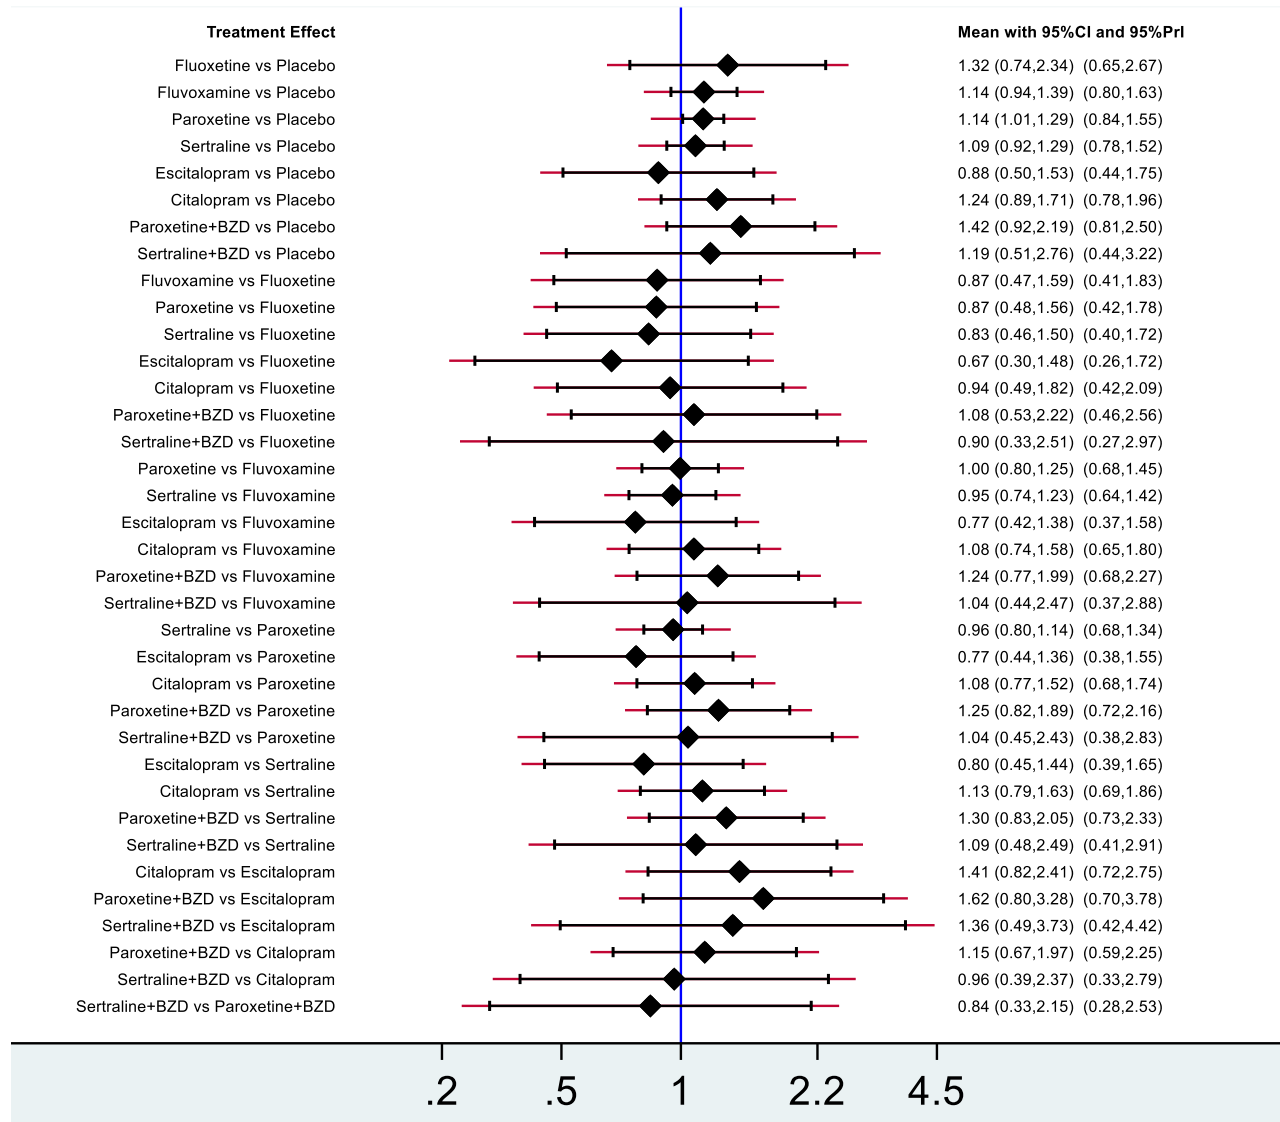

**eAppendix Figure 11.** Node splitting test of network meta-analysis of remission for drug classes

| Side    | Direct    |           | Indirect  |           | Difference |           |       |
|---------|-----------|-----------|-----------|-----------|------------|-----------|-------|
|         | Coef.     | Std. Err. | Coef.     | Std. Err. | Coef.      | Std. Err. | P> z  |
| 01 02   | .3066091  | .0642539  | .3738307  | .0948273  | -.0672216  | .1170379  | 0.566 |
| 01 03 * | .4009427  | .045897   | .3166396  | .1048867  | .0843031   | .1143463  | 0.461 |
| 01 04 * | -.1718503 | .421837   | -.4807048 | .5162151  | .3088545   | .6516806  | 0.636 |
| 01 06 * | .1861867  | .2615864  | -.0909123 | .3833323  | .277099    | .4689174  | 0.555 |
| 01 07   | .3199309  | .0487922  | .3266679  | .1033117  | -.006737   | .1131578  | 0.953 |
| 01 08 * | .2285219  | .0724533  | .3273478  | .1923296  | -.0988259  | .2108245  | 0.639 |
| 01 09   | .7738826  | .3418802  | -.2206187 | .3284754  | .9945014   | .4741077  | 0.036 |
| 02 03   | -.014377  | .0627485  | .178609   | .0838784  | -.192986   | .104733   | 0.065 |
| 02 06   | .0170062  | .30979    | -.4625609 | .2987048  | .4795671   | .4313231  | 0.266 |
| 02 07   | .068518   | .0975109  | -.0563852 | .0750093  | .1249032   | .123715   | 0.313 |
| 03 04 * | -.7108468 | .3380177  | -.4019923 | .676424   | -.3088545  | .6516806  | 0.636 |
| 03 06   | -.6576799 | .3256777  | -.0758223 | .2572023  | -.5818576  | .388643   | 0.134 |
| 03 07   | -.1281734 | .1439913  | -.0559417 | .0604406  | -.0722318  | .1561619  | 0.644 |
| 05 07 * | .0587509  | .127591   | .6401453  | 57.28854  | -.5813944  | 57.28867  | 0.992 |
| 07 08   | -.0035806 | .0897655  | -.1763945 | .1046038  | .1728138   | .1379157  | 0.210 |
| 07 09   | -.5306162 | .325647   | .4638422  | .3445718  | -.9944585  | .4741027  | 0.036 |
| 07 10 * | .0953102  | .6417394  | -.6366902 | 130.3595  | .7320003   | 130.3611  | 0.996 |

**eAppendix Figure 12.** Node splitting test of network meta-analysis of drop-out for drug classes

| Side    | Direct    |           | Indirect  |           | Difference |           |       |
|---------|-----------|-----------|-----------|-----------|------------|-----------|-------|
|         | Coef.     | Std. Err. | Coef.     | Std. Err. | Coef.      | Std. Err. | P> z  |
| 01 02   | -.3840532 | .1203571  | -.1932824 | .2048346  | -.1907708  | .2356979  | 0.418 |
| 01 03 * | -.8019813 | .1160786  | -.5181595 | .2853159  | -.2838218  | .301101   | 0.346 |
| 01 04 * | -.3631896 | .645197   | 3.343396  | 2.918264  | -3.706586  | 2.972219  | 0.212 |
| 01 05   | .5093175  | .7049695  | -.1873112 | .4192343  | .6966287   | .8204056  | 0.396 |
| 01 06   | .6732057  | .3741942  | .3073766  | .7045868  | .3658291   | .8365781  | 0.662 |
| 01 07   | -.0401522 | .0988867  | -.4011763 | .2627539  | .3610241   | .2807014  | 0.198 |
| 01 08 * | -.2470563 | .1999801  | .1423313  | .5645784  | -.3893877  | .5939622  | 0.512 |
| 01 09   | -.7467106 | .455594   | .4906681  | .6795714  | -1.237379  | .8181584  | 0.130 |
| 02 03   | -.3893006 | .1790872  | -.4820494 | .1951391  | .0927488   | .2643353  | 0.726 |
| 02 05   | 2.34e-07  | .465693   | .8002848  | .5555852  | -.8002846  | .7249438  | 0.270 |
| 02 06   | .3653211  | .443429   | 1.553485  | .4773402  | -1.188164  | .6691594  | 0.076 |
| 02 07   | .2039758  | .1842755  | .2912814  | .1692245  | -.0873056  | .249845   | 0.727 |
| 02 11 * | -.3220835 | .5622725  | .3492383  | 200.0335  | -.6713218  | 200.0333  | 0.997 |
| 03 04 * | 2.246015  | 1.498554  | -1.460571 | 1.740145  | 3.706586   | 2.972219  | 0.212 |
| 03 06   | 2.473539  | .7633601  | 1.017876  | .3817613  | 1.455663   | .8943098  | 0.104 |
| 03 07   | .7931704  | 1.260488  | .6802304  | .1410845  | .1129399   | 1.268359  | 0.929 |
| 05 07   | -.4418284 | .8635132  | -.0010456 | .4038262  | -.4407828  | .9532761  | 0.644 |
| 07 08   | -.0771509 | .3106545  | -.1552434 | .2668093  | .0780925   | .4089418  | 0.849 |
| 07 09   | .5596043  | .6731968  | -.6777556 | .4649582  | 1.23736    | .8181545  | 0.130 |
| 07 10 * | -.4795731 | .8982386  | -.3099307 | 199.9793  | -.1696424  | 199.9779  | 0.999 |
| 07 12 * | -.1167288 | .352637   | .0529095  | 141.468   | -.1696384  | 141.468   | 0.999 |

**eAppendix Figure 13.** Node splitting test of network meta-analysis of adverse drug events for drug classes

| Side    | Direct    |           | Indirect  |           | Difference |           |       |
|---------|-----------|-----------|-----------|-----------|------------|-----------|-------|
|         | Coef.     | Std. Err. | Coef.     | Std. Err. | Coef.      | Std. Err. | P> z  |
| 01 02   | .4653046  | .1324698  | .7468313  | .1594452  | -.2815267  | .2097907  | 0.180 |
| 01 03   | .6488292  | .0711593  | -.1503031 | .2177677  | .7991323   | .2314449  | 0.001 |
| 01 05 * | -.0764402 | .3867037  | -.7797858 | .5283325  | .7033456   | .6308159  | 0.265 |
| 01 06   | .1303979  | .0920063  | .3913688  | .2032337  | -.260971   | .2233296  | 0.243 |
| 01 07 * | .1856924  | .1731707  | .4506294  | .4938896  | -.2649371  | .5235252  | 0.613 |
| 01 08   | .1053605  | .2887677  | .0067437  | .3083601  | .0986169   | .4224603  | 0.815 |
| 02 03   | -.1215846 | .1269493  | .183074   | .1740997  | -.3046586  | .2133446  | 0.153 |
| 02 04   | -.2162932 | .2693582  | -.5332008 | .2946143  | .3169075   | .3991876  | 0.427 |
| 02 05   | -.7945138 | .4359444  | -.9953005 | .4330742  | .2007867   | .5767956  | 0.728 |
| 02 06   | -.2815371 | .1890743  | -.4826183 | .1465494  | .2010812   | .2392025  | 0.401 |
| 02 10 * | .0833816  | .6173676  | -1.162528 | 123.2957  | 1.245909   | 123.2973  | 0.992 |
| 03 05   | -1.352612 | .4725807  | -.5573719 | .3978467  | -.79524    | .578016   | 0.169 |
| 04 06   | .0961688  | .2681242  | -.2205329 | .2957297  | .3167018   | .3991824  | 0.428 |
| 06 07   | .0729335  | .2657192  | .0136304  | .2320625  | .0593031   | .3530177  | 0.867 |
| 06 08   | -.1648219 | .2956725  | -.0662253 | .3017762  | -.0985966  | .422461   | 0.815 |
| 06 09 * | .5136787  | .4768446  | -.4342608 | 60.947    | .9479395   | 60.95024  | 0.988 |
| 06 11 * | .1812591  | .2585754  | -.3474463 | 32.72969  | .5287054   | 32.73094  | 0.987 |

**eAppendix Figure 14.** Node splitting test of network meta-analysis of remission for individual SSRIs

| Side  | Direct    |           | Indirect  |           | Difference |           |       |
|-------|-----------|-----------|-----------|-----------|------------|-----------|-------|
|       | Coef.     | Std. Err. | Coef.     | Std. Err. | Coef.      | Std. Err. | P> z  |
| 1 2   | .4083816  | .2197744  | .3266564  | .3141324  | .0817252   | .3834069  | 0.831 |
| 1 3   | .         | .         | .         | .         | .          | .         | .     |
| 1 4   | .3480545  | .0956334  | .2204289  | .3182572  | .1276255   | .3293882  | 0.698 |
| 1 5   | .         | .         | .         | .         | .          | .         | .     |
| 1 6 * | .2898193  | .2213807  | .634108   | .5772529  | -.3442887  | .6288498  | 0.584 |
| 1 7 * | .0406891  | .2343824  | .2128334  | .2095899  | -.1721443  | .3144249  | 0.584 |
| 2 7   | -.2076386 | .2590119  | -.2893612 | .2826921  | .0817225   | .3834084  | 0.831 |
| 4 7   | -.1276365 | .2530624  | -.2552576 | .214327   | .1276211   | .3293921  | 0.698 |
| 4 8 * | .0953102  | .6538807  | -.5740372 | 199.9789  | .6693473   | 199.978   | 0.997 |
| 6 7 * | -.2491302 | .2198277  | .0951584  | .5790307  | -.3442887  | .6288498  | 0.584 |

**eAppendix Figure 15.** Node splitting test of network meta-analysis of adverse drug events for individual SSRIs

| Side  | Direct    |           | Indirect  |           | Difference |           |       |
|-------|-----------|-----------|-----------|-----------|------------|-----------|-------|
|       | Coef.     | Std. Err. | Coef.     | Std. Err. | Coef.      | Std. Err. | P> z  |
| 1 2   | .         | .         | .         | .         | .          | .         | .     |
| 1 3   | .         | .         | .         | .         | .          | .         | .     |
| 1 4   | .1185611  | .0753261  | .2104908  | .1751237  | -.0919297  | .1911992  | 0.631 |
| 1 5   | .0972994  | .1246468  | .0707496  | .1562154  | .0265498   | .2008756  | 0.895 |
| 1 6 * | .0324537  | .3231439  | -.7433646 | .6337577  | .7758183   | .7183316  | 0.280 |
| 1 7 * | .291436   | .1922509  | -.0414147 | .3416185  | .3328506   | .3919102  | 0.396 |
| 4 5   | -.0593906 | .1381571  | -.032842  | .1444301  | -.0265486  | .2008751  | 0.895 |
| 4 7   | -.163971  | .3358989  | .1688776  | .2019042  | -.3328486  | .3919097  | 0.396 |
| 4 8 * | .2204733  | .2127626  | -.0406354 | 199.1334  | .2611087   | 199.1334  | 0.999 |
| 5 9 * | .0870114  | .4220321  | -.0836537 | 200.1376  | .170665    | 200.1372  | 0.999 |
| 6 7 * | .4444703  | .2887025  | -.331348  | .6818116  | .7758183   | .7183314  | 0.280 |



**eAppendix Table 1.** Transitivity assessment for network meta-analysis of drug classes

| Comparison             | No of studies | Diagnostic criteria                    | Duration of treatment | No. of participants | %Female | Mean age (years) | Duration of panic disorder (years) | %Agoraphobia |
|------------------------|---------------|----------------------------------------|-----------------------|---------------------|---------|------------------|------------------------------------|--------------|
| <i>Remission</i>       |               |                                        |                       |                     |         |                  |                                    |              |
| TCA vs placebo         | 1             | DSM-III-R                              | 12                    | 56                  | -       | -                | -                                  | -            |
| BZD vs placebo         | 10            | DSM-III (5), DSM-III-R (4), DSM-IV (1) | 4 – 15                | 2020                | 65.36   | 36.46            | 8.57                               | 77.54        |
| SSRI vs placebo        | 12            | DSM-III-R (9), DSM-IV (3)              | 6 – 12                | 2270                | 61.99   | 37.31            | 8.34                               | 74.03        |
| SNRI vs placebo        | 2             | DSM-IV (2)                             | 10                    | 680                 | 59.01   | 37.76            | 7.18                               | -            |
| NRI vs placebo         | 1             | DSM-III-R                              | 8                     | 75                  | 67      | 35.8             | 1.8                                | -            |
| TCA vs BZD             | 1             | DSM-III-R                              | 12                    | 257                 | 64      | 34.8             | -                                  | -            |
| TCA vs SSRI            | 2             | DSM-III-R (1), DSM-IV (1)              | 10-24                 | 59                  | 45.58   | 37.06            | 5.6                                | 55           |
| BZD vs SSRI            | 1             | DSM-IV (1)                             | 8                     | 120                 | 69      | 34.9             | -                                  | 93           |
| MAOI vs SSRI           | 1             | DSM-III (1)                            | 8                     | 366                 | 67      | 35.0             | 6                                  | -            |
| SSRI vs NRI            | 1             | DSM-IV                                 | 12.8                  | 68                  | 68      | 30.8             | -                                  | -            |
| SSRI vs SSRI plus BZD  | 1             | DSM-IV                                 | 8                     | 60                  | 60      | -                | -                                  | 83           |
| TCA vs SSRI vs placebo | 4             | DSM-III-R (4)                          | 8-12                  | 1083                | 57.27   | 34.87            | 7.59                               | 75.77        |
| TCA vs BZD vs placebo  | 5             | DSM-III (5)                            | 8                     | 1511                | 61.32   | 34.16            | 7.06                               | 40.52        |

|                                |    |                                        |        |      |       |       |       |       |
|--------------------------------|----|----------------------------------------|--------|------|-------|-------|-------|-------|
| TCA vs buspirone vs placebo    | 2  | DSM-III (2)                            | 8      | 106  | 64.64 | 32.80 | 11.10 | -     |
| SSRI vs SNRI vs placebo        | 2  | DSM-IV (2)                             | 12     | 1113 | 75.79 | 36.75 | 3.39  | -     |
| BZD vs beta-blocker vs placebo | 1  | DSM-III (1)                            | 5      | 55   | 69    | 31.0  | 6.4   | 25    |
| BZD vs buspirone vs placebo    | 1  | DSM-III-R (1)                          | 8      | 92   | 80    | 36.7  | 15.2  | 17    |
| SSRI vs SSRI vs placebo        | 1  | DSM-IV (1)                             | 10     | 351  | 58    | 37.7  | -     | -     |
| <i>Drop-out</i>                |    |                                        |        |      |       |       |       |       |
| TCA vs placebo                 | 5  | DSM-III (1), DSM-III-R (4)             | 8-12   | 431  | 54.43 | 34.71 | 7.90  | 97.27 |
| BZD vs placebo                 | 14 | DSM-III (8), DSM-III-R (5), DSM-IV (1) | 4 – 15 | 2770 | 53.58 | 36.23 | 8.63  | 59.77 |
| SSRI vs placebo                | 12 | DSM-III-R (10), DSM-IV (2)             | 8-14   | 2309 | 62.35 | 37.53 | 8.42  | 44.2  |
| SNRI vs placebo                | 3  | DSM-III-R (2), DSM-IV (1)              | 8-10   | 705  | 57.63 | 37.72 | 7.18  | -     |
| NRI vs placebo                 | 1  | DSM-III-R (1)                          | 8      | 75   | 67    | 35.8  | 1.8   | -     |
| MAOI vs placebo                | 2  | DSM-III-R (2)                          | 8-12   | 57   | 90    | 32    | 9.6   | 98.42 |
| TCA vs BZD                     | 1  | DSM-III-R (2)                          | 12-24  | 572  | 63.45 | 35.57 | -     | -     |
| BZD vs buspirone               | 1  | DSM-III (1)                            | 4      | 16   | 69    | 35    | -     | -     |
| BZD vs SSRI                    | 1  | DSM-IV (1)                             | 8      | 120  | 69    | 34.9  | -     | 93    |
| MAOI vs SSRI                   | 1  | DSM-III-R (1)                          | 16     | 32   | -     | -     | -     | -     |

|                                |   |                              |        |      |       |       |      |       |
|--------------------------------|---|------------------------------|--------|------|-------|-------|------|-------|
| SSRI vs NRI                    | 1 | DSM-IV (1)                   | 12.8   | 68   | 68    | 30.8  | -    | 66    |
| SSRI vs SSRI plus BZD          | 2 | DSM-IV (2)                   | 8 – 12 | 107  | 57.8  | 38.2  | 6.8  | 82.12 |
| TCA vs SSRI vs placebo         | 7 | DSM-III-R (5),<br>DSM-IV (2) | 8-26   | 1363 | 59.23 | 36.31 | 7.35 | 46.41 |
| TCA vs BZD vs placebo          | 7 | DSM-III (5), DSM-III-R (1)   | 8-16   | 1662 | 62.59 | 34.52 | 7.06 | 45.10 |
| TCA vs buspirone vs placebo    | 3 | DSM-III (3)                  | 8      | 197  | 65.73 | 32.75 | 11.1 | -     |
| TCA plus BZD vs TCA            | 1 | DSM-III-R (1)                | 8      | 135  | 59    | 35.5  | 5.7  | -     |
| SSRI vs SNRI vs placebo        | 2 | DSM-IV (2)                   | 12     | 1113 | 75.79 | 36.75 | 3.39 | -     |
| BZD vs beta-blocker vs placebo | 1 | DSM-III (1)                  | 5      | 55   | 69    | 31    | 6.4  | 25    |
| BZD vs buspirone vs placebo    | 1 | DSM-III-R (1)                | 8      | 92   | 80    | 36.7  | 15.2 | 17    |
| SSRI vs SSRI vs placebo        | 1 | DSM-IV (1)                   | 10     | 351  | 58    | 37.7  | -    | -     |
| NaSSA vs SSRI                  | 1 | DSM-IV (1)                   | 8      | 27   | 77    | 36.2  | 3    | 73    |
| TCA vs MAOI                    | 1 | DSM-III-R (1)                | 8      | 135  | 59    | 35.5  | 5.7  | -     |
| <i>Adverse drug events</i>     |   |                              |        |      |       |       |      |       |

|                         |    |                                        |          |      |       |       |      |       |
|-------------------------|----|----------------------------------------|----------|------|-------|-------|------|-------|
| BZD vs placebo          | 12 | DSM-III (6), DSM-III-R (5), DSM-IV (1) | 4-9      | 2237 | 49.89 | 35.96 | 8.44 | 77.41 |
| SSRI vs placebo         | 7  | DSM-III-R (6), DSM-IV (1)              | 6-12     | 1703 | 60.58 | 37.16 | 8.55 | 71.85 |
| SNRI vs placebo         | 3  | DSM-III-R (1), DSM-IV (2)              | 8-10     | 705  | 57.63 | 37.72 | 7.18 | -     |
| NRI vs placebo          | 1  | DSM-III-R (1)                          | 8        | 75   | 67    | 35.8  | 1.8  | -     |
| TCA vs BZD              | 1  | DSM-III-R (2)                          | 12-24    | 572  | 63.45 | 35.57 | -    | -     |
| TCA vs MAOI             | 1  | DSM-III-R (1)                          | 8        | 135  | 59    | 35.5  | 5.7  | -     |
| TCA vs SSRI             | 1  | DSM-IV (1)                             | 26       | 207  | 74    | 40.3  | 7.4  | 60    |
| TCA vs TCA plus BZD     | 1  | DSM-III-R (1)                          | 4        | 48   | 54    | 36.2  | 10   | 69    |
| MAOI vs SSRI            | 1  | DSM-III (1)                            | 8        | 366  | 67    | 35    | 6    | -     |
| SSRI vs NRI             | 2  | DSM-III (1), DSM-IV (1)                | 8 – 12.8 | 85   | 66    | 31.74 | -    | 66    |
| SSRI vs SSRI plus BZD   | 2  | DSM-IV (2)                             | 8 – 12   | 107  | 57.8  | 38.2  | 6.8  | 82.12 |
| TCA vs BZD vs placebo   | 3  | DSM-III (3)                            | 8        | 1351 | 60.83 | 34.13 | 8    | 37.93 |
| TCA vs SSRI vs placebo  | 2  | DSM-III-R (2)                          | 8        | 183  | 53.28 | 34.46 | 7.9  | 50.63 |
| SSRI vs SNRI vs placebo | 2  | DSM-IV (2)                             | 12       | 1113 | 75.79 | 36.75 | 3.39 | -     |
| TCA plus BZD vs TCA     | 1  | DSM-III-R (1)                          | 4        | 48   | 54    | 36.2  | 10   | 69    |

|                             |   |           |   |    |    |      |      |    |
|-----------------------------|---|-----------|---|----|----|------|------|----|
| TCA vs buspirone vs placebo | 1 | DSM-III   | 8 | 52 | 57 | 30.3 | -    | -  |
| BZD vs buspirone vs placebo | 1 | DSM-III-R | 8 | 92 | 80 | 36.7 | 15.2 | 17 |
| SSRI vs NaSSA               | 1 | DSM-III-R | 8 | 75 | 67 | 35.8 | 1.8  | -  |

BZDs, benzodiazepines; DSM, Diagnostic and Statistical Manual of Mental Disorders; MAOIs, monoamine oxidase inhibitors; NaSSA, noradrenergic and specific serotonergic antidepressants NRI, norepinephrine reuptake inhibitors; SSRI, selective serotonin reuptake inhibitors; SNRI, serotonin–norepinephrine reuptake inhibitors; TCAs, tricyclic anti-depressants

**eAppendix Table 2.** Transitivity assessment for network meta-analysis of individual SSRIs

| Comparison                              | No of studies | Diagnostic criteria          | Duration of treatment | No. of participants | %Female | Mean age is (years) | Duration of panic disorder (years) | %Agoraphobia |
|-----------------------------------------|---------------|------------------------------|-----------------------|---------------------|---------|---------------------|------------------------------------|--------------|
| <b>Remission</b>                        |               |                              |                       |                     |         |                     |                                    |              |
| Fluvoxamine vs placebo                  | 5             | DSM-III-R (5)                | 6-8                   | 392                 | 62.93   | 35.48               | 4.7                                | 66.9         |
| Fluoxetine vs placebo                   | 2             | DSM-III-R (1),<br>DSM-IV ( ) | 10-12                 | 333                 | 65.22   | 36.8                | -                                  | 78           |
| Paroxetine vs placebo                   | 7             | DSM-III-R (3),<br>DSM-IV (4) | 9-12                  | 1961                | 63.87   | 37.09               | 6.85                               | 80.4         |
| Sertraline vs placebo                   | 3             | DSM-III-R (3)                | 10-12                 | 521                 | 56.31   | 37.57               | 9.46                               | 70           |
| Escitalopram vs citalopram vs placebo   | 1             | DSM-IV (1)                   | 10                    | 351                 | 59      | 37.7                | -                                  | -            |
| Paroxetine vs citalopram                | 2             | DSM-IV (2)                   | 8-52                  | 152                 | 67.63   | 34                  | 4.2                                | 71           |
| Paroxetine+clonazepam vs paroxetine     | 1             | DSM-IV (1)                   | 8                     | 42                  | 60      | -                   | -                                  | 83           |
| Fluoxetine vs citalopram                | 1             | DSM-IV (1)                   | 24                    | 42                  | 60      | 37                  | 5.8                                | 69           |
| <b>Adverse drug events</b>              |               |                              |                       |                     |         |                     |                                    |              |
| Fluvoxamine vs placebo                  | 5             | DSM-III-R (5)                | 6-8                   | 378                 | 61.6    | 35.09               | 5.3                                | 61.7         |
| Fluoxetine vs placebo                   | 1             | DSM-III-R (1)                | 10                    | 153                 | 69      | 36.8                | -                                  | 78.0         |
| Paroxetine vs placebo                   | 6             | DSM-III-R (3),<br>DSM-IV (3) | 10-12                 | 2014                | 64.18   | 37.07               | 7.4                                | 77.5         |
| Sertraline vs placebo                   | 3             | DSM-III-R (3)                | 10-12                 | 521                 | 56.31   | 37.57               | 9.5                                | 70.0         |
| Escitalopram vs citalopram vs placebo   | 1             | DSM-IV (1)                   | 10                    | 351                 | 59      | 37.7                | -                                  | -            |
| Paroxetine vs citalopram                | 1             | DSM-IV (1)                   | 8                     | 52                  | 65      | 31.3                | -                                  | 79.0         |
| Paroxetine and clonazepam vs paroxetine | 1             | DSM-IV (1)                   | 8                     | 42                  | 60      | -                   | -                                  | 83.0         |
| Sertraline and clonazepam vs sertraline | 1             | DSM-IV (1)                   | 12                    | 47                  | 55      | 38.2                | 6.8                                | 81.0         |
| Paroxetine vs sertraline                | 2             | DSM-IV (1),<br>ICD-10 (1)    | 12                    | 544                 | 67.1    | 38.9                | 3.9                                | 65.0         |
| Citalopram vs placebo                   | 1             | DSM-III-R (1)                | 8                     | 193                 | 79      | -                   | -                                  | 75.0         |

### **eAppendix 3: Network meta-analysis of individual selective serotonin reuptake inhibitors**

#### ***Remission rate***

Twenty-two studies with 8 interventions (i.e., fluoxetine, fluvoxamine, paroxetine, sertraline, escitalopram, citalopram, paroxetine plus benzodiazepine (BZD), and placebo) were included in the network meta-analysis (NMA) of remission (eAppendix Figure 16 and eAppendix Table 3). Global test indicated the consistency results (Global Chi-square = 0.28, p-value=0.8715). Fluoxetine, fluvoxamine, paroxetine, and sertraline significantly increased remission rate, when compared to placebo with risk ratios (RR) of 1.46 (95% CI: 1.04,2.06), 1.45 (95% CI: 1.10,1.91), 1.40 (95% CI: 1.18,1.66), and 1.31 (95% CI: 1.02,1.68), respectively (eAppendix Table 4).

SUCRA suggested fluoxetine (68.4%), fluvoxamine (65.4%), and escitalopram (62.7%) as the top three best SSRIs for remission (eAppendix Figure 17). The comparison-adjusted funnel plot was symmetry, indicating no publication bias (eAppendix Figure 18).

**eAppendix Figure 16.** Network map of disease remission for individual selective serotonin reuptake inhibitors

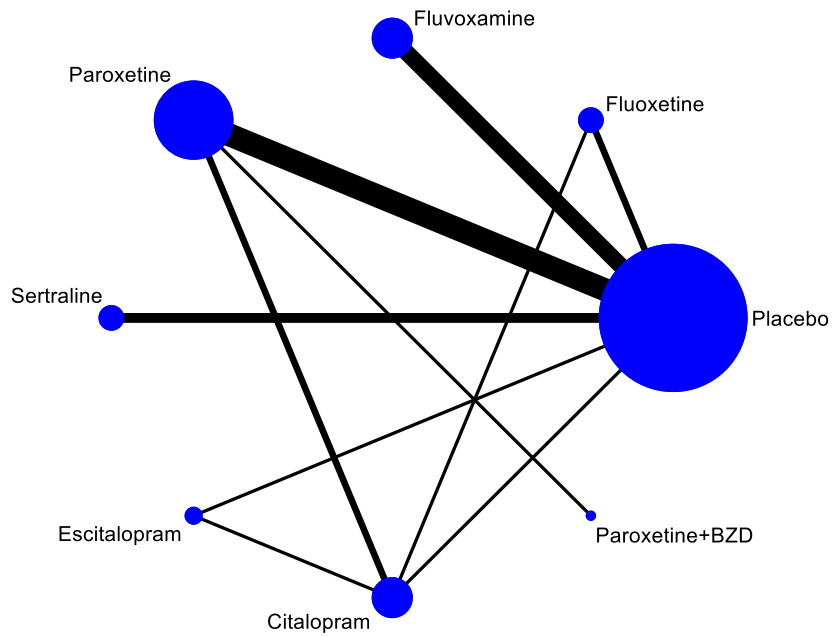

The size of each node represents the number of participants randomly assigned to the treatment comparison. The width of each line represents the number of studies comparing the two connected treatments. The number provided over each line indicates the number of studies comparing the two connected treatments



**eAppendix Table 3.** Data used for pooling disease remission for individual SSRIs

| Author      | Year | Duration of treatment (weeks) | Intervention   | Remission | Non- remission |
|-------------|------|-------------------------------|----------------|-----------|----------------|
| Black       | 1993 | 8                             | Fluvoxamine    | 18        | 7              |
|             |      |                               | Placebo        | 6         | 19             |
| Hoehn-Saric | 1993 | 8                             | Fluvoxamine    | 11        | 7              |
|             |      |                               | Placebo        | 4         | 14             |
| Sandmann    | 1998 | 6                             | Fluvoxamine    | 8         | 9              |
|             |      |                               | Placebo        | 6         | 12             |
| Asnis       | 2001 | 8                             | Fluvoxamine    | 60        | 27             |
|             |      |                               | Placebo        | 42        | 50             |
| Londborg    | 1998 | 12                            | Sertraline     | 72        | 55             |
|             |      |                               | Placebo        | 18        | 26             |
| Pohl        | 1998 | 10                            | Sertraline     | 49        | 30             |
|             |      |                               | Placebo        | 40        | 47             |
| Pollack     | 1998 | 10                            | Sertraline     | 50        | 38             |
|             |      |                               | Placebo        | 41        | 47             |
| Michelson   | 1998 | 10                            | Fluoxetine     | 18        | 62             |
|             |      |                               | Placebo        | 11        | 61             |
| Michelson   | 2001 | 12                            | Fluoxetine     | 38        | 52             |
|             |      |                               | Placebo        | 25        | 65             |
| Oehrberg    | 1995 | 12                            | Paroxetine     | 19        | 41             |
|             |      |                               | Placebo        | 8         | 52             |
| Sheehan     | 2005 | 10                            | Paroxetine     | 236       | 141            |
|             |      |                               | Placebo        | 208       | 187            |
| Bergink     | 2005 | 9                             | Paroxetine     | 3         | 6              |
|             |      |                               | Placebo        | 5         | 5              |
| Stahl       | 2003 | 10                            | Escitalopram   | 63        | 62             |
|             |      |                               | Placebo        | 43        | 71             |
| Nair        | 1996 | 8                             | Fluvoxamine    | 19        | 31             |
|             |      |                               | Placebo        | 24        | 26             |
| Bakker      | 1999 | 12                            | Paroxetine     | 21        | 11             |
|             |      |                               | Placebo        | 11        | 21             |
| Lecrubier   | 1997 | 12                            | Paroxetine     | 56        | 67             |
|             |      |                               | Placebo        | 37        | 86             |
| Pollack     | 2007 | 12                            | Paroxetine     | 98        | 63             |
|             |      |                               | Placebo        | 55        | 101            |
| Pollack     | 2007 | 12                            | Paroxetine     | 88        | 63             |
|             |      |                               | Placebo        | 75        | 82             |
| Pollack     | 2003 | 8                             | Paroxetine+BZD | 4         | 16             |

| <b>Author</b> | <b>Year</b> | <b>Duration of treatment (weeks)</b> | <b>Intervention</b> | <b>Remission</b> | <b>Non- remission</b> |
|---------------|-------------|--------------------------------------|---------------------|------------------|-----------------------|
|               |             |                                      | Paroxetine          | 4                | 18                    |
| Amore         | 1999        | 24                                   | Fluoxetine          | 16               | 4                     |
|               |             |                                      | Citalopram          | 13               | 7                     |
| Marchesi      | 2006        | 52                                   | Paroxetine          | 16               | 21                    |
|               |             |                                      | Citalopram          | 17               | 1                     |
| Perna         | 2001        | 8                                    | Paroxetine          | 10               | 10                    |
|               |             |                                      | Citalopram          | 6                | 19                    |

**eAppendix Table 4.** Estimation of the relative treatment effects (95% confidence intervals) on disease remission for individual selective serotonin reuptake inhibitors

|                |                       |                   |                     |                         |                         |                         |                         |
|----------------|-----------------------|-------------------|---------------------|-------------------------|-------------------------|-------------------------|-------------------------|
| <b>Placebo</b> | 1.54 (0.42,5.60)      | 1.15 (0.85,1.54)  | 1.40 (0.96,2.06)    | <b>1.31 (1.02,1.68)</b> | <b>1.40 (1.18,1.66)</b> | <b>1.45 (1.10,1.91)</b> | <b>1.46 (1.04,2.06)</b> |
|                | <b>Paroxetine+BZD</b> | 0.74 (0.20,2.79)  | 0.91 (0.24,3.50)    | 0.85 (0.23,3.18)        | 0.91 (0.25,3.27)        | 0.94 (0.25,3.53)        | 0.95 (0.25,3.62)        |
|                |                       | <b>Citalopram</b> | 1.22 (0.84,1.79)    | 1.14 (0.77,1.69)        | 1.22 (0.89,1.67)        | 1.27 (0.85,1.89)        | <b>1.28 (0.89,1.84)</b> |
|                |                       |                   | <b>Escitalopram</b> | 0.93 (0.59,1.48)        | 1.00 (0.66,1.50)        | 1.03 (0.65,1.65)        | 1.04 (0.65,1.68)        |
|                |                       |                   |                     | <b>Sertraline</b>       | 1.07 (0.79,1.45)        | 1.11 (0.76,1.60)        | 1.12 (0.73,1.71)        |
|                |                       |                   |                     |                         | <b>Paroxetine</b>       | 1.04 (0.75,1.42)        | 1.05 (0.72,1.52)        |
|                |                       |                   |                     |                         |                         | <b>Fluvoxamine</b>      | 1.01 (0.65,1.56)        |
|                |                       |                   |                     |                         |                         |                         | <b>Fluoxetine</b>       |

Results are risk ratios (95% confidence intervals) between each pair of treatments from network meta-analysis. Comparisons are read from right to left. Bold font indicates statistical significance. The GRADE certainty of evidence of each comparison is highlighted: Light green, light red, and dark red refer to moderate, low, and very low certainty.

**eAppendix Figure 17.** Surface under the cumulative ranking curve of remission for individual selective serotonin reuptake inhibitors

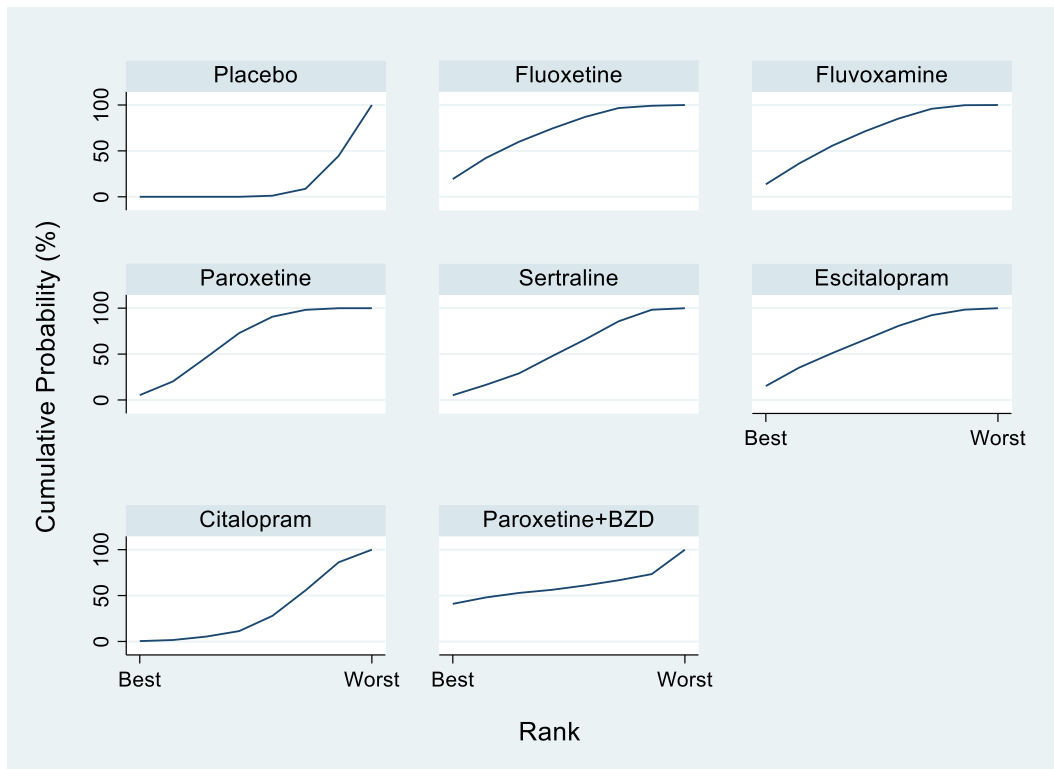

| Treatment      | SUCRA | PrBest | MeanRank |
|----------------|-------|--------|----------|
| Placebo        | 7.8   | 0.0    | 7.5      |
| Fluoxetine     | 68.4  | 19.3   | 3.2      |
| Fluvoxamine    | 65.4  | 13.6   | 3.4      |
| Paroxetine     | 61.9  | 5.3    | 3.7      |
| Sertraline     | 49.8  | 5.2    | 4.5      |
| Escitalopram   | 62.7  | 15.2   | 3.6      |
| Citalopram     | 26.9  | 0.4    | 6.1      |
| paroxetine+BZD | 57.1  | 41.0   | 4.0      |

**eAppendix Figure 18.** Comparison-adjusted funnel plot of remission for individual selective serotonin reuptake inhibitors

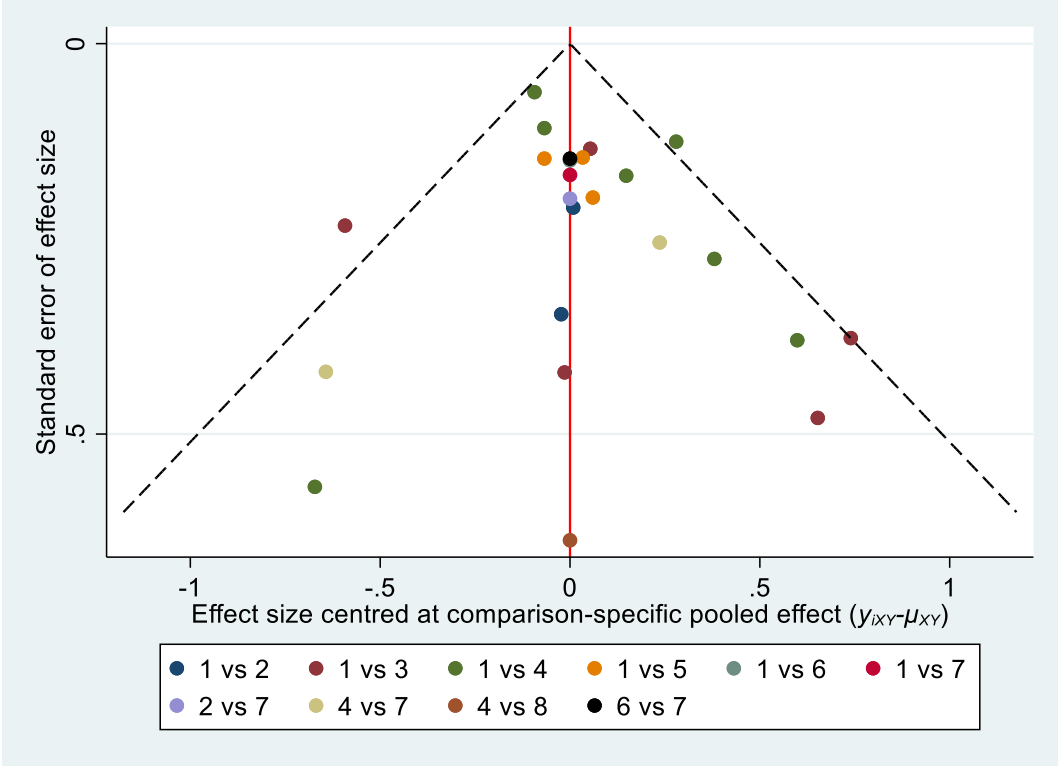

### *Adverse events*

Twenty-two studies with 9 interventions (i.e., fluoxetine, fluvoxamine, paroxetine, sertraline, escitalopram, citalopram, paroxetine plus benzodiazepine (BZD), sertraline plus BZD, and placebo) were considered in NMA of adverse events (eAppendix Figure 19 and eAppendix Table 5). Findings from global test showed inconsistency results (Global Chi-square = 1.3, p-value=0.7292). Only paroxetine had significantly higher risk of adverse events than placebo with RR of 1.14 (95% CI: 1.01,1.29), see eAppendix Table 6. Risk of adverse events in escitalopram group was lower than risk in placebo group but this difference did not reach statistical significance (RR = 0.88; 95% CI: 0.50,1.53).

SUCRA indicated that escitalopram (80.9%) had the highest chance of being the best treatment with lower risk of adverse events, followed by sertraline (58.5%), see eAppendix Figure 20. The comparison-adjusted funnel plot was asymmetry, suggesting possible publication bias for this outcome (eAppendix Figure 21).

**eAppendix Figure 19.** Network map of adverse events for individual selective serotonin reuptake inhibitors

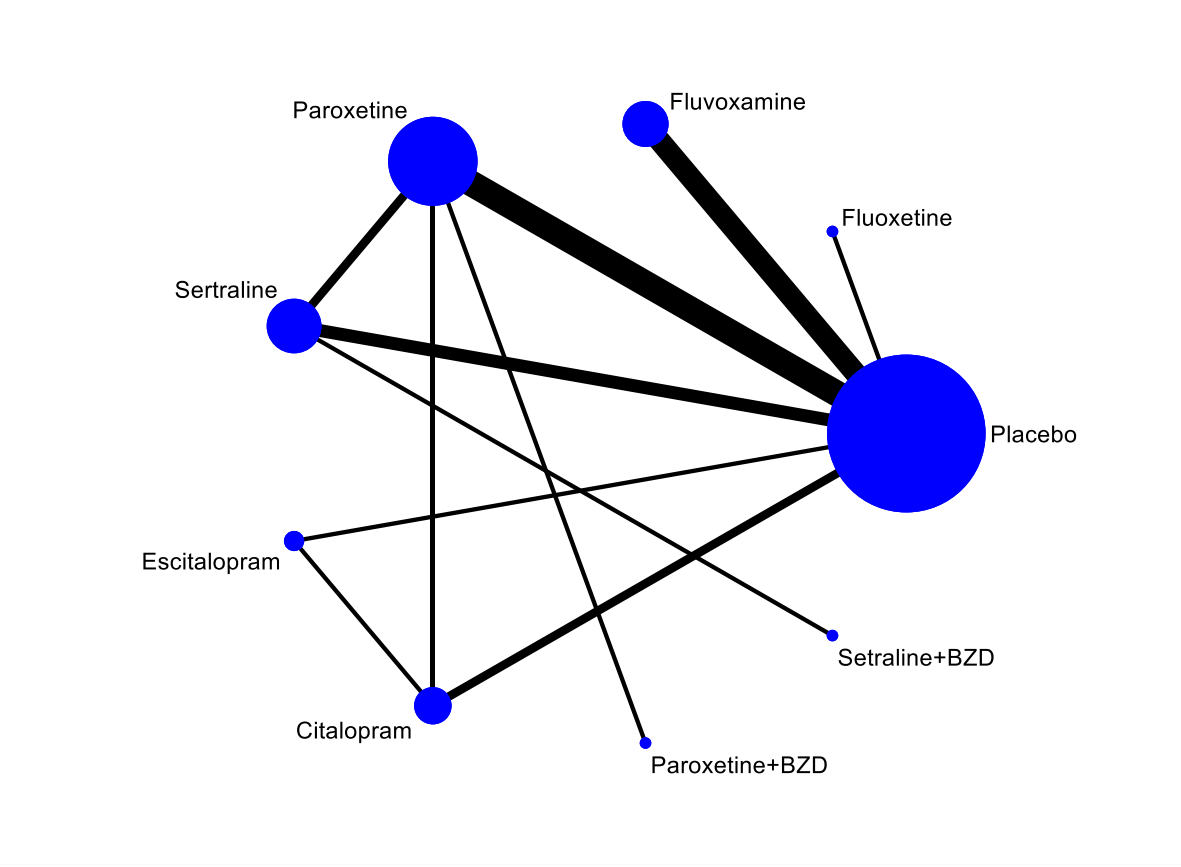

The size of each node represents the number of participants randomly assigned to the treatment comparison. The width of each line represents the number of studies comparing the two connected treatments. The number provided over each line indicates the number of studies comparing the two connected treatments

**eAppendix Table 5.** Data used for pooling adverse drug events for individual SSRIs

| Author                     | Year | Most common reported Adverse events | Intervention     | Adverse events | No adverse events |
|----------------------------|------|-------------------------------------|------------------|----------------|-------------------|
| <b>SSRIs vs placebo</b>    |      |                                     |                  |                |                   |
| Hoehn-Saric                | 1993 | Sedation                            | Fluvoxamine      | 5              | 13                |
|                            |      | Dry mouth                           | Placebo          | 3              | 15                |
| Sandmann                   | 1998 | Nausea                              | Fluvoxamine      | 9              | 14                |
|                            |      | Nausea                              | Placebo          | 6              | 17                |
| Asnis                      | 2001 | Nausea                              | Fluvoxamine      | 84             | 9                 |
|                            |      | Nausea                              | Placebo          | 70             | 25                |
| Oehrberg                   | 1995 | Nausea                              | Paroxetine       | 46             | 9                 |
|                            |      | Nausea                              | Placebo          | 33             | 19                |
| Ballenger                  | 1998 | Headache                            | Paroxetine       | 19             | 48                |
|                            |      | Headache                            | Placebo          | 30             | 39                |
| Sheehan                    | 2005 | Abnormal ejaculation                | Paroxetine       | 120            | 324               |
|                            |      | Nausea                              | Placebo          | 76             | 369               |
| Londborg                   | 1998 | Nausea                              | Sertraline       | 42             | 85                |
|                            |      | Headache                            | Placebo          | 18             | 26                |
| Pohl                       | 1998 | Nausea                              | Sertraline       | 26             | 54                |
|                            |      | Nausea                              | Placebo          | 15             | 73                |
| Pollack                    | 1998 | Insomnia                            | Sertraline       | 83             | 5                 |
|                            |      | Headache                            | Placebo          | 77             | 11                |
| Michelson                  | 2001 | Not reported                        | Fluoxetine       | 25             | 65                |
|                            |      | Not reported                        | Placebo          | 19             | 71                |
| <b>TCAs vs SSRIs</b>       |      |                                     |                  |                |                   |
| Nair                       | 1996 | Nausea                              | Fluvoxamine      | 45             | 5                 |
|                            |      | Headache                            | Placebo          | 45             | 5                 |
| Bakish                     | 1996 | Dry mouth                           | Fluvoxamine      | 5              | 13                |
|                            |      | -                                   | Placebo          | 2              | 16                |
| Wade                       | 1997 | Headache                            | Citalopram       | 32             | 65                |
|                            |      | Headache                            | Placebo          | 27             | 69                |
| Lecrubier                  | 1997 | Sweating                            | Paroxetine       | 90             | 33                |
|                            |      | Headache                            | Placebo          | 83             | 40                |
| <b>SNRIs vs SSRIs</b>      |      |                                     |                  |                |                   |
| Pollack                    | 2007 | Not reported                        | Paroxetine       | 129            | 32                |
|                            |      | Not reported                        | Placebo          | 129            | 33                |
| Pollack                    | 2007 | Sedation                            | Paroxetine       | 121            | 40                |
|                            |      | Sweating                            | Placebo          | 105            | 51                |
| <b>SSRIs+BZDs vs SSRIs</b> |      |                                     |                  |                |                   |
| Goddard                    | 2001 | Sexual dysfunction                  | Sertraline + BZD | 8              | 14                |



| <b>Author</b>     | <b>Year</b> | <b>Most common reported Adverse events</b> | <b>Intervention</b> | <b>Adverse events</b> | <b>No adverse events</b> |
|-------------------|-------------|--------------------------------------------|---------------------|-----------------------|--------------------------|
|                   |             | Sexual dysfunction                         | Sertraline          | 8                     | 16                       |
| Pollack           | 2003        | Sedation                                   | Paroxetine + BZD    | 34                    | 4                        |
|                   |             | GI                                         | Paroxetine          | 15                    | 7                        |
| Bandelow          | 2004        | Headache                                   | Paroxetine          | 29                    | 84                       |
|                   |             | Nausea                                     | Sertraline          | 24                    | 88                       |
| Perna             | 2001        | Sexual dysfunction                         | Paroxetine          | 12                    | 13                       |
|                   |             | Sexual dysfunction                         | Citalopram          | 11                    | 16                       |
| Stahl             | 2003        | Headache                                   | Escitalopram        | 20                    | 108                      |
|                   |             | Headache                                   | Citalopram          | 29                    | 90                       |
|                   |             | Headache                                   | Placebo             | 18                    | 101                      |
| Clinicaltrial.gov |             | Nausea                                     | Paroxetine          | 134                   | 28                       |
|                   |             | Dizziness                                  | Sertraline          | 127                   | 30                       |

**eAppendix Table 6.** Estimation of the relative treatment effects (95% confidence intervals) on adverse events for individual selective serotonin reuptake inhibitors

|                |                       |                       |                   |                     |                   |                         |                    |                   |
|----------------|-----------------------|-----------------------|-------------------|---------------------|-------------------|-------------------------|--------------------|-------------------|
| <b>Placebo</b> | 1.19 (0.51,2.76)      | 1.42 (0.92,2.19)      | 1.24 (0.89,1.71)  | 0.88 (0.50,1.53)    | 1.09 (0.92,1.29)  | <b>1.14 (1.01,1.29)</b> | 1.14 (0.94,1.39)   | 1.32 (0.74,2.34)  |
|                | <b>Sertraline+BZD</b> | 1.20 (0.47,3.07)      | 1.04 (0.42,2.57)  | 0.74 (0.27,2.03)    | 0.92 (0.40,2.10)  | 0.96 (0.41,2.23)        | 0.96 (0.41,2.29)   | 1.11 (0.40,3.07)  |
|                |                       | <b>Paroxetine+BZD</b> | 0.87 (0.51,1.49)  | 0.62 (0.30,1.25)    | 0.77 (0.49,1.20)  | 0.80 (0.53,1.22)        | 0.81 (0.50,1.29)   | 0.93 (0.45,1.90)  |
|                |                       |                       | <b>Citalopram</b> | 0.71 (0.42,1.21)    | 0.88 (0.61,1.27)  | 0.92 (0.66,1.29)        | 0.93 (0.63,1.35)   | 1.07 (0.55,2.06)  |
|                |                       |                       |                   | <b>Escitalopram</b> | 1.24 (0.69,2.22)  | 1.30 (0.74,2.29)        | 1.31 (0.72,2.36)   | 1.50 (0.67,3.34)  |
|                |                       |                       |                   |                     | <b>Sertraline</b> | 1.05 (0.88,1.24)        | 1.05 (0.81,1.36)   | 1.21 (0.66,2.20)  |
|                |                       |                       |                   |                     |                   | <b>Paroxetine</b>       | 1.00 (0.80,1.26)   | 1.15 (0.64,2.07)  |
|                |                       |                       |                   |                     |                   |                         | <b>Fluvoxamine</b> | 1.15 (0.63,2.11)  |
|                |                       |                       |                   |                     |                   |                         |                    | <b>Fluoxetine</b> |

Results are risk ratios (95% confidence intervals) between each pair of treatments from network meta-analysis. Comparisons are read from right to left. Bold font indicates statistical significance. The GRADE certainty of evidence of each comparison is highlighted: Light green and light red refer to moderate and low certainty.

**eAppendix Figure 20.** Surface under the cumulative ranking curve of adverse events for individual selective serotonin reuptake inhibitors

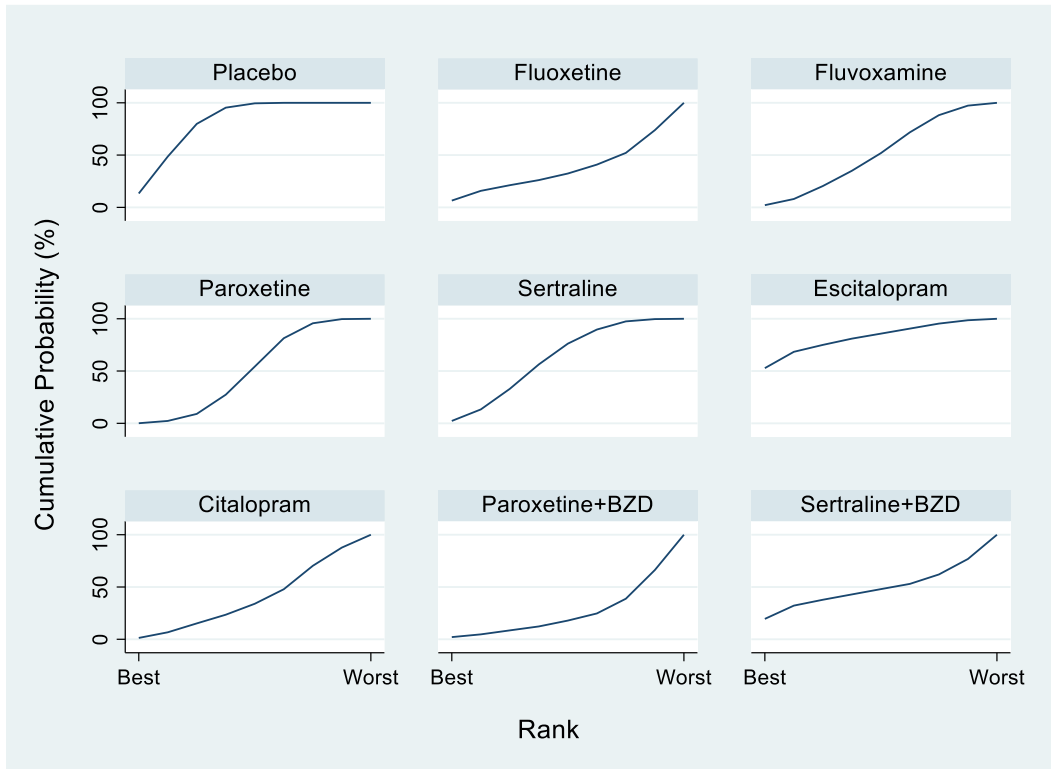

| Treatment      | SUCRA | PrBest | MeanRank |
|----------------|-------|--------|----------|
| Placebo        | 79.6  | 13.3   | 2.6      |
| Fluoxetine     | 33.6  | 6.5    | 6.3      |
| Fluvoxamine    | 46.8  | 2.1    | 5.3      |
| Paroxetine     | 46.2  | 0.1    | 5.3      |
| Sertraline     | 58.5  | 2.3    | 4.3      |
| Escitalopram   | 80.9  | 52.8   | 2.5      |
| Citalopram     | 35.8  | 1.3    | 6.1      |
| paroxetine+BZD | 21.9  | 2.1    | 7.2      |
| sertraline+BZD | 46.5  | 19.5   | 5.3      |

**eAppendix Figure 21.** Comparison-adjusted funnel plot of adverse events for individual selective serotonin reuptake inhibitors

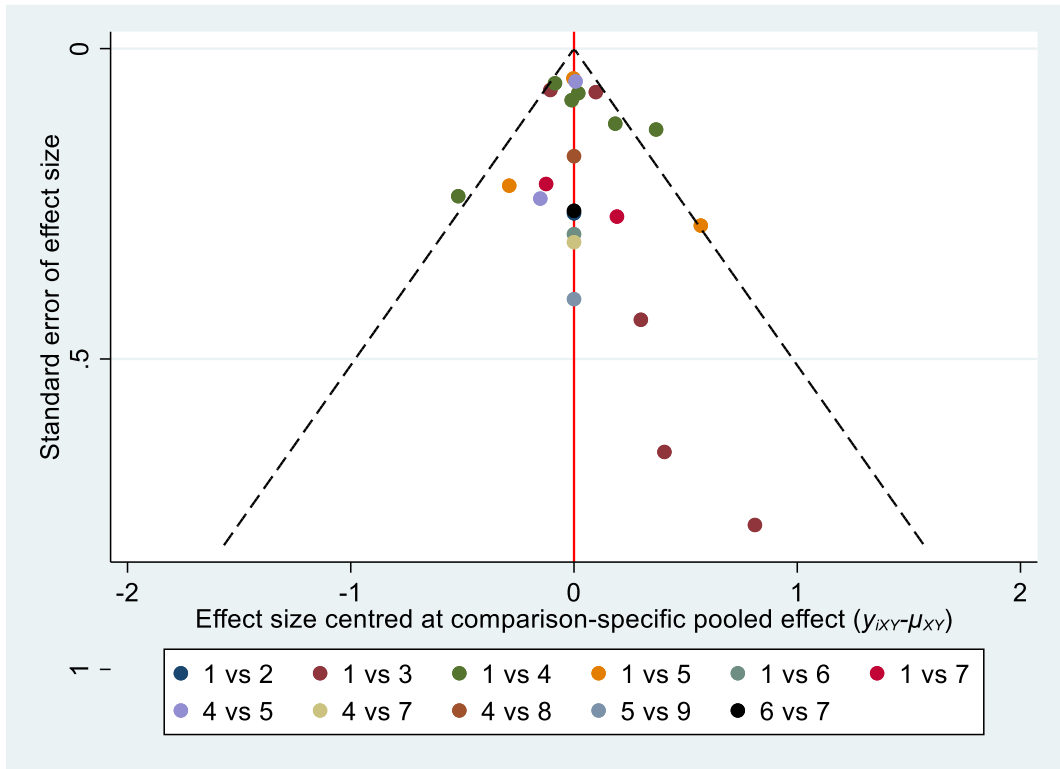

#### eAppendix 4. References of included studies

1. Drug treatment of panic disorder. Comparative efficacy of alprazolam, imipramine, and placebo. Cross-National Collaborative Panic Study, Second Phase Investigators. *The British journal of psychiatry: the journal of mental science*. 1992;160:191-202; discussion -5.
2. Andersch SR, N. K.:Kullingsjo, H.:Ottosson, J. O.:Bech, P.:Bruun-Hansen, J.:Hanson, L.:Lorentzen, K.:Mellergard, M.:Rasmussen, S.:et al.,. Efficacy and safety of alprazolam, imipramine and placebo in treating panic disorder. A Scandinavian multicenter study. *Acta psychiatrica Scandinavica Supplementum*. 1991;365:18-27.
3. Asnis GMH, F. A.:Goddard, A. W.:Potkin, S. G.:Black, D.:Jameel, M.:Desagani, K.:Woods, S. W. Fluvoxamine in the treatment of panic disorder: a multi-center, double-blind, placebo-controlled study in outpatients. *Psychiatry research*. 2001;103(1):1-14.
4. Bakish DH, C. L.:Filteau, M. J.:Charbonneau, Y.:Fraser, G.:West, D. L.:Thibaudeau, C.:Raine, D. A double-blind placebo-controlled trial comparing fluvoxamine and imipramine in the treatment of panic disorder with or without agoraphobia. *Psychopharmacology bulletin*. 1996;32(1):135-41.
5. Bakker AvD, R.:Spinhoven, P.:van Balkom, A. J. Paroxetine, clomipramine, and cognitive therapy in the treatment of panic disorder. *The Journal of clinical psychiatry*. 1999;60(12):831-8.
6. Ballenger JCB, G. D.:DuPont, R. L., Jr.:Lesser, I. M.:Noyes, R., Jr.:Pecknold, J. C.:Rifkin, A.:Swinson, R. P. Alprazolam in panic disorder and agoraphobia: results from a multicenter trial. I. Efficacy in short-term treatment. *Archives of general psychiatry*. 1988;45(5):413-22.
7. Ballenger JC, Wheadon DE, Steiner M, Bushnell W, Gergel IP. Double-blind, fixed-dose, placebo-controlled study of paroxetine in the treatment of panic disorder. *The American journal of psychiatry*. 1998;155(1):36-42.
8. Bandelow BB, K.:Lenoir, S.:Hendriks, G. J.:Alkin, T.:Goebel, C.:Clary, C. M. Sertraline versus paroxetine in the treatment of panic disorder: an acute, double-blind noninferiority comparison. *The Journal of clinical psychiatry*. 2004;65(3):405-13.
9. Beauclair LF, R.:Annable, L.:Holobow, N.:Chouinard, G. Clonazepam in the treatment of panic disorder: a double-blind, placebo-controlled trial investigating the correlation between clonazepam concentrations in plasma and clinical response. *Journal of clinical psychopharmacology*. 1994;14(2):111-8.
10. Bertani AP, G.:Migliarese, G.:Di Pasquale, D.:Cucchi, M.:Caldirola, D.:Bellodi, L. Comparison of the treatment with paroxetine and reboxetine in panic disorder: a randomized, single-blind study. *Pharmacopsychiatry*. 2004;37(5):206-10.
11. Black DWW, R.:Bowers, W.:Gabel, J. A comparison of fluvoxamine, cognitive therapy, and placebo in the treatment of panic disorder. *Archives of general psychiatry*. 1993;50(1):44-50.
12. Bradwejn JA, A.:Stein, D. J.:Salinas, E.:Emilien, G.:Whitaker, T. Venlafaxine extended-release capsules in panic disorder: flexible-dose, double-blind, placebo-controlled study. *The British journal of psychiatry : the journal of mental science*. 2005;187:352-9.
13. Bystritsky AR, R. M.:Murphy, K. J.:Bohn, P.:Keys, S. A.:Vapnik, T. Double-blind pilot trial of desipramine versus fluoxetine in panic patients. *Anxiety*. 1994;1(6):287-90.

14. Carter CSF, J.:Hertzman, M.:Papp, L. A.:Jones, W.:Patterson, W. M.:Swinson, R. P.:Weise, C. C.:Maddock, R. J.:Denahan, A. Q.:et al., Adinazolam-SR in panic disorder with agoraphobia: relationship of daily dose to efficacy. *The Journal of clinical psychiatry*. 1995;56(5):202-10.
15. Ciraulo DAA, E. J.:Smith, R. B.:Olson, D. R.:Goldberg, D. A.:Rand, E. H.:Raskin, R. B.:Phillips, J. P.:Shader, R. I.:Greenblatt, D. J. The relationship of alprazolam dose to steady-state plasma concentrations. *Journal of clinical psychopharmacology*. 1990;10(1):27-32.
16. Goddard AWB, T.:Almai, A.:Jetty, P.:Woods, S. W.:Charney, D. Early coadministration of clonazepam with sertraline for panic disorder. *Archives of general psychiatry*. 2001;58(7):681-6.
17. Hirschmann SD, P. N.:Iancu, I.:Dolberg, O. T.:Zohar, J.:Grunhaus, L. Pindolol augmentation in patients with treatment-resistant panic disorder: A double-blind, placebo-controlled trial. *Journal of clinical psychopharmacology*. 2000;20(5):556-9.
18. Hoehn-Saric RM, D. R.:Hipsley, P. A. Effect of fluvoxamine on panic disorder. *Journal of clinical psychopharmacology*. 1993;13(5):321-6.
19. Keller MB, Lavori PW, Goldenberg IM, Baker LA, Pollack MH, Sachs GS, et al. Influence of depression on the treatment of panic disorder with imipramine, alprazolam and placebo. *Journal of affective disorders*. 1993;28(1):27-38.
20. Klosko JSB, D. H.:Tassinari, R.:Cerny, J. A. A comparison of alprazolam and behavior therapy in treatment of panic disorder. *Journal of consulting and clinical psychology*. 1990;58(1):77-84.
21. Liebowitz MRA, G.:Mangano, R.:Tzanis, E. A double-blind, placebo-controlled, parallel-group, flexible-dose study of venlafaxine extended release capsules in adult outpatients with panic disorder. *The Journal of clinical psychiatry*. 2009;70(4):550-61.
22. Loerch BG-M, M.:Hautzinger, M.:Schlegel, S.:Hain, C.:Sandmann, J.:Benkert, O. Randomised placebo-controlled trial of moclobemide, cognitive-behavioural therapy and their combination in panic disorder with agoraphobia. *The British journal of psychiatry : the journal of mental science*. 1999;174:205-12.
23. Londeborg PDW, R.:Smith, W. T.:DuBoff, E.:England, D.:Ferguson, J.:Rosenthal, M.:Weise, C. Sertraline in the treatment of panic disorder. A multi-site, double-blind, placebo-controlled, fixed-dose investigation. *The British journal of psychiatry : the journal of mental science*. 1998;173:54-60.
24. Lydiard RBL, I. M.:Ballenger, J. C.:Rubin, R. T.:Laraia, M.:DuPont, R. A fixed-dose study of alprazolam 2 mg, alprazolam 6 mg, and placebo in panic disorder. *Journal of clinical psychopharmacology*. 1992;12(2):96-103.
25. Lydiard RBM, W. A.:Emmanuel, N. P.:Zealberg, J. J.:Laraia, M. T.:Stuart, G. W.:O'Neil, P. M.:Ballenger, J. C. Preliminary report: placebo-controlled, double-blind study of the clinical and metabolic effects of desipramine in panic disorder. *Psychopharmacology bulletin*. 1993;29(2):183-8.
26. Marchesi CDP, C.:Cantoni, A.:Fonto, S.:Giannelli, M. R.:Maggini, C. Personality disorders and response to medication treatment in panic disorder: a 1-year naturalistic study. *Progress in neuro-psychopharmacology & biological psychiatry*. 2006;30(7):1240-5.
27. Michelson DA, C.:Dantendorfer, K.:Knezevic, A.:Maierhofer, D.:Micev, V.:Paunovic, V. R.:Timotijevic, I.:Sarkar, N.:Skoglund, L.:Pemberton, S. C. Efficacy of usual antidepressant dosing regimens of fluoxetine in panic disorder: randomised, placebo-controlled trial. *The British journal of psychiatry : the journal of mental science*. 2001;179:514-8.

28. Michelson DL, R. B.:Pollack, M. H.:Tamura, R. N.:Hoog, S. L.:Tepner, R.:Demitrack, M. A.:Tollefson, G. D. Outcome assessment and clinical improvement in panic disorder: evidence from a randomized controlled trial of fluoxetine and placebo. The Fluoxetine Panic Disorder Study Group. *The American journal of psychiatry*. 1998;155(11):1570-7.
29. Moroz GR, J. F. Efficacy, safety, and gradual discontinuation of clonazepam in panic disorder: a placebo-controlled, multicenter study using optimized dosages. *The Journal of clinical psychiatry*. 1999;60(9):604-12.
30. Munjack DJC, B.:Cabe, D.:Brown, R.:Usigli, R.:Zulueta, A.:McManus, M.:McDowell, D.:Palmer, R.:Leonard, M. Alprazolam, propranolol, and placebo in the treatment of panic disorder and agoraphobia with panic attacks. *Journal of clinical psychopharmacology*. 1989;9(1):22-7.
31. Nair NPB, D.:Saxena, B.:Amin, M.:Schwartz, G.:West, T. E. Comparison of fluvoxamine, imipramine, and placebo in the treatment of outpatients with panic disorder. *Anxiety*. 1996;2(4):192-8.
32. Oehrberg SC, P. E.:Behnke, K.:Borup, A. L.:Severin, B.:Soegaard, J.:Calberg, H.:Judge, R.:Ohrstrom, J. K.:Manniche, P. M. Paroxetine in the treatment of panic disorder. A randomised, double-blind, placebo-controlled study. *The British journal of psychiatry : the journal of mental science*. 1995;167(3):374-9.
33. Pecknold JL, L.:Munjack, D.:Alexander, P. A double-blind, placebo-controlled, multicenter study with alprazolam and extended-release alprazolam in the treatment of panic disorder. *Journal of clinical psychopharmacology*. 1994;14(5):314-21.
34. Perna GB, A.:Caldirola, D.:Smeraldi, E.:Bellodi, L. A comparison of citalopram and paroxetine in the treatment of panic disorder: a randomized, single-blind study. *Pharmacopsychiatry*. 2001;34(3):85-90.
35. Pohl RB, R.:Yeragani, V. K.:Gershon, S. Serotonergic anxiolytics in the treatment of panic disorder: a controlled study with buspirone. *Psychopathology*. 1989;22 Suppl 1:60-7.
36. Pohl RBW, R. M.:Clary, C. M. Sertraline in the treatment of panic disorder: a double-blind multicenter trial. *The American journal of psychiatry*. 1998;155(9):1189-95.
37. Pollack MHL, U.:Koponen, H.:Simon, N. M.:Worthington, J. J.:Emilien, G.:Tzanis, E.:Salinas, E.:Whitaker, T.:Gao, B. A double-blind study of the efficacy of venlafaxine extended-release, paroxetine, and placebo in the treatment of panic disorder. *Depression and anxiety*. 2007;24(1):1-14.
38. Pollack MHO, M. W.:Worthington, J. J.:Manfro, G. G.:Wolkow, R. Sertraline in the treatment of panic disorder: a flexible-dose multicenter trial. *Archives of general psychiatry*. 1998;55(11):1010-6.
39. Pollack MHS, N. M.:Worthington, J. J.:Doyle, A. L.:Peters, P.:Toshkov, F.:Otto, M. W. Combined paroxetine and clonazepam treatment strategies compared to paroxetine monotherapy for panic disorder. *Journal of psychopharmacology (Oxford, England)*. 2003;17(3):276-82.
40. Pollack MHW, J. J., 3rd:Otto, M. W.:Maki, K. M.:Smoller, J. W.:Manfro, G. G.:Rudolph, R.:Rosenbaum, J. F. Venlafaxine for panic disorder: results from a double-blind, placebo-controlled study. *Psychopharmacology bulletin*. 1996;32(4):667-70.
41. Ravaris CLF, M. J.:Hauri, P. J.:McHugo, G. J. A controlled study of alprazolam and propranolol in panic-disordered and agoraphobic outpatients. *Journal of clinical psychopharmacology*. 1991;11(6):344-50.
42. Robinson DSS, R. C.:Alms, D. R.:Messina, M.:Andary, J. Treatment of panic disorder: nonbenzodiazepine anxiolytics, including buspirone. *Psychopharmacology bulletin*. 1989;25(1):21-6.

43. Savoldi FS, G.:Ecari, U. Etizolam versus placebo in the treatment of panic disorder with agoraphobia: a double-blind study. *Current medical research and opinion*. 1990;12(3):185-90.
44. Schweizer EP, W.:Rickels, K.:Rosenthal, M. Double-blind, placebo-controlled study of a once-a-day, sustained-release preparation of alprazolam for the treatment of panic disorder. *The American journal of psychiatry*. 1993;150(8):1210-5.
45. Schweizer ER, K. Buspirone in the treatment of panic disorder: a controlled pilot comparison with clorazepate. *Journal of clinical psychopharmacology*. 1988;8(4):303.
46. Schweizer ER, K.:Weiss, S.:Zavodnick, S. Maintenance drug treatment of panic disorder. I. Results of a prospective, placebo-controlled comparison of alprazolam and imipramine. *Archives of general psychiatry*. 1993;50(1):51-60.
47. Seedat SvRvO, E.:Muller, J. E.:Mohr, N.:Stein, D. J. Reboxetine and citalopram in panic disorder: a single-blind, cross-over, flexible-dose pilot study. *International clinical psychopharmacology*. 2003;18(5):279-84.
48. Sheehan DVB, D. B.:Iyengar, M. K.:Perera, P. Efficacy and tolerability of controlled-release paroxetine in the treatment of panic disorder. *The Journal of clinical psychiatry*. 2005;66(1):34-40.
49. Sheehan DVR, A. B.:Harnett-Sheehan, K.:Soto, S.:Knapp, E. The relative efficacy of high-dose buspirone and alprazolam in the treatment of panic disorder: a double-blind placebo-controlled study. *Acta psychiatrica Scandinavica*. 1993;88(1):1-11.
50. Sheehan DVR, A. B.:Sheehan, K. H.:Soto, S. Is buspirone effective for panic disorder? *Journal of clinical psychopharmacology*. 1990;10(1):3-11.
51. Sheikh JIS, P. J. Treatment of panic disorder in older adults: a pilot study comparison of alprazolam, imipramine, and placebo. *International journal of psychiatry in medicine*. 1999;29(1):107-17.
52. Stahl SMG, I.:Li, D. Escitalopram in the treatment of panic disorder: a randomized, double-blind, placebo-controlled trial. *The Journal of clinical psychiatry*. 2003;64(11):1322-7.
53. Taylor CBH, C.:King, R.:Ehlers, A.:Margraf, J.:Maddock, R.:Clark, D.:Roth, W. T.:Agras, W. S. Cardiovascular and symptomatic reduction effects of alprazolam and imipramine in patients with panic disorder: results of a double-blind, placebo-controlled trial. *Journal of clinical psychopharmacology*. 1990;10(2):112-8.
54. Tesar GER, J. F.:Pollack, M. H.:Otto, M. W.:Sachs, G. S.:Herman, J. B.:Cohen, L. S.:Spier, S. A. Double-blind, placebo-controlled comparison of clonazepam and alprazolam for panic disorder. *The Journal of clinical psychiatry*. 1991;52(2):69-76.
55. Tiller JWB, C.:Behnke, K. Moclobemide and fluoxetine for panic disorder. *International Panic Disorder Study Group*. *European archives of psychiatry and clinical neuroscience*. 1999;249 Suppl 1:S7-10.
56. Uhlenhuth EHM, W.:Glass, R. M.:Easton, C. Response of panic disorder to fixed doses of alprazolam or imipramine. *Journal of affective disorders*. 1989;17(3):261-70.
57. van Vliet IMW, H. G.:Den Boer, J. A. MAO inhibitors in panic disorder: clinical effects of treatment with brofaromine. A double blind placebo controlled study. *Psychopharmacology*. 1993;112(4):483-9.
58. Versiani MC, G.:Perugi, G.:Benedetti, A.:Mastalli, L.:Nardi, A.:Savino, M. Reboxetine, a selective norepinephrine reuptake inhibitor, is an effective and well-tolerated treatment for panic disorder. *The Journal of clinical psychiatry*. 2002;63(1):31-7.



59. Wade AGL, U.:Koponen, H. J.:Pedersen, V.:Pedersen, T. The effect of citalopram in panic disorder. *The British journal of psychiatry : the journal of mental science*. 1997;170:549-53.
60. Westenberg HGdB, J. A. Serotonin-influencing drugs in the treatment of panic disorder. *Psychopathology*. 1989;22 Suppl 1:68-77.
61. Woods SWN, L. M.:Koleszar, A. S.:Krystal, J. H.:Heninger, G. R.:Charney, D. S. Controlled trial of alprazolam supplementation during imipramine treatment of panic disorder. *Journal of clinical psychopharmacology*. 1992;12(1):32-8.
62. Amore MM, K.:Cerisoli, M.:Casagrande, C.:Ferrari, G. Panic disorder. A long-term treatment study: Fluoxetine vs imipramine. *Human Psychopharmacology*. 1999;14(6):429-34.
63. Amore MM, K.:Cerisoli, M.:Ferrari, G. Short-term and long-term evaluation of selective serotonin reuptake inhibitors in the treatment of panic disorder: Fluoxetine vs citalopram. *Human Psychopharmacology*. 1999;14(6):435-40.
64. Barlow DHG, J. M.:Shear, M. K.:Woods, S. W. Cognitive-behavioral therapy, imipramine, or their combination for panic disorder: A randomized controlled trial. *Journal of the American Medical Association*. 2000;283(19):2529-36.
65. Bergink VW, H. G. M. Metabotropic glutamate II receptor agonists in panic disorder: A double blind clinical trial with LY354740. *International Clinical Psychopharmacology*. 2005;20(6):291-3.
66. Broocks AB, B.:Pekrun, G.:George, A.:Meyer, T.:Bartmann, U.:Hillmer-Vogel, U.:Rüther, E. Comparison of aerobic exercise, clomipramine, and placebo in the treatment of panic disorder. *American Journal of Psychiatry*. 1998;155(5):603-9.
67. Caillard VR, F.:Viel, J. F.:Markabi, S.:Rouitlon, F. Comparative effects of low and high doses of clomipramine and placebo in panic disorder: A double-blind controlled study. *Acta Psychiatrica Scandinavica*. 1999;99(1):51-8.
68. Davidson JRTB, B.:Greist, J. H.:Maddock, R. J.:Lewis, C. P.:Sheridan, A. Q.:Carter, C.:Krishnan, K. R.:Liebowitz, M. R.:Haack, D. G. Adinazolam sustained-release treatment of panic disorder: A double-blind study. *Journal of Clinical Psychopharmacology*. 1994;14(4):255-63.
69. Fiseković SL-Z, S. Sertraline and alprazolam in the treatment of panic disorder. *Bosnian journal of basic medical sciences / Udruzenje basicnih medicinskih znanosti = Association of Basic Medical Sciences*. 2005;5(2):78-81.
70. Hendriks GJK, G. P. J.:Kampman, M.:Oude Voshaar, R. C.:Verbraak, M. J. P. M.:Broekman, T. G.:Hoogduin, C. A. L. A randomized controlled study of paroxetine and cognitive-behavioural therapy for late-life panic disorder. *Acta Psychiatrica Scandinavica*. 2010;122(1):11-9.
71. Holland RLM, B. C.:Hindmarch, I. Specific effects of benzodiazepines and tricyclic antidepressants in panic disorder: Comparisons of clomipramine with alprazolam SR and adinazolam SR. *Human Psychopharmacology*. 1999;14(2):119-24.
72. Krüger MBD, A. A. The efficacy and safety of moclobemide compared to clomipramine in the treatment of panic disorder. *European Archives of Psychiatry and Clinical Neuroscience*. 1999;249(SUPPL.):S19-S24.
73. Lecrubier YB, A.:Dunbar, G.:Judge, R. A comparison of paroxetine, clomipramine and placebo in the treatment of panic disorder. *Acta Psychiatrica Scandinavica*. 1997;95(2):145-52.

74. Lepola UA, M.:Zhu, Y.:Austin, C. Sertraline versus imipramine treatment of comorbid panic disorder and major depressive disorder. *Journal of Clinical Psychiatry*. 2003;64(6):654-62.
75. Mavissakalian MRP, J. M. Imipramine treatment of panic disorder with agoraphobia: Dose ranging and plasma level-response relationships. *American Journal of Psychiatry*. 1995;152(5):673-82.
76. Nardi AEV, A. M.:Freire, R. C.:Mochcovitch, M. D.:Amrein, R.:Sardinha, A.:Levitan, M. N.:Nascimento, I.:de-Melo-Neto, V. L.:King, A. L.:e Silva, A. C. O.:Veras, A. B.:Dias, G. P.:Soares-Filho, G. L.:da Costa, R. T.:Mezzasalma, M. A.:de Carvalho, M. R.:de Cerqueira, A. C.:Hallak, J. E.:Crippa, J. A.:Versiani, M. Psychopharmacotherapy of panic disorder: 8-week randomized trial with clonazepam and paroxetine. *Brazilian Journal of Medical and Biological Research*. 2011;44(4):366-73.
77. Noyes Jr RB, G. D.:Reich, J. H.:Judd, F. K.:Garvey, M. J.:Norman, T. R.:Cook, B. L.:Marriott, P. Diazepam versus alprazolam for the treatment of panic disorder. *Journal of Clinical Psychiatry*. 1996;57(8):349-55.
78. Pini SA, X. F.:Dell'Osso, L.:Rossi, N. B.:Cassano, P.:Savino, M.:Cassano, G. B. Treatment of depression with comorbid anxiety disorders: Differential efficacy of paroxetine versus moclobemide. *International Clinical Psychopharmacology*. 2003;18(1):15-21.
79. Pollack MM, R.:Entsuah, R.:Tzanis, E.:Simon, N. M. A randomized controlled trial of venlafaxine ER and paroxetine in the treatment of outpatients with panic disorder. *Psychopharmacology*. 2007;194(2):233-42.
80. Ribeiro LB, J. V.:Kauer-Sant'Anna, M.:Madruga, M.:Quevedo, J.:Busnello, E. A. D.:Kapczinski, F. Mirtazapine versus fluoxetine in the treatment of panic disorder. *Brazilian Journal of Medical and Biological Research*. 2001;34(10):1303-7.
81. Rosenbaum JFM, G.:Bowden, C. L. Clonazepam in the treatment of panic disorder with or without agoraphobia: A dose-response study of efficacy, safety, and discontinuance. *Journal of Clinical Psychopharmacology*. 1997;17(5):390-400.
82. Sandmann JL, B.:Bandelow, B.:Härtter, S.:Winter, P.:Hiemke, C.:Benkert, O. Fluvoxamine or placebo in the treatment of panic disorder and relationship to blood concentrations of fluvoxamine. *Pharmacopsychiatry*. 1998;31(4):117-21.
83. Sharp DMP, K. G.:Simpson, R. J.:Swanson, V.:Moodie, E.:Anstee, J. A.:Pharm, B.:Ashford, J. J. Fluvoxamine, placebo, and cognitive behaviour therapy used alone and in combination in the treatment of panic disorder and agoraphobia. *Journal of Anxiety Disorders*. 1996;10(4):219-42.
84. Valença AMN, A. E.:Mezzasalma, M. A.:Nascimento, I.:Araújo Zin, W.:Leão Lopes, F.:Versiani, M. Therapeutic response to benzodiazepine in panic disorder subtypes. *Sao Paulo Medical Journal*. 2003;121(2):77-80.
85. Valença AMN, A. E.:Nascimento, I.:Mezzasalma, M. A.:Lopes, F. L.:Zin, W. Double-blind clonazepam vs placebo in panic disorder treatment. *Arquivos de Neuro-Psiquiatria*. 2000;58(4):1025-9.
86. Van Vliet IMDB, J. A.:Westenberg, H. G. M.:Slaap, B. R. A double-blind comparative study of brofaromine and fluvoxamine in outpatients with panic disorder. *Journal of Clinical Psychopharmacology*. 1996;16(4):299-306.
87. Clinicaltrials.gov. A Study Of Sertraline Compared With Paroxetine In The Treatment Of Panic Disorder.
